# Supplementary material for: Acid-promoted denitrogenative Pd-catalyzed addition of arylhydrazines with nitriles at room temperature
Source: Royal Society of Chemistry journal article supplement (doi:10.1039/c6qo00634e), 2016-12-13

# Acid-promoted Denitrogenative Pd-Catalyzed Addition of Arylhydrazines with Nitriles at Room Temperature

Kai Cheng , Guofang Wang, Mengting Meng and Chenze Qi\*

Zhejiang Key Laboratory of Alternative Technologies for Fine Chemicals Process, Shaoxing University, Shaoxing, 312000, People's Republic of China;

Tel: +86-575-88345683; Fax: +86-575-88345683. E-mail address: qichenze@163.com

## Supporting Materials

### Content

|                                           |    |
|-------------------------------------------|----|
| General .....                             | 2  |
| Typical procedure for the product.....    | 2  |
| Characterization data of the product..... | 3  |
| Copies of NMR Spectrum.....               | 10 |

## General

Starting materials were purchased from common commercial sources and all solvents were purified and dried according to standard methods prior to use. Arylglyoxylic acids were prepared from corresponding aryl methyl ketone.  $^1\text{H}$  NMR spectra were recorded on a 400 M Hz spectrometer using tetramethylsilane (TMS) as internal standard. Proton chemical shifts are reported in parts per million (ppm) relative to TMS. Multiplicities are reported as: singlet (s), doublet (d), triplet (t) and multiplet (m).  $^{13}\text{C}$  NMR spectra were recorded at 100 MHz using TMS as internal standard. HRMS (EI) data were collected on High Resolution mass spectrometer (ion trap). Element analysis data were collected on elemental analyser (EuroVector, Italy, EA3000). Other substrates and catalysts were commercially available and used without additional purification.

## Typical procedure for the product

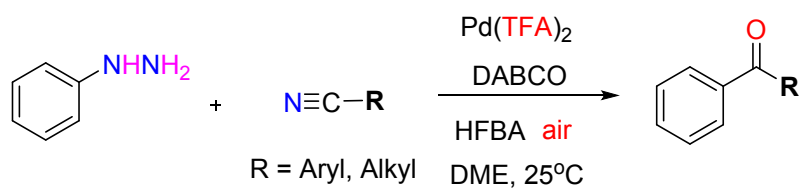

A mixture of arylhydrazines (0.5 mmol), nitriles (0.5 mmol),  $\text{Pd}(\text{TFA})_2$  (5 mol%), DABCO (10 mol%), HFBA (0.5 mmol), was stirred at  $25^\circ\text{C}$  for 12 h in DME (1 mL). Afterward, the mixture was filtered through a pad of celite. The solvent was evaporated under reduced pressure, and the residue was subjected to flash column chromatography to obtain the desired product.

## Characterization data of the product

### (1) benzophenone (3a, 4a)

Purification by column chromatography (silica gel, ethyl acetate / petroleum ether = 1/20, v/v) afforded as a white solid (82.8mg for 3a and 81.9mg for 4a). m.p. 47–49 °C (lit.<sup>1</sup> mp 47–48 °C); <sup>1</sup>H NMR ( 400 MHz, CDCl<sub>3</sub>, TMS ) δ 7.81 ( d, *J* = 8.4 Hz, 4 H ), 7.58 ( t, *J* = 7.6 Hz, 2 H ), 7.48 ( t, *J* = 7.6 Hz, 4 H ). <sup>13</sup>C NMR ( 100 MHz, CDCl<sub>3</sub> ) δ 196.95, 137.60, 132.45, 130.09, 128.30. HRMS *m/z* (ESI) calcd for C<sub>13</sub>H<sub>10</sub>O [M+H]<sup>+</sup> 183.0804, found 183.0800.

### (2) 4-(dimethylamino)benzophenone (3b)

Purification by column chromatography (silica gel, ethyl acetate / petroleum ether / acetic acid = 1/10, v/v) afforded as a white solid (100.1mg). m.p. 92-93 °C (lit.<sup>2</sup> mp 93 °C); <sup>1</sup>H NMR ( 400 MHz, CDCl<sub>3</sub>, TMS ) δ 7.80 ( d, *J* = 7.2 Hz, 2 H ), 7.72 ( t, *J* = 6.8 Hz, 2 H ), 7.52 ( t, *J* = 7.2 Hz, 1 H ), 7.44 ( t, *J* = 7.6 Hz, 2 H ), 6.67 ( d, *J* = 7.6 Hz, 2 H ), 3.06 ( s, 6 H ). <sup>13</sup>C NMR ( 100 MHz, CDCl<sub>3</sub> ) δ 195.17, 153.27, 139.30, 132.77, 131.15, 129.46, 128.04, 124.66, 110.53, 40.08. HRMS *m/z* (ESI) calcd for C<sub>15</sub>H<sub>16</sub>NO [M+H]<sup>+</sup> 226.1226, found 226.1223.

### (3) 4-fluorobenzophenone (3c)

Purification by column chromatography (silica gel, ethyl acetate / petroleum ether = 1/20, v/v) afforded as a white solid (90.0mg). m.p. 45–47 °C (lit.<sup>4</sup> mp 45–47 °C); <sup>1</sup>H NMR ( 400 MHz, CDCl<sub>3</sub>, TMS ) δ 7.85 ( dd, *J*<sub>1</sub> = 8.4 Hz, *J*<sub>2</sub> = 5.2 Hz, 2 H ), 7.78 ( d, *J* = 7.2 Hz, 2 H ), 7.58 ( t, *J* = 7.2 Hz, 1 H ), 7.49 ( t, *J* = 7.6 Hz, 2 H ), 7.17 ( t, *J* = 8.0 Hz, 2 H ). <sup>13</sup>C NMR ( 100 MHz, CDCl<sub>3</sub> ) δ 195.31, 166.64 (d, *J* = 252 Hz), 137.48, 133.77, 132.74 (d, *J* = 9.0 Hz), 132.52, 129.90, 128.39, 115.57 (d, *J* = 21 Hz). HRMS *m/z* (ESI) calcd for C<sub>13</sub>H<sub>10</sub>FO [M+H]<sup>+</sup> 201.0710, found 201.0703.

### (4) 4-nitrobenzophenone (3d)

Purification by column chromatography (silica gel, ethyl acetate / petroleum ether = 1/3, v/v) afforded as a yellow solid (97.6mg). m.p. 141–142 °C (lit.<sup>3</sup> mp 140–142 °C); <sup>1</sup>H NMR ( 400 MHz, CDCl<sub>3</sub>, TMS ) δ 8.35 ( d, *J* = 7.6 Hz, 2 H ), 7.94 ( d, *J* = 7.6 Hz, 2

H ), 7.82 ( d,  $J = 7.6$  Hz, 2 H ), 7.67 ( t,  $J = 7.6$  Hz, 1 H ), 7.52 ( t,  $J = 7.6$  Hz, 2 H ).  $^{13}\text{C}$  NMR ( 100 MHz,  $\text{CDCl}_3$  )  $\delta$  194.79, 149.80, 142.88, 136.27, 133.48, 130.71, 130.11, 128.68, 123.54. HRMS (EI) Calcd for  $\text{C}_{13}\text{H}_9\text{NO}_3$  ( $\text{M}^+$ ) 227.0582, Found 227.0580. HRMS  $m/z$  (ESI) calcd for  $\text{C}_{13}\text{H}_{10}\text{NO}_3$  [ $\text{M}+\text{H}$ ] $^+$  227.0582, found 227.0583.

#### **(5) 4-benzoylbenzoic acid (3e)**

Purification by column chromatography (silica gel, ethyl acetate / petroleum ether / acetic acid = 4/1/0.025, v/v/v) afforded as a white solid (83.8mg). m.p. 198–199 °C (lit.<sup>7</sup> mp 198–200 °C);  $^1\text{H}$  NMR ( 400 MHz,  $\text{CDCl}_3$ , TMS )  $\delta$  10.53 ( br, 1 H ), 8.24 ( d,  $J = 8.4$  Hz, 2 H ), 7.88 ( d  $J = 8.4$  Hz, 2 H ), 7.83 ( d,  $J = 7.6$  Hz, 2 H ), 7.65 ( t,  $J = 7.6$  Hz, 1 H ), 7.51 ( t,  $J = 7.6$  Hz, 2 H ).  $^{13}\text{C}$  NMR ( 100 MHz,  $\text{CDCl}_3$  )  $\delta$  196.01, 170.73, 142.15, 136.74, 133.12, 132.21, 130.16, 129.86, 128.52. HRMS  $m/z$  (ESI) calcd for  $\text{C}_{14}\text{H}_{11}\text{O}_3$  [ $\text{M}+\text{H}$ ] $^+$  227.0703, found 227.0694.

#### **(6) 3,4-dimethylbenzophenone (3f)**

Purification by column chromatography (silica gel, ethyl acetate / petroleum ether = 1/20, v/v) afforded as a white solid (92.4mg). m.p. 48–50 °C (lit.<sup>8</sup> mp 47–49 °C);  $^1\text{H}$  NMR ( 400 MHz,  $\text{CDCl}_3$ , TMS )  $\delta$  7.82 ( d,  $J = 8.0$  Hz, 2 H ), 7.64 ( s, 1 H ), 7.53–7.61 ( m, 2 H ), 7.49 ( t,  $J = 7.2$  Hz, 2 H ), 7.24 ( t,  $J = 8.0$  Hz, 1 H ), 2.36 ( s, 3 H ), 2.33 ( s, 3 H ).  $^{13}\text{C}$  NMR ( 100 MHz,  $\text{CDCl}_3$  )  $\delta$  196.72, 141.99, 138.08, 136.75, 135.30, 132.11, 131.20, 129.94, 129.45, 128.19, 128.06, 20.05, 19.79. HRMS  $m/z$  (ESI) calcd for  $\text{C}_{15}\text{H}_{15}\text{O}$  [ $\text{M}+\text{H}$ ] $^+$  211.1117, found 211.1112.

#### **(7) 3,4-dichlorobenzophenone (3g)**

Purification by column chromatography (silica gel, ethyl acetate / petroleum ether = 1/20, v/v) afforded as a white solid (100.4mg). m.p. 103–104 °C (lit.<sup>9</sup> mp 102–103 °C);  $^1\text{H}$  NMR ( 400 MHz,  $\text{CDCl}_3$ , TMS )  $\delta$  7.91 ( s, 1 H ), 7.78 ( d,  $J = 7.2$  Hz, 2 H ), 7.65 ( t,  $J = 8.0$  Hz, 2 H ), 7.58 ( d,  $J = 8.0$  Hz, 1 H ), 7.51 ( t,  $J = 7.6$  Hz, 2 H ).  $^{13}\text{C}$  NMR ( 100 MHz,  $\text{CDCl}_3$  )  $\delta$  194.22, 137.20, 137.01, 136.67, 133.01, 131.85, 130.46, 129.93, 129.08, 128.56. HRMS  $m/z$  (ESI) calcd for  $\text{C}_{13}\text{H}_9\text{Cl}_2\text{O}$  [ $\text{M}+\text{H}$ ] $^+$  251.0025, found 251.0015.

#### **(8) 4-methylbenzophenone (3h, 4c)**

Purification by column chromatography (silica gel, ethyl acetate / petroleum ether =

1/20, v/v) afforded as a white solid (90.2mg for 3h and 88.2mg for 4c). m.p. 56–57 °C (lit.<sup>3</sup> mp 56–58 °C); <sup>1</sup>H NMR ( 400 MHz, CDCl<sub>3</sub>, TMS ) δ 7.80 ( d, *J* = 7.2 Hz, 2 H ), 7.73 ( d, *J* = 8.0 Hz, 2 H ), 7.59 ( t, *J* = 7.2 Hz, 1 H ), 7.47 ( t, *J* = 7.6 Hz, 2 H ), 7.29 ( d, *J* = 8.0 Hz, 2 H ), 2.44 ( s, 3 H ). <sup>13</sup>C NMR ( 100 MHz, CDCl<sub>3</sub> ) δ 196.51, 143.26, 137.97, 134.89, 132.17, 130.34, 129.94, 128.99, 128.21, 21.67. HRMS *m/z* (ESI) calcd for C<sub>14</sub>H<sub>13</sub>O [M+H]<sup>+</sup> 197.0961, found 197.0962.

### **(9) 3-methyl-benzophenone (3i)**

Purification by column chromatography (silica gel, ethyl acetate / petroleum ether = 1/15, v/v) afforded as colorless oil (92.1mg). <sup>1</sup>H NMR ( 400 MHz, CDCl<sub>3</sub>, TMS ) δ 7.80 ( d, *J* = 6.8 Hz, 2 H ), 7.63 ( s, 1 H ), 7.58 ( d, *J* = 7.2 Hz, 2 H ), 7.48 ( t, *J* = 7.6 Hz, 2 H ), 7.34-7.42 ( m, 2 H ), 2.42 ( s, 3 H ). <sup>13</sup>C NMR ( 100 MHz, CDCl<sub>3</sub> ) δ 197.05, 138.18, 137.73, 137.60, 133.25, 132.39, 130.49, 130.08, 128.27, 128.11, 127.41, 21.40. HRMS *m/z* (ESI) calcd for C<sub>14</sub>H<sub>13</sub>O [M+H]<sup>+</sup> 197.0961, found 197.0957.

### **(10) 2-methylbenzophenone (3j)**

Purification by column chromatography (silica gel, ethyl acetate / petroleum ether = 1/20, v/v) afforded as colorless oil (82.3mg). <sup>1</sup>H NMR ( 400 MHz, CDCl<sub>3</sub>, TMS ) δ 7.83 ( d, *J* = 8.4 Hz, 2 H ), 7.60 ( t, *J* = 7.6 Hz, 1 H ), 7.48 ( t, *J* = 7.6 Hz, 2 H ), 7.41 ( t, *J* = 7.6 Hz, 1 H ), 7.23-7.34 ( m, 3 H ), 2.36 ( s, 3H ). <sup>13</sup>C NMR ( 100 MHz, CDCl<sub>3</sub> ) δ 198.66, 138.63, 137.74, 136.77, 133.14, 131.00, 130.25, 130.14, 128.53, 128.47, 125.18, 20.01. HRMS *m/z* (ESI) calcd for C<sub>14</sub>H<sub>13</sub>O [M+H]<sup>+</sup> 197.0961, found 197.0956.

### **(11) 2-benzoylthiophene (3k)**

Purification by column chromatography (silica gel, ethyl acetate / petroleum ether = 1/20, v/v) afforded as a white solid (78.0mg). m.p. 53–55 °C (lit.<sup>6</sup> mp 54–55 °C); <sup>1</sup>H NMR ( 400 MHz, CDCl<sub>3</sub>, TMS ) δ 7.85 ( t, *J* = 7.2 Hz, 2 H ), 7.72 ( d, *J* = 5.6 Hz, 1 H ), 7.64 ( d, *J* = 4.8 Hz, 1 H ), 7.59 ( t, *J* = 7.2 Hz, 1 H ), 7.48 ( t, *J* = 7.2 Hz, 2 H ), 7.16 ( t, *J* = 4.8 Hz, 1 H ). <sup>13</sup>C NMR ( 100 MHz, CDCl<sub>3</sub> ) δ 188.25, 143.64, 138.16, 134.88, 134.23, 132.28, 129.18, 128.43, 127.98. HRMS *m/z* (ESI) calcd for C<sub>11</sub>H<sub>9</sub>OS [M+H]<sup>+</sup> 189.0369, found 189.0363.

### **(12) 2-benzoylpyridine (3l)**

Purification by column chromatography (silica gel, ethyl acetate / petroleum ether = 1/15, v/v) afforded as a yellow solid (74.1mg). m.p. 42–43 °C (lit.<sup>12</sup> mp 42 °C); <sup>1</sup>H NMR ( 400 MHz, CDCl<sub>3</sub>, TMS ) δ 8.73 ( d, *J* = 4.8 Hz, 1 H ), 8.02-8.08 ( m, 3 H ), 7.89 ( t, *J* = 7.6 Hz, 1 H ), 7.58 ( d, *J* = 7.6 Hz, 1 H ), 7.49 ( t, *J* = 7.6 Hz, 3 H ). <sup>13</sup>C NMR ( 100 MHz, CDCl<sub>3</sub> ) δ 194.06, 155.07, 148.56, 137.08, 136.24, 132.94, 130.99, 128.19, 126.20, 124.63. HRMS *m/z* (ESI) calcd for C<sub>12</sub>H<sub>10</sub>NO [M+H]<sup>+</sup> 184.0757, found 184.0749.

#### **(13) 4-methoxy-benzophenone (4b)**

Purification by column chromatography (silica gel, ethyl acetate / petroleum ether = 1/15, v/v) afforded as a white solid (98.6mg). m.p. 57–58 °C (lit.<sup>1</sup> mp 58–59 °C); <sup>1</sup>H NMR ( 400 MHz, CDCl<sub>3</sub>, TMS ) δ 7.83 ( d, *J* = 8.4 Hz, 2 H ), 7.75 ( t, *J* = 7.6 Hz, 2 H ), 7.56 ( t, *J* = 7.6 Hz, 1 H ), 7.47 ( t, *J* = 7.6 Hz, 2 H ), 6.96 ( d, *J* = 8.8 Hz, 2 H ), 3.88 ( s, 3 H ). <sup>13</sup>C NMR ( 100 MHz, CDCl<sub>3</sub> ) δ 195.60, 163.22, 138.25, 132.59, 131.94, 130.10, 129.75, 128.21, 113.56, 55.52. HRMS *m/z* (ESI) calcd for C<sub>14</sub>H<sub>13</sub>O<sub>2</sub> [M+H]<sup>+</sup> 213.0910, found 213.0909.

#### **(14) 4-bromo-benzophenone (4d)**

Purification by column chromatography (silica gel, ethyl acetate / petroleum ether = 1/15, v/v) afforded as a white solid (109.6mg). m.p. 78–80 °C (lit.<sup>9</sup> mp 79–80 °C); <sup>1</sup>H NMR ( 400 MHz, CDCl<sub>3</sub>, TMS ) δ 7.77 ( d, *J* = 8.4 Hz, 2 H ), 7.58-7.69 ( m, 5 H ), 7.49 ( t, *J* = 7.6 Hz, 2 H ). <sup>13</sup>C NMR ( 100 MHz, CDCl<sub>3</sub> ) δ 195.68, 137.13, 136.27, 132.72, 131.63, 131.60, 129.97, 128.44, 127.54. HRMS *m/z* (ESI) calcd for C<sub>13</sub>H<sub>10</sub><sup>79</sup>BrO [M+H]<sup>+</sup> 260.9910, found 260.9907.

#### **(15) 4-trifluoromethyl-benzophenone (4e)**

Purification by column chromatography (silica gel, ethyl acetate / petroleum ether = 1/3, v/v) afforded as a yellow solid (107.5mg). m.p. 115–117 °C (lit.<sup>3</sup> mp 116–117 °C); <sup>1</sup>H NMR ( 400 MHz, CDCl<sub>3</sub>, TMS ) δ 7.90 ( d, *J* = 8.0 Hz, 2 H ), 7.81 ( d, *J* = 7.2 Hz, 2 H ), 7.76 ( d, *J* = 8.4 Hz, 2 H ), 7.63 ( t, *J* = 7.2 Hz, 1 H ), 7.51 ( t, *J* = 7.6 Hz, 2 H ). <sup>13</sup>C NMR ( 100 MHz, CDCl<sub>3</sub> ) δ 195.56, 140.71, 136.71, 133.70 ( dd, *J*<sub>1</sub> = 64.7 Hz, *J*<sub>2</sub> = 32.5 Hz ), 133.12, 130.15 ( d, *J* = 3.8 Hz ), 128.55, 125.36 ( dd, *J*<sub>1</sub> = 7.2 Hz, *J*<sub>2</sub> = 3.6 Hz ), 123.70 ( d, *J* = 271.3 Hz ). HRMS *m/z* (ESI) calcd for C<sub>14</sub>H<sub>10</sub>F<sub>3</sub>O [M+H]<sup>+</sup>

251.0678, found 251.0674.

**(16) 4-hydroxy-benzophenone (4f)**

Purification by column chromatography (silica gel, ethyl acetate / petroleum ether / acetic acid = 1/15/0.08, v/v/v) afforded as a white solid (76.2mg). m.p. 133–135 °C (lit.<sup>5</sup> mp 133–134 °C); <sup>1</sup>H NMR ( 400 MHz, CDCl<sub>3</sub>, TMS ) δ 7.81 ( br, 1 H ), 7.77 ( d, *J* = 8.4 Hz, 4 H ), 7.58 ( t, *J* = 7.2 Hz, 1 H ), 7.47 ( t, *J* = 7.6 Hz, 2 H ), 6.93 ( t, *J* = 8.8 Hz, 2 H ). <sup>13</sup>C NMR ( 100 MHz, CDCl<sub>3</sub> ) δ 197.19, 161.05, 137.97, 133.24, 132.33, 129.94, 129.37, 128.32, 115.48. HRMS *m/z* (ESI) calcd for C<sub>13</sub>H<sub>11</sub>O<sub>2</sub> [M+H]<sup>+</sup> 199.0754, found 199.0749.

**(17) 4-aminobenzophenone (4g)**

Purification by column chromatography (silica gel, ethyl acetate / petroleum ether / acetic acid = 1/10/0.05, v/v/v) afforded as a yellow solid (71.9mg). m.p. 121–122 °C (lit.<sup>6</sup> mp 120–121 °C); <sup>1</sup>H NMR ( 400 MHz, CDCl<sub>3</sub>, TMS ) δ 7.69-7.72 ( m, 4 H ), 7.53 ( t, *J* = 7.2 Hz, 1 H ), 7.44 ( t, *J* = 7.2 Hz, 2 H ), 6.67 ( d, *J* = 8.4 Hz, 2 H ), 4.28 ( br, 2 H ). <sup>13</sup>C NMR ( 100 MHz, CDCl<sub>3</sub> ) δ 195.47, 150.98, 138.86, 132.98, 131.49, 129.54, 128.13, 127.30, 112.78. HRMS *m/z* (ESI) calcd for C<sub>13</sub>H<sub>12</sub>NO [M+H]<sup>+</sup> 198.0913, found 198.0910.

**(18) 4-chloro-benzophenone (4h)**

Purification by column chromatography (silica gel, ethyl acetate / petroleum ether = 1/15, v/v) afforded as colorless oil (92.1mg). <sup>1</sup>H NMR ( 400 MHz, CDCl<sub>3</sub>, TMS ) δ 7.67 ( d, *J* = 6.4 Hz, 4 H ), 7.60 ( t, *J* = 7.2 Hz, 1 H ), 7.56 ( q, *J* = 8.0 Hz, 4 H ). <sup>13</sup>C NMR ( 100 MHz, CDCl<sub>3</sub> ) δ 195.58, 138.91, 137.20, 135.83, 132.69, 131.49, 129.95, 128.65, 128.42. HRMS *m/z* (ESI) calcd for C<sub>13</sub>H<sub>10</sub>ClO [M+H]<sup>+</sup> 217.0415, found 217.0413.

**(19) 3-chloro-benzophenone (4i)**

Purification by column chromatography (silica gel, ethyl acetate / petroleum ether = 1/15, v/v) afforded as a white solid (95.3mg). m.p. 85–86 °C (lit.<sup>5</sup> mp 85–87 °C); <sup>1</sup>H NMR ( 400 MHz, CDCl<sub>3</sub>, TMS ) δ 7.79 ( d, *J* = 7.6 Hz, 2 H ), 7.78 ( s, 1 H ), 7.67 ( d, *J* = 6.8 Hz, 1 H ), 7.62 ( t, *J* = 7.6 Hz, 1 H ), 7.57 ( d, *J* = 8.0 Hz, 1 H ), 7.50 ( t, *J* = 7.2 Hz, 2 H ), 7.43 ( t, *J* = 8.0 Hz, 1 H ). <sup>13</sup>C NMR ( 100 MHz, CDCl<sub>3</sub> ) δ 195.31,

139.23, 136.92, 134.56, 132.88, 132.39, 130.05, 129.92, 129.66, 128.48, 128.14.  
HRMS m/z (ESI) calcd for C<sub>13</sub>H<sub>10</sub>ClO [M+H]<sup>+</sup> 217.0415, found 217.0410.

**(20) 2-chlorobenzophenone (4j)**

Purification by column chromatography (silica gel, ethyl acetate / petroleum ether = 1/20, v/v) afforded as a white solid (88.8mg). m.p. 44–46 °C (lit.<sup>1</sup> mp 43–45 °C); <sup>1</sup>H NMR ( 400 MHz, CDCl<sub>3</sub>, TMS ) δ 7.80 ( d, *J* = 8.4 Hz, 2 H ), 7.60 ( t, *J* = 7.6 Hz, 1 H ), 7.41-7.49 ( m, 4 H ), 7.35-7.38 ( m, 2 H ). <sup>13</sup>C NMR ( 100 MHz, CDCl<sub>3</sub> ) δ 195.61, 138.61, 136.47, 133.72, 131.33, 131.15, 130.08, 129.13, 128.62, 126.70. HRMS m/z (ESI) calcd for C<sub>13</sub>H<sub>10</sub>ClO [M+H]<sup>+</sup> 217.0415, found 217.0409.

**(21) 2,3,4,5,6-pentamethyl-benzophenone (4k)**

Purification by column chromatography (silica gel, ethyl acetate / petroleum ether = 1/20, v/v) afforded as a white solid (61.7mg). m.p. 136–137 °C (lit.<sup>10</sup> mp 135–136 °C); <sup>1</sup>H NMR ( 400 MHz, CDCl<sub>3</sub>, TMS ) δ 7.82 ( d, *J* = 7.2 Hz, 2 H ), 7.56 ( t, *J* = 7.2 Hz, 1 H ), 7.43 ( t, *J* = 7.2 Hz, 2 H ), 2.28 ( s, 3 H ), 2.20 ( s, 6 H ), 2.02 ( s, 6 H ). <sup>13</sup>C NMR ( 100 MHz, CDCl<sub>3</sub> ) δ 201.98, 137.68, 135.56, 133.44, 132.91, 129.55, 129.03, 128.73, 17.57, 16.79, 15.98. HRMS m/z (ESI) calcd for C<sub>18</sub>H<sub>21</sub>O [M+H]<sup>+</sup> 253.1587, found 253.1586.

**(22) 2,3,4,5,6-perfluoro-benzophenone (4l)**

Purification by column chromatography (silica gel, ethyl acetate / petroleum ether = 1/15, v/v) afforded as a white solid (83.0mg). m.p. 34–35 °C (lit.<sup>11</sup> mp 33–34 °C); <sup>1</sup>H NMR ( 400 MHz, CDCl<sub>3</sub>, TMS ) δ 7.87 ( d, *J* = 7.6 Hz, 2 H ), 7.70 ( t, *J* = 7.6 Hz, 1 H ), 7.55 ( t, *J* = 7.6 Hz, 2 H ). <sup>13</sup>C NMR ( 100 MHz, CDCl<sub>3</sub> ) δ 185.33, 135.94, 135.04, 129.70, 129.11. HRMS m/z (ESI) calcd for C<sub>13</sub>H<sub>5</sub>F<sub>5</sub>O [M+H]<sup>+</sup> 273.0333, found 273.0331.

**(23) 1-naphthyl-benzophenone (4m)**

Purification by column chromatography (silica gel, ethyl acetate / petroleum ether = 1/15, v/v) afforded as a white solid (95.1mg). m.p. 77–78 °C (lit.<sup>3</sup> mp 76–77 °C); <sup>1</sup>H NMR ( 400 MHz, CDCl<sub>3</sub>, TMS ) δ 8.10 ( d, *J* = 7.6 Hz, 1 H ), 8.00 ( d, *J* = 8.4 Hz, 1 H ), 7.91 ( d, *J* = 7.2 Hz, 1 H ), 7.87 ( d, *J* = 7.2 Hz, 2 H ), 7.42-7.61 ( m, 7 H ). <sup>13</sup>C NMR ( 100 MHz, CDCl<sub>3</sub> ) δ 198.07, 138.30, 136.33, 133.73, 133.29, 131.32, 130.96,



130.45, 128.48, 128.44, 127.83, 127.30, 126.50, 125.70, 124.37. HRMS  $m/z$  (ESI) calcd for  $C_{17}H_{13}O$   $[M+H]^+$  233.0961, found 233.0961.

**(24) 3-benzoylpyridine (4n)**

Purification by column chromatography (silica gel, ethyl acetate / petroleum ether = 1/15, v/v) afforded as a yellow solid (76.9mg). m.p. 40–41 °C (lit.<sup>12</sup> mp 40-41 °C);  $^1H$  NMR ( 400 MHz,  $CDCl_3$ , TMS )  $\delta$  8.99 ( s, 1 H ), 8.81 ( d,  $J = 4.8$  Hz, 1 H ), 8.12 ( d,  $J = 8.0$  Hz, 1 H ), 7.44-7.83 ( m, 6 H ).  $^{13}C$  NMR ( 100 MHz,  $CDCl_3$  )  $\delta$  194.85, 152.83, 150.91, 137.17, 136.63, 133.17, 133.10, 130.00, 128.60, 123.35. HRMS  $m/z$  (ESI) calcd for  $C_{12}H_{10}NO$   $[M+H]^+$  184.0757, found 184.0750.

**(25) propiophenone (4o)**

Purification by column chromatography (silica gel, ethyl acetate / petroleum ether = 1/50, v/v) afforded as colorless liquid (36.2mg).  $^1H$  NMR ( 400 MHz,  $CDCl_3$ , TMS )  $\delta$  7.90 ( d,  $J = 7.6$  Hz, 2 H ), 7.48 ( t,  $J = 7.6$  Hz, 1 H ), 7.38 ( t,  $J = 7.6$  Hz, 2 H ), 2.93 ( q,  $J = 7.2$  Hz, 2 H ), 1.15 ( t,  $J = 7.2$  Hz, 3 H ).  $^{13}C$  NMR ( 100 MHz,  $CDCl_3$  )  $\delta$  200.62, 136.86, 132.81, 128.48, 127.90, 31.69, 8.16. HRMS  $m/z$  (ESI) calcd for  $C_9H_{11}O$   $[M+H]^+$  135.0804, found 135.0802.

**(26) pentanophenone (4p)**

Purification by column chromatography (silica gel, ethyl acetate / petroleum ether = 1/50, v/v) afforded as colorless liquid (53.5mg).  $^1H$  NMR ( 400 MHz,  $CDCl_3$ , TMS )  $\delta$  7.94 ( d,  $J = 7.2$  Hz, 2 H ), 7.53 ( t,  $J = 7.2$  Hz, 1 H ), 7.42 ( t,  $J = 7.6$  Hz, 2 H ), 2.95 ( t,  $J = 7.6$  Hz, 2 H ), 1.67-1.75 ( m, 2 H ), 1.37-1.43 ( m, 2 H ), 0.94 ( t,  $J = 7.2$  Hz, 3 H ).  $^{13}C$  NMR ( 100 MHz,  $CDCl_3$  )  $\delta$  200.47, 137.05, 132.84, 128.52, 128.01, 38.29, 26.45, 22.48, 13.94. HRMS  $m/z$  (ESI) calcd for  $C_{11}H_{15}O$   $[M+H]^+$  163.1117, found 163.1109.

**(27) isobutyrophenone (4q)**

Purification by column chromatography (silica gel, ethyl acetate / petroleum ether = 1/50, v/v) afforded as colorless liquid (55.5mg).  $^1H$  NMR ( 400 MHz,  $CDCl_3$ , TMS )  $\delta$  7.95 ( d,  $J = 7.6$  Hz, 2 H ), 7.53 ( t,  $J = 7.2$  Hz, 1 H ), 7.44 ( t,  $J = 7.2$  Hz, 2 H ), 3.55 ( m, 1 H ), 1.21 ( d,  $J = 6.8$  Hz, 6 H ).  $^{13}C$  NMR (100 MHz,  $CDCl_3$  )  $\delta$  204.38, 136.16, 132.77, 128.58, 128.28, 35.29, 19.12. HRMS  $m/z$  (ESI) calcd for  $C_{10}H_{13}O$   $[M+H]^+$

149.0961, found 149.0957.

**(28) cyclopentyl(phenyl)methanone (4r)**

Purification by column chromatography (silica gel, ethyl acetate / petroleum ether = 1/50, v/v) afforded as colorless liquid (69.6mg). <sup>1</sup>H NMR ( 400 MHz, CDCl<sub>3</sub>, TMS ) δ 7.97 ( d, *J* = 7.2 Hz, 2 H ), 7.53 ( t, *J* = 7.2 Hz, 1 H ), 7.44 ( t, *J* = 7.2 Hz, 2 H ), 3.66-3.75 ( m, 1 H ), 1.86-1.94 ( m, 4 H ), 1.60-1.77 ( m, 4 H ). <sup>13</sup>C NMR (100 MHz, CDCl<sub>3</sub> ) δ 202.75, 136.90, 132.69, 128.49, 128.44, 46.33, 29.96, 26.32. HRMS m/z (ESI) calcd for C<sub>12</sub>H<sub>15</sub>O [M+H]<sup>+</sup> 175.1117, found 175.1109.

**(29) benzoylacetone (4s)**

Purification by column chromatography (silica gel, ethyl acetate / petroleum ether = 1/30, v/v) afforded as colorless liquid (20.3mg). <sup>1</sup>H NMR ( 400 MHz, CDCl<sub>3</sub>, TMS ) δ 7.87 ( d, *J* = 7.2 Hz, 2 H ), 7.51 ( t, *J* = 7.2 Hz, 1 H ), 7.44 ( t, *J* = 7.2 Hz, 2 H ), 6.17 ( s, 2 H ), 2.19 ( s, 3 H ). <sup>13</sup>C NMR (100 MHz, CDCl<sub>3</sub> ) δ 193.78, 183.34, 134.88, 132.29, 128.83, 128.61, 127.00, 96.70, 25.84. HRMS m/z (ESI) calcd for C<sub>10</sub>H<sub>11</sub>O<sub>2</sub> [M+H]<sup>+</sup> 163.0754, found 163.0749.

**(30) 1,2-diphenylethanone (4t)**

Purification by column chromatography (silica gel, ethyl acetate / petroleum ether = 1/20, v/v) afforded as a white solid (81.3mg). m.p. 55–56 °C (lit.<sup>13</sup> mp 55–56 °C); <sup>1</sup>H NMR ( 400 MHz, CDCl<sub>3</sub>, TMS ) δ 8.01 ( d, *J* = 7.8 Hz, 2 H ), 7.54 ( t, *J* = 7.2 Hz, 1 H ), 7.44 ( t, *J* = 7.2 Hz, 2 H ), 7.22-7.34 ( m, 5 H ), 4.28 ( s, 3 H ). <sup>13</sup>C NMR ( 100 MHz, CDCl<sub>3</sub> ) δ 197.64, 136.62, 134.57, 133.19, 129.50, 128.70, 128.67, 128.64, 126.91, 45.52. HRMS m/z (ESI) calcd for C<sub>14</sub>H<sub>13</sub>O [M+H]<sup>+</sup> 197.0961, found 197.0962.

**Reference**

1. G. Liu and M. Cai, *Catal. Commun.* 2007, 8, 251.
2. K. O. Jeon, J. H. Jun, J. S. Yu and C. K. J. Lee, *Heter. Chem.* 2003, 40, 763.
3. W. Qin, S. Yasuike, N. Kakusawa and J. Kurita, *J. Organomet. Chem.* 2008, 693, 2949.
4. J. R. Bour, J. C. Green, V. J. Winton and J. B. Johnson, *J. Org. Chem.* 2013, 78, 1665.
5. J. Magano, M. H. Chen, J. D. Clark and T. Nussbaumer, *J. Org. Chem.* 2006, 71, 7103.
6. M. Cai, G. Zheng, L. Zha and J. Peng, *Eur. J. Org. Chem.* 2009, 1585.

7. G. W. Ebert, W. L. Juda, R. H. Kosakowski, B. Ma, L. Dong, K. E. Cummings, M. V. B. Phelps, A. E. Mostafa and J. Luo, *J. Org. Chem.* 2005, 70, 4314.
8. T.-S. Jin, M.-N. Yang, G.-L. Feng and T.-S. Li, *Synth. Commun.* 2004, 34, 479.
9. C. Jin, L. Zhang, W. Su and C. Jin, *Synlett* 2011, 1435.
10. R. C. Fuson, B. C. McKusick and J. Mills, *J. Org. Chem.* 1946, 11, 60.
11. A. K. Barbour, M. W. Buxton, P. L. Coe, R. Stephens and J. C. Tatlow, *J. Chem. Soc.* 1961, 808.
12. E. Maerten, M. Sauthier, A. Mortreux and Y. Castanet, *Tetrahedron* 2006, 63, 682.
13. S.-H. Kim and R. D. Rieke, *J. Org. Chem.* 2000, 65, 2322.

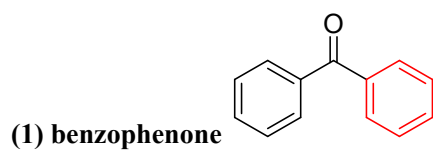

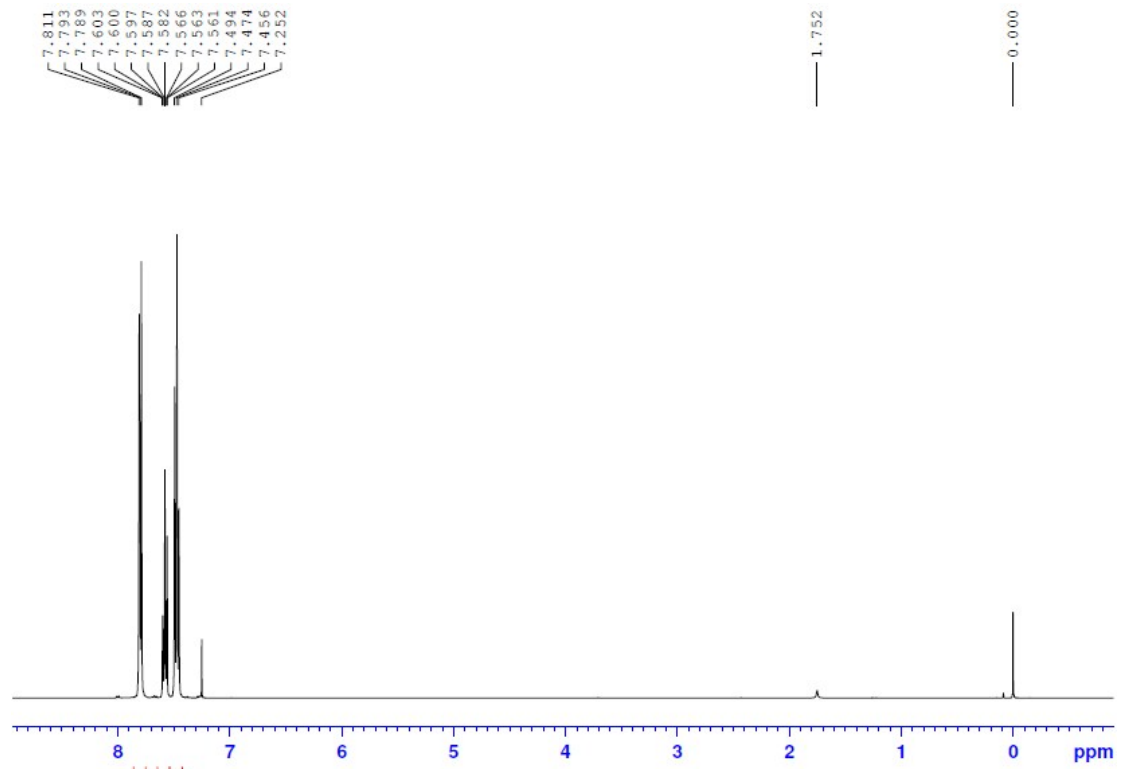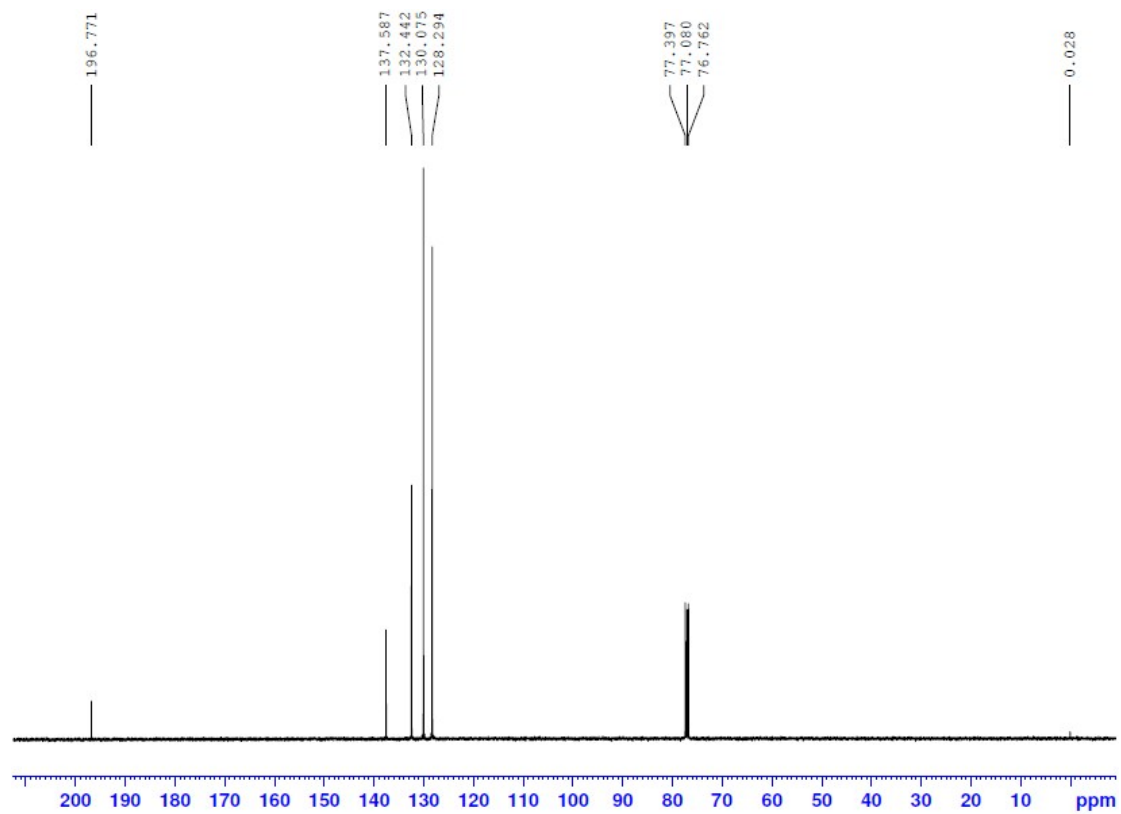

20150715\_APC-H3A #8 RT: 0.11 AV: 1 NL: 5.58E7  
T: FTMS + c APCi corona Full ms [100.00-800.00]

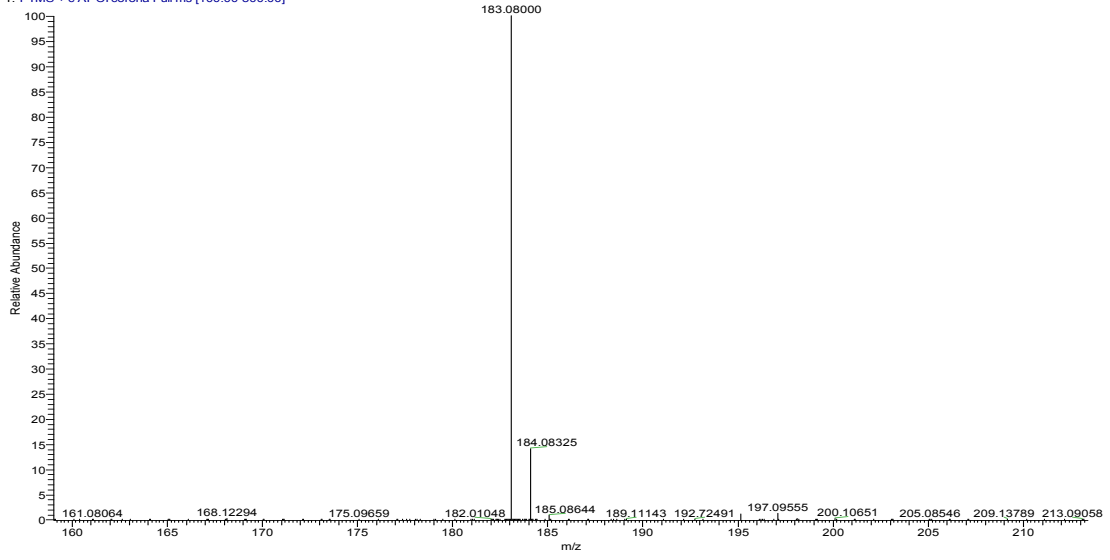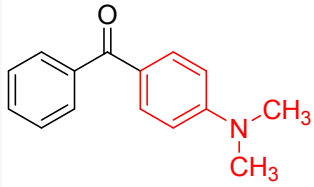

(2) 4-(dimethylamino)benzophenone

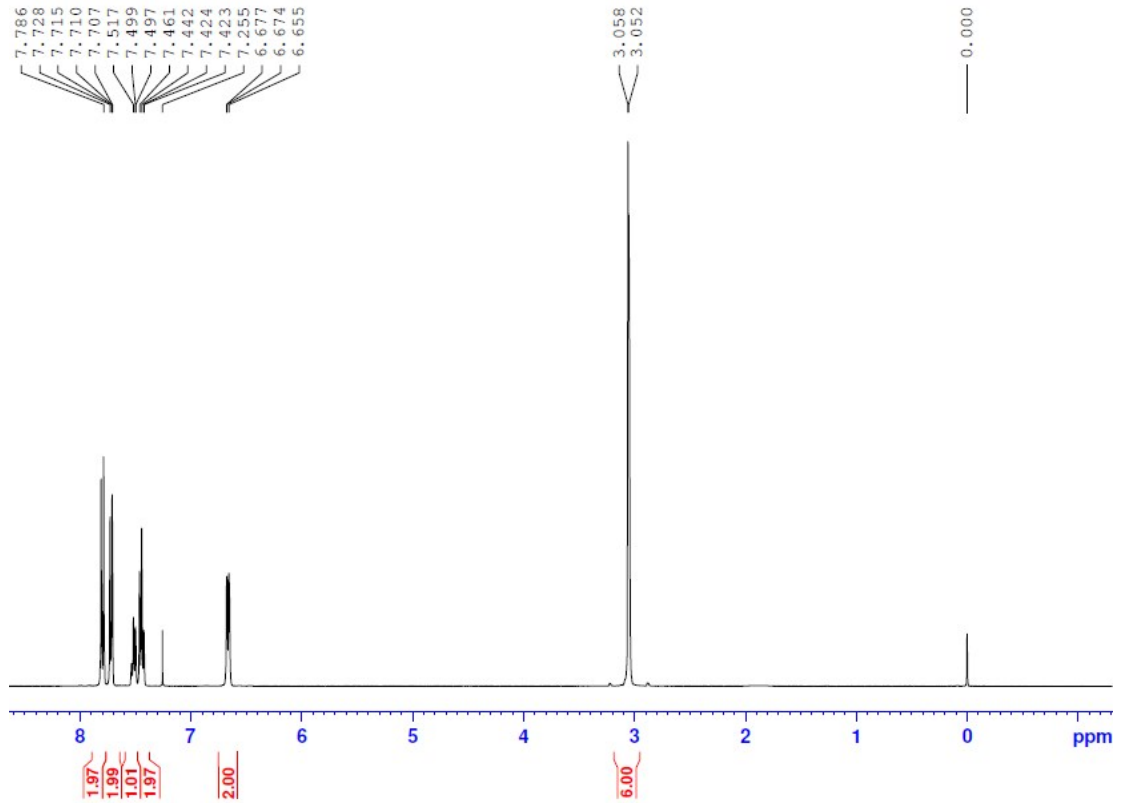

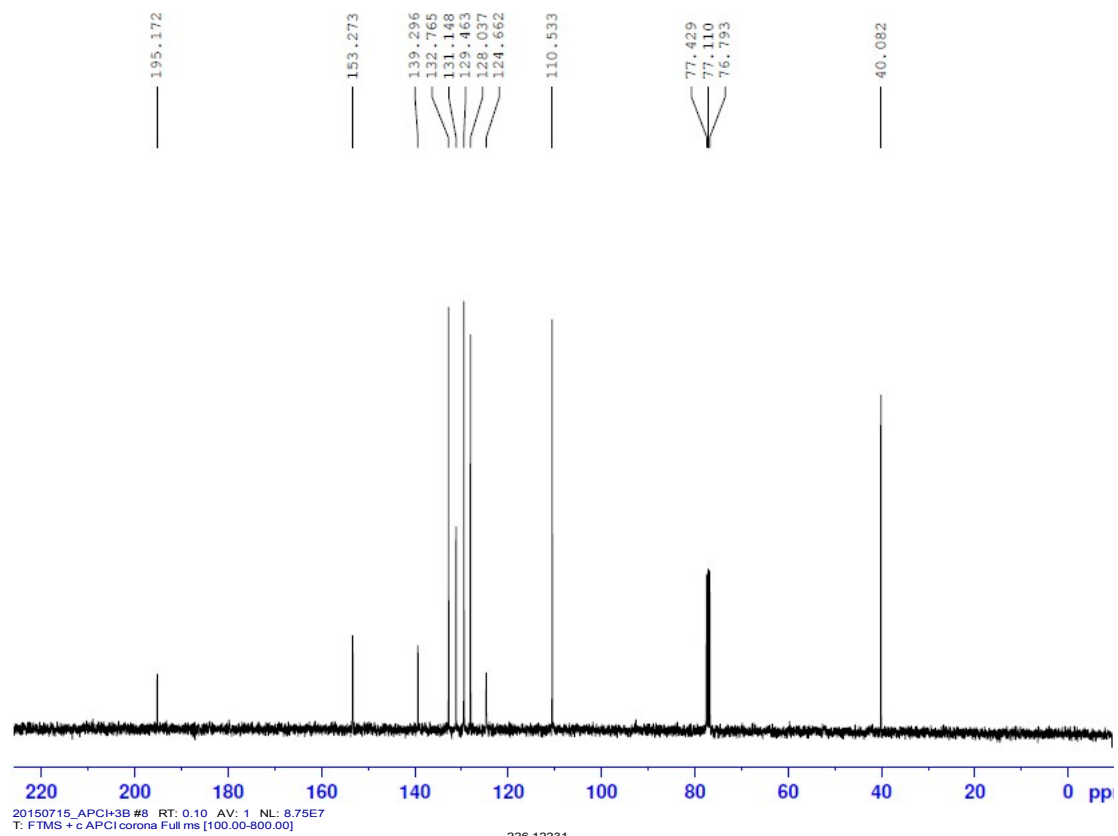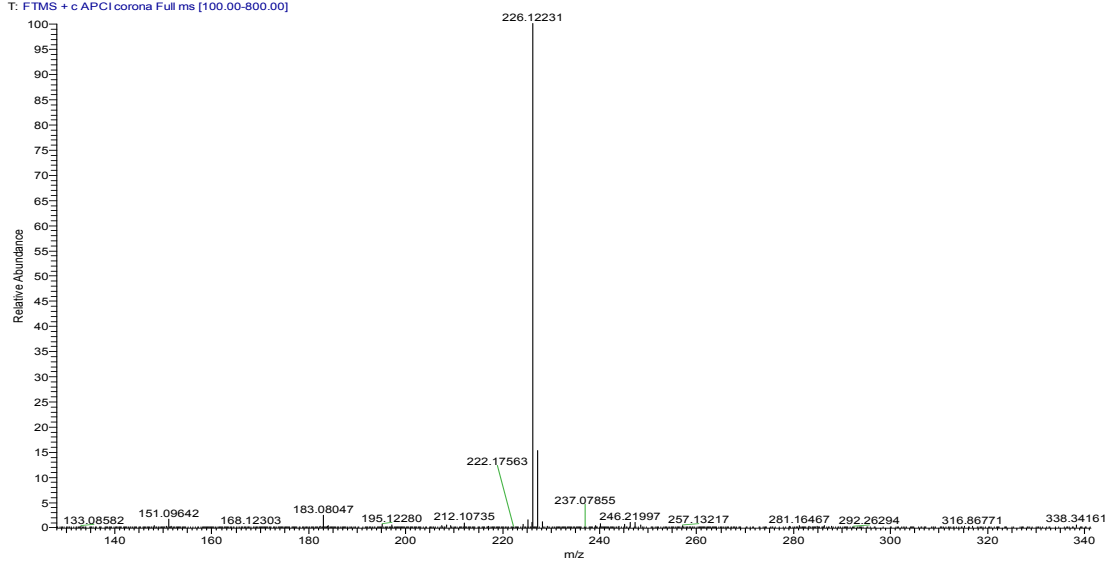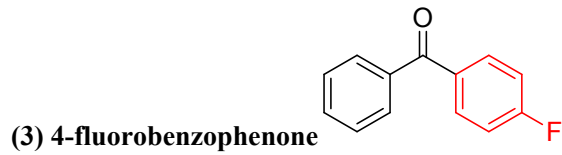

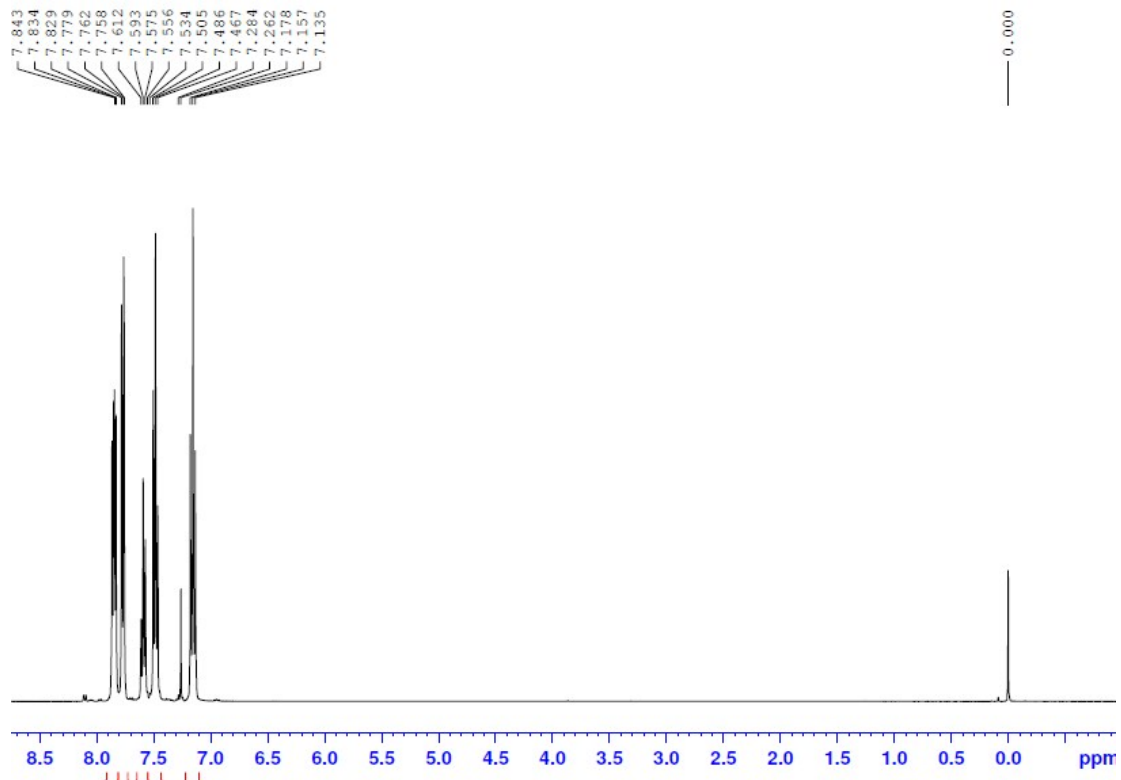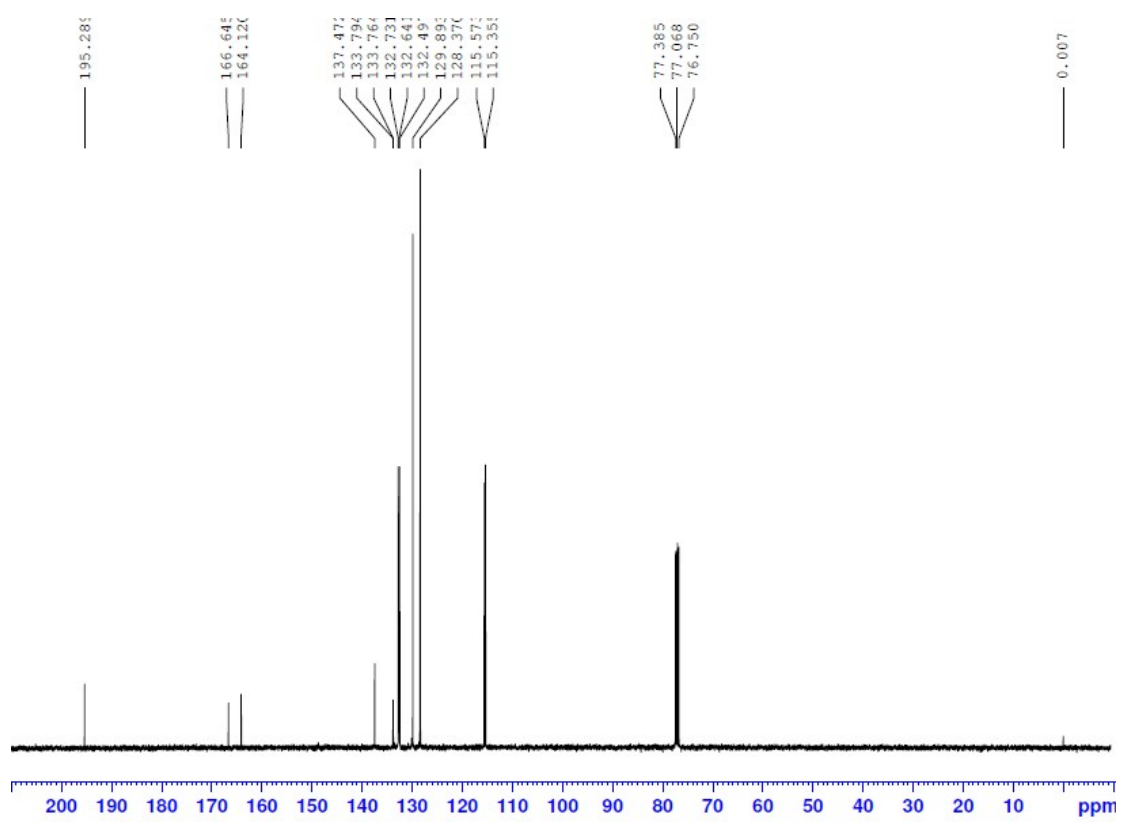

20150715\_APC1-3C #16 RT: 0.22 AV: 1 NL: 7.12E7  
T: FTMS + c APC1 corona Full ms [100.00-800.00]

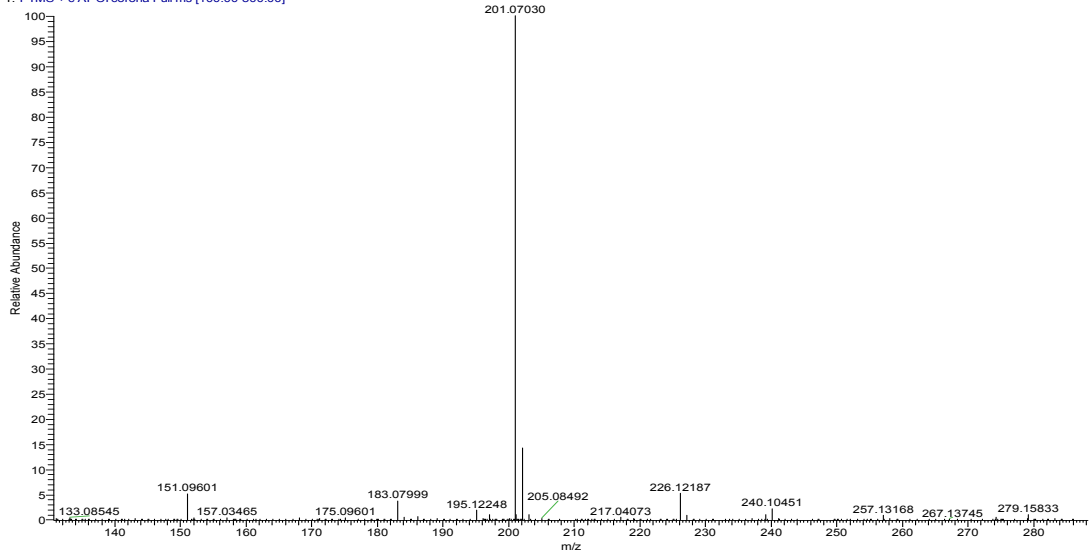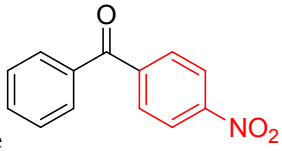

(4) 4-nitroacetophenone

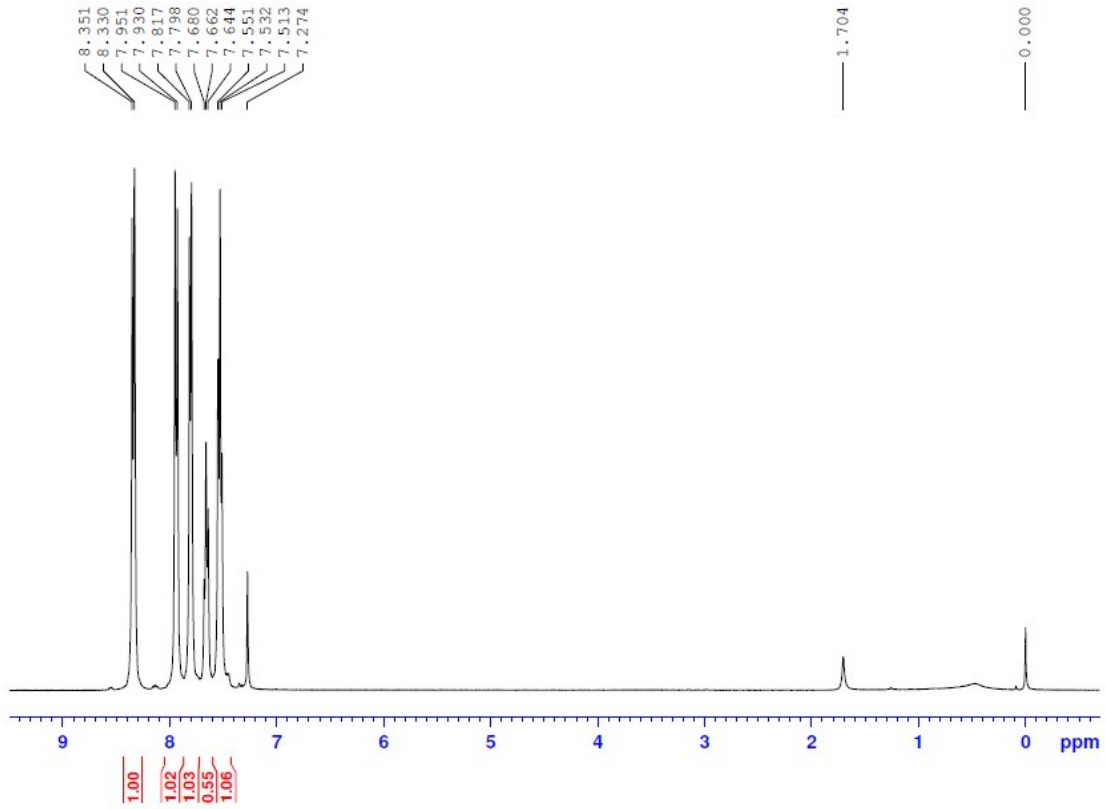



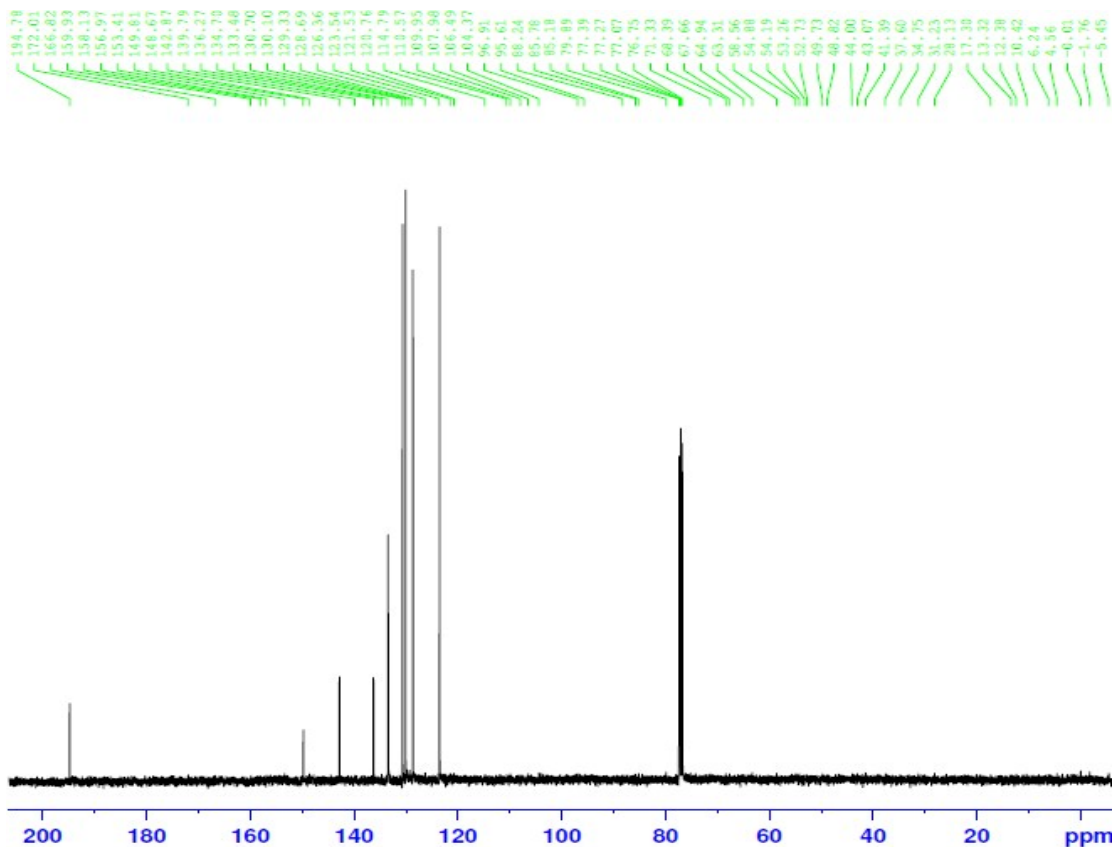

20150715\_APCI-3B#8 RT: 0.10 AV: 1 NL: 8.75E7  
 T: FTMS + c APCI corona Full ms [100.00-800.00]

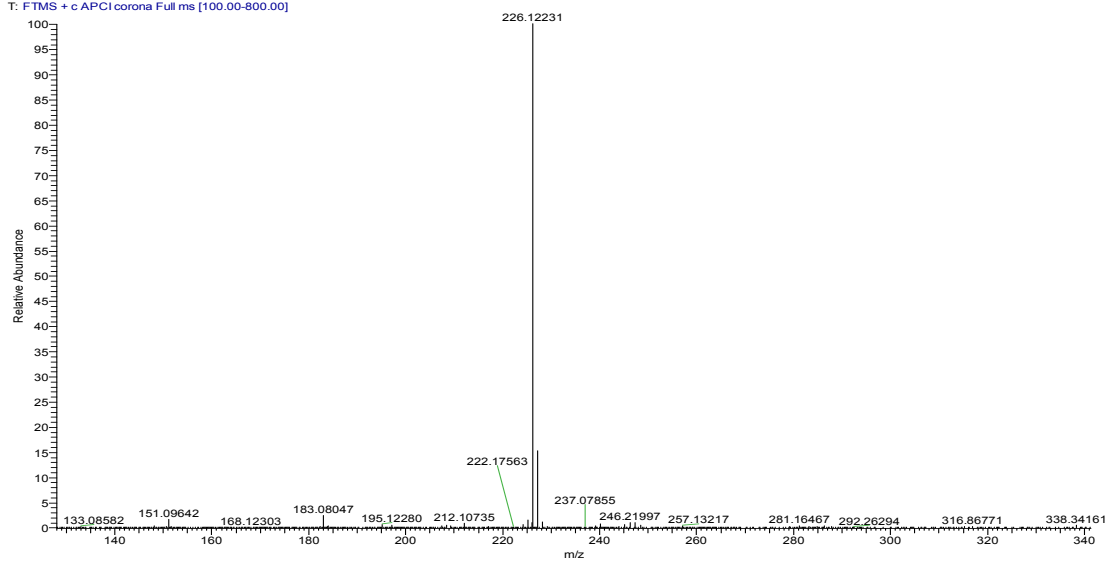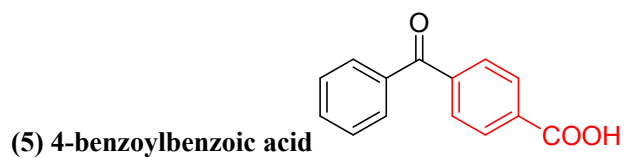

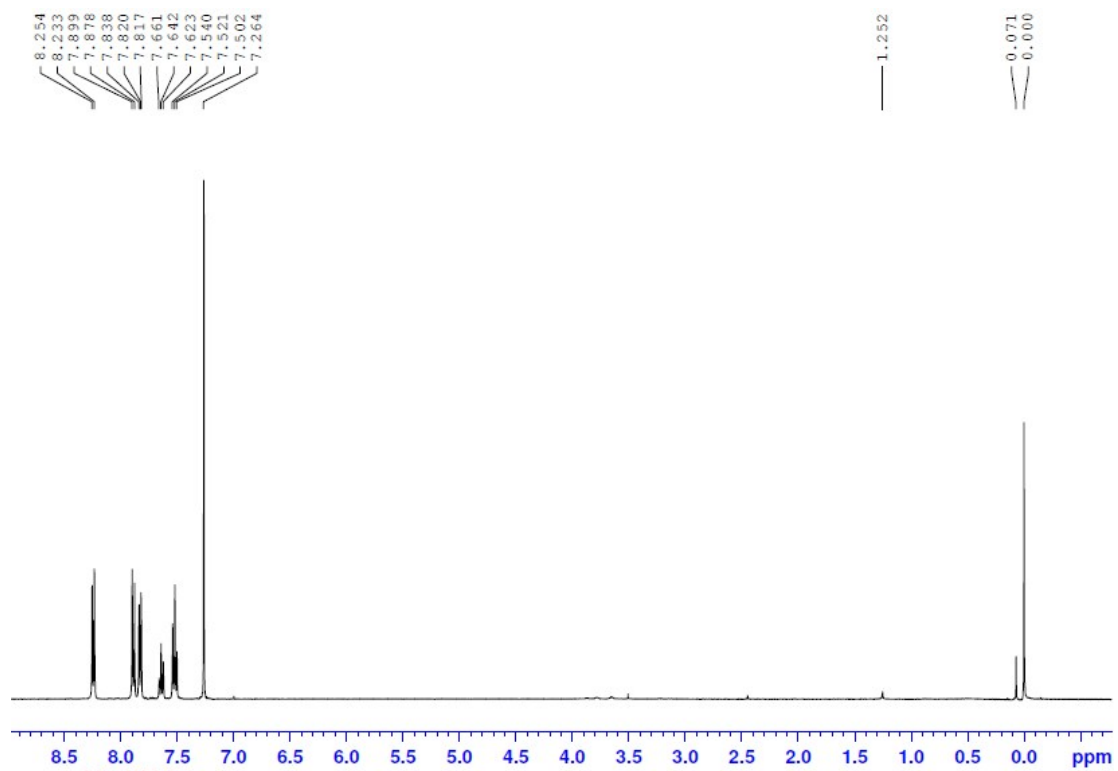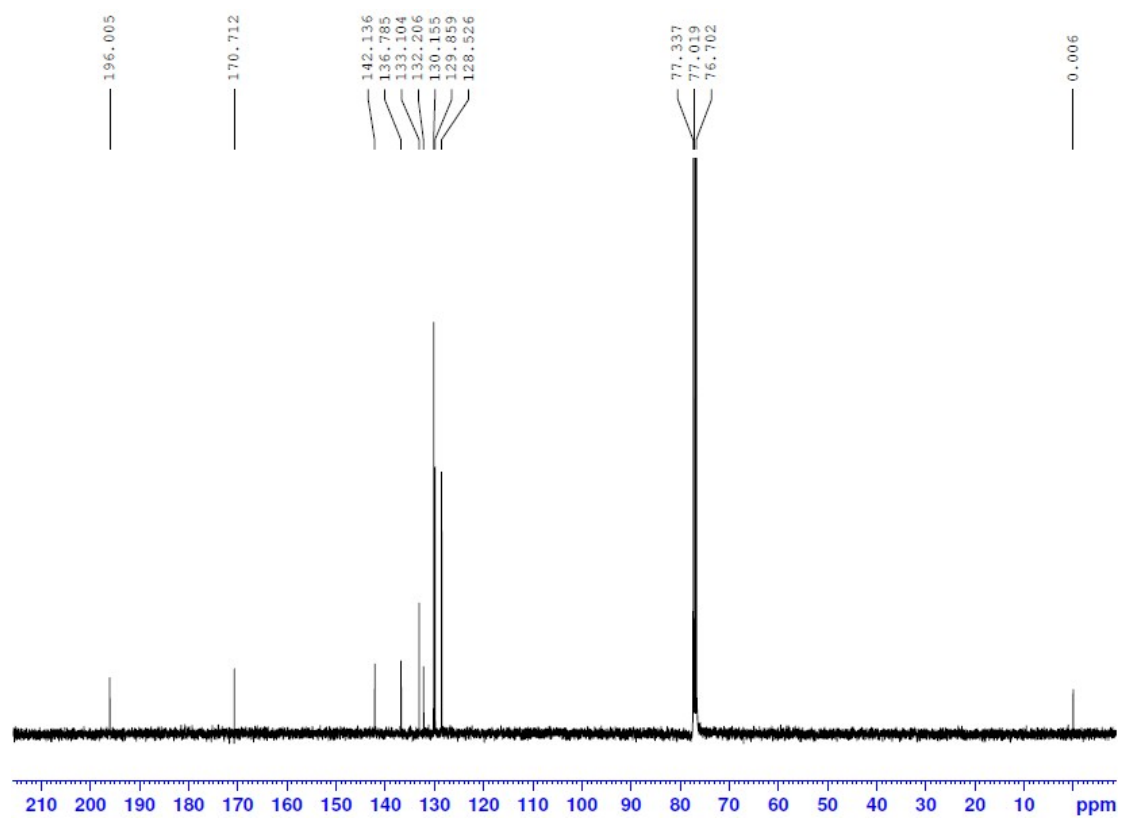

20150715\_APC-H3E #11 RT: 0.15 AV: 1 NL: 2.44E6  
T: FTMS + c APCi corona Full ms [100.00-800.00]

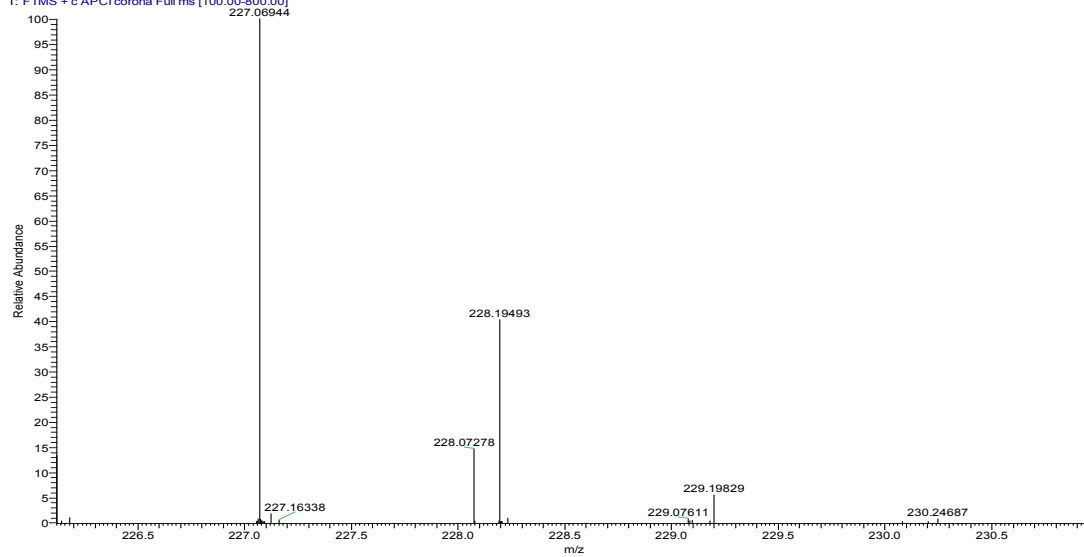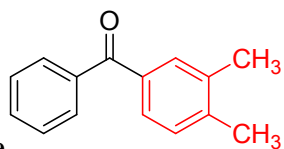

(6) 3,4-dimethylbenzophenone

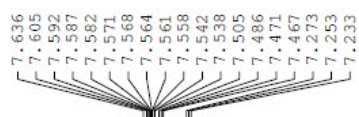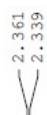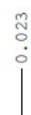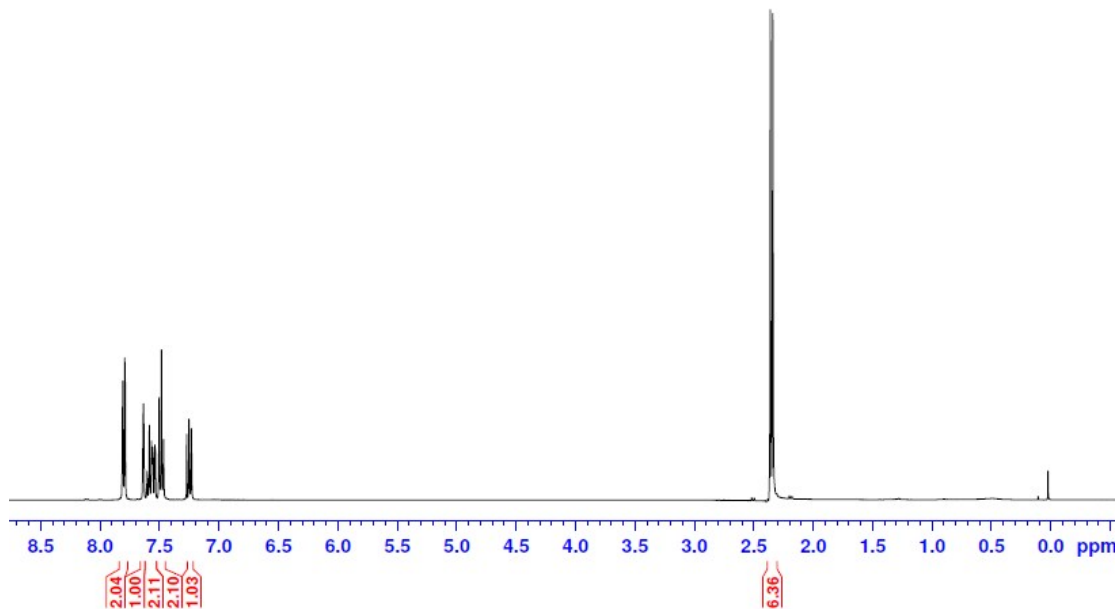

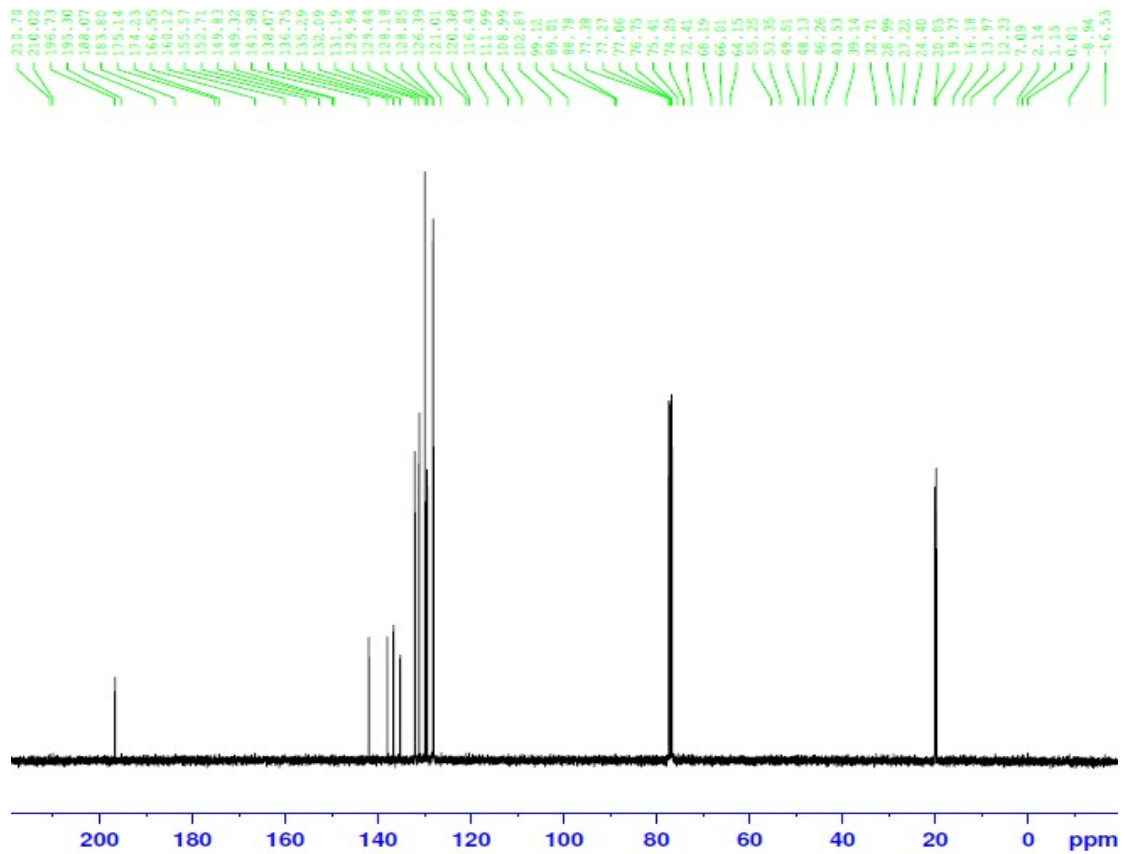

20150715\_APCH-3F#9 RT: 0.12 AV: 1 NL: 6.47E8  
T: FTMS + cAPCI corona Full ms [100.00-800.00]

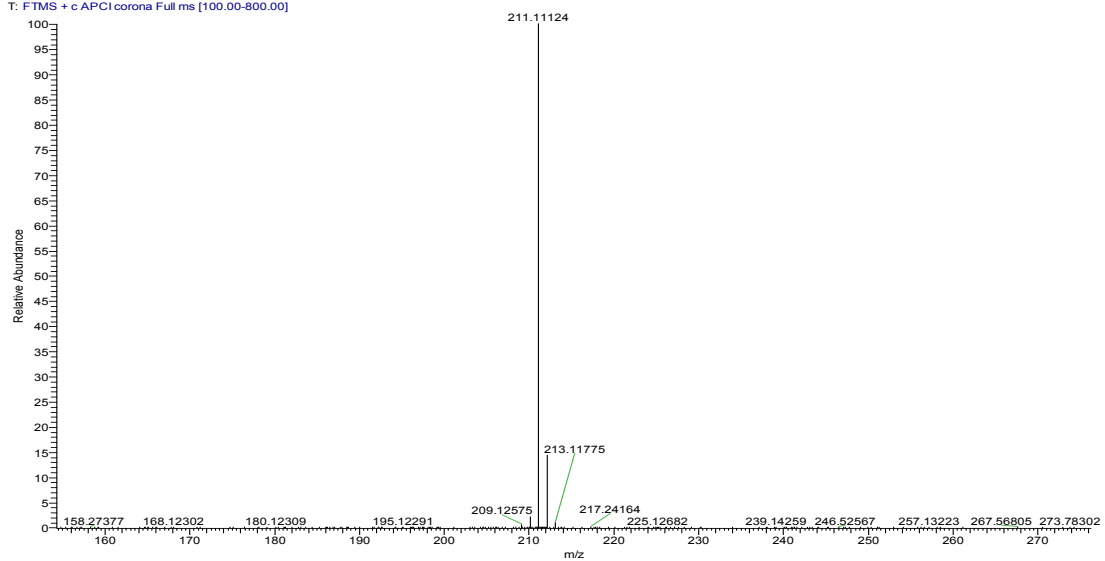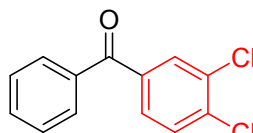

(7) 3,4-dichlorobenzophenone

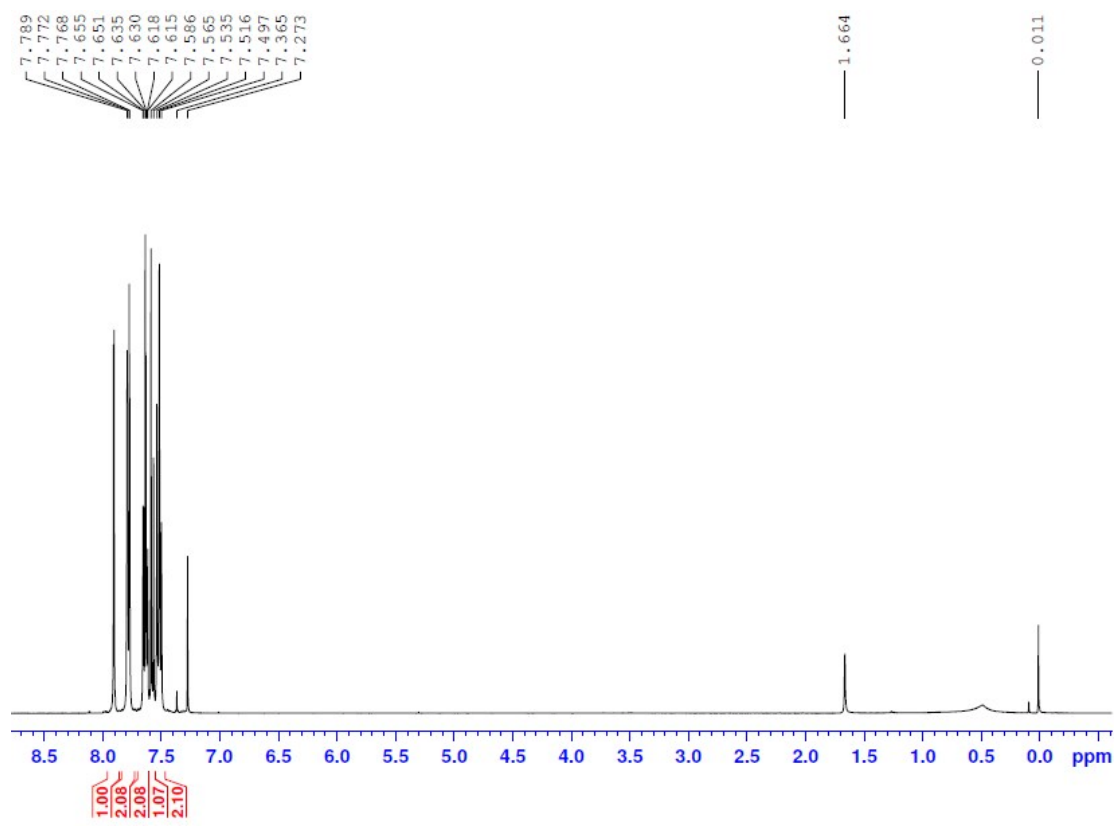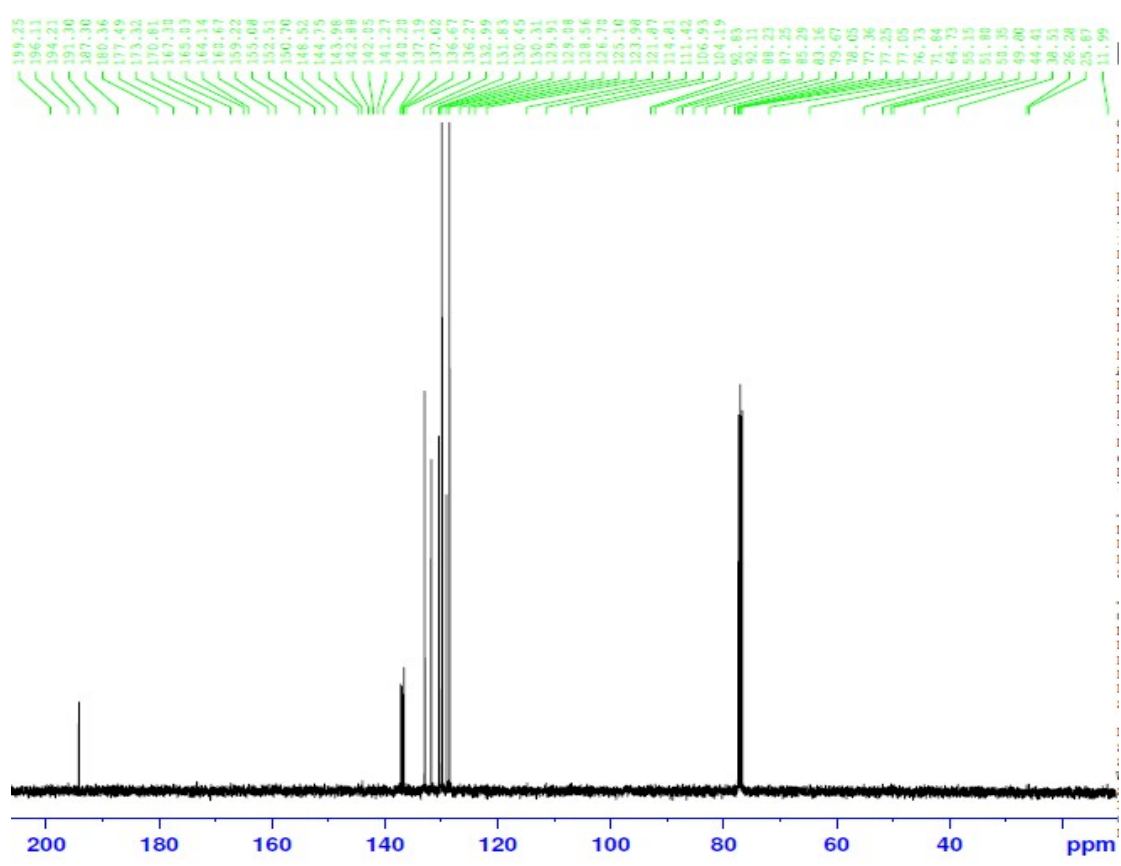

20150715\_APC-H3G #17 RT: 0.24 AV: 1 NL: 3.20E5  
T: FTMS + c APCI corona Full ms [100.00-800.00]

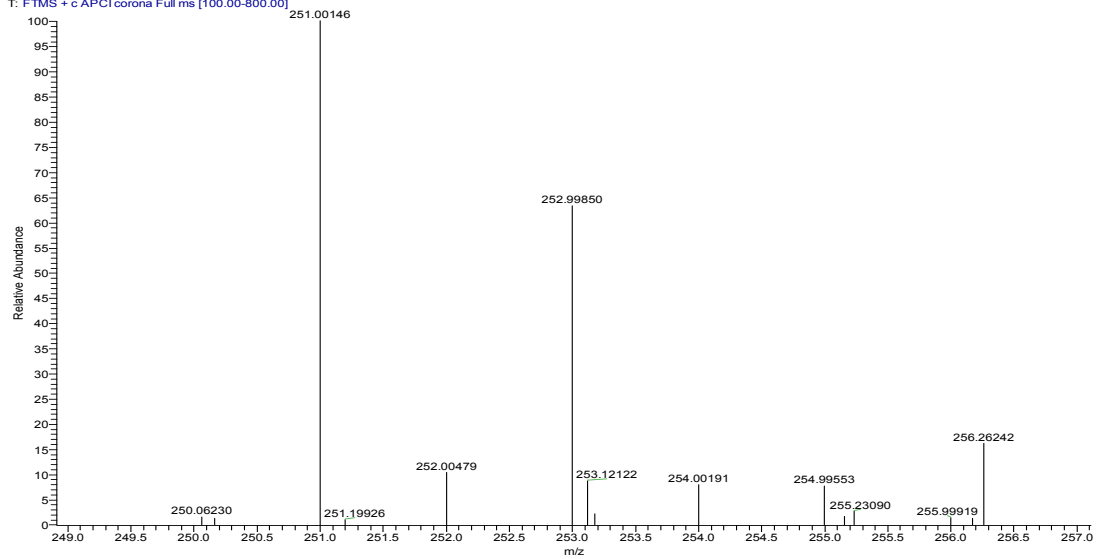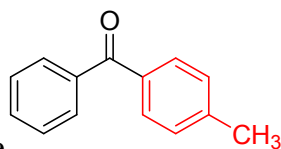

(8) 4-methylbenzophenone

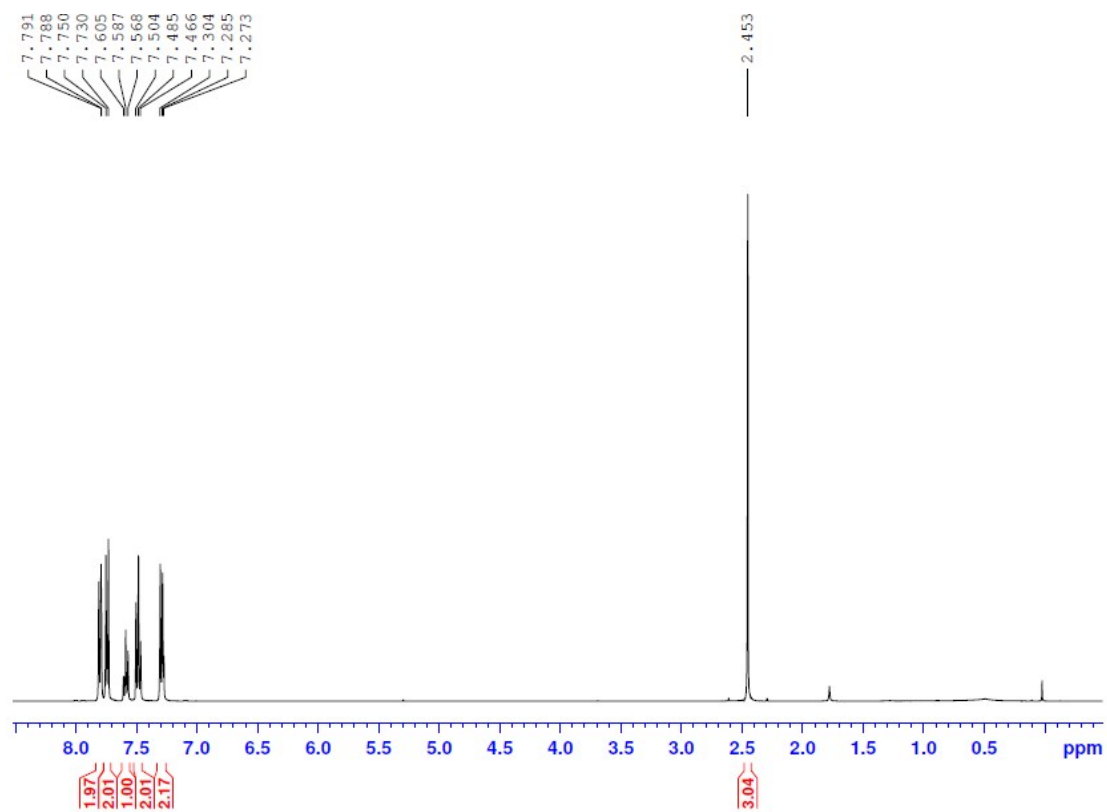

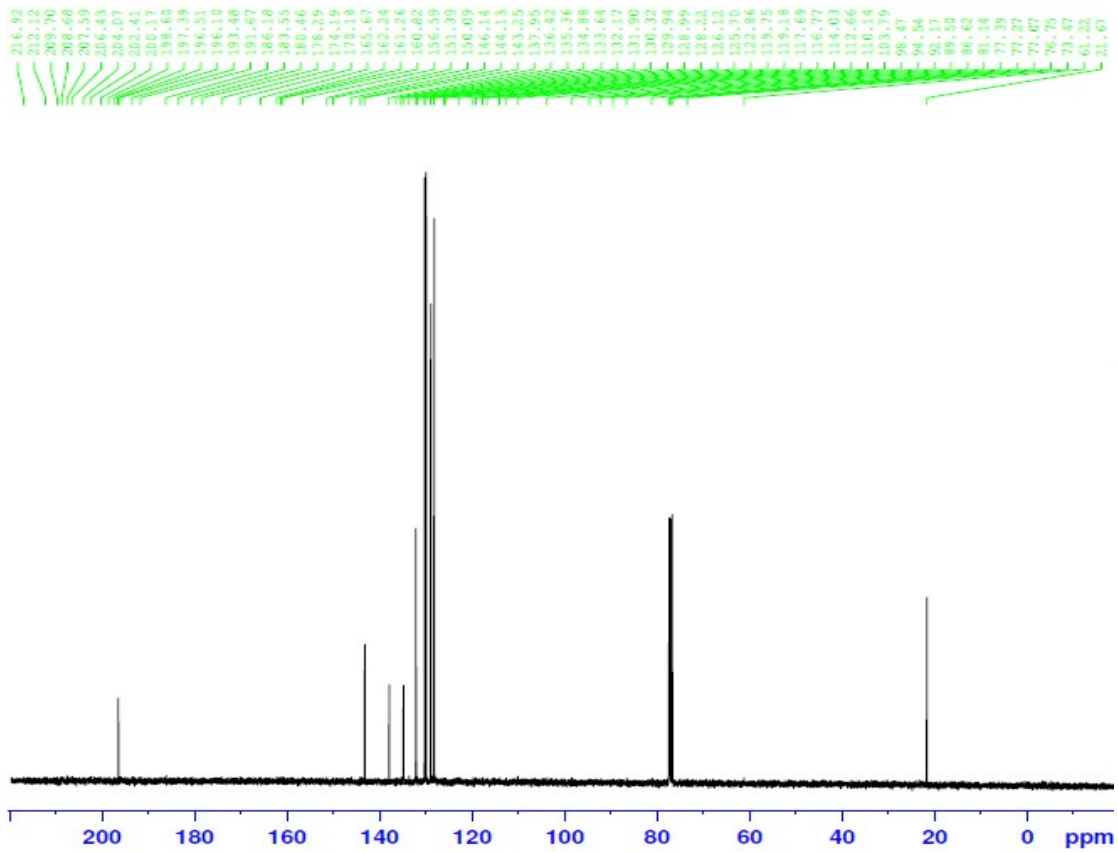

20150710\_HESH-31 #47 RT: 0.66 AV: 1 NL: 2.96E7  
T: FTMS + c ESI Full ms [100.00-800.00]

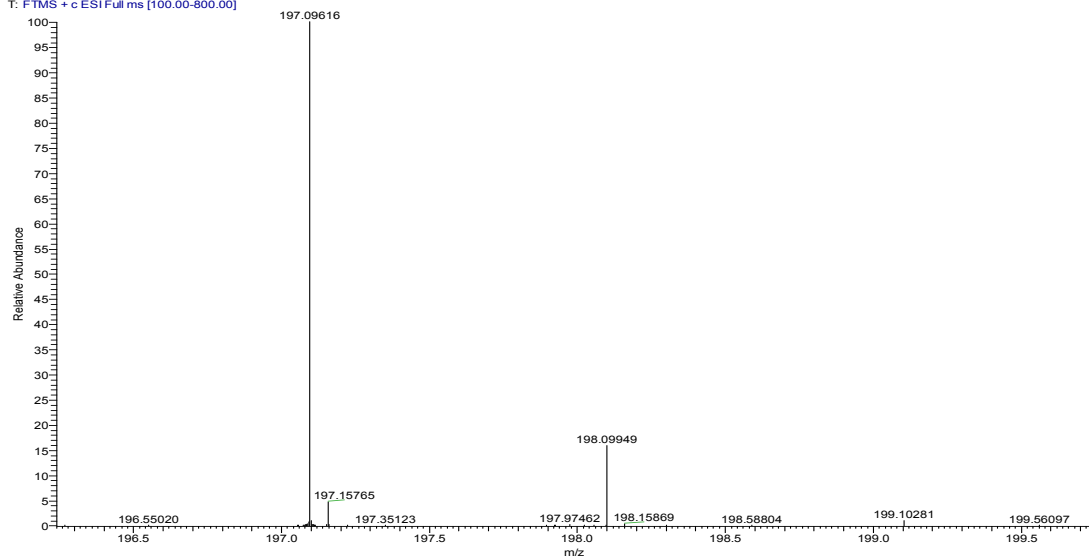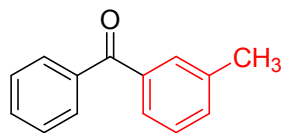

(9) 3-methyl-benzophenone

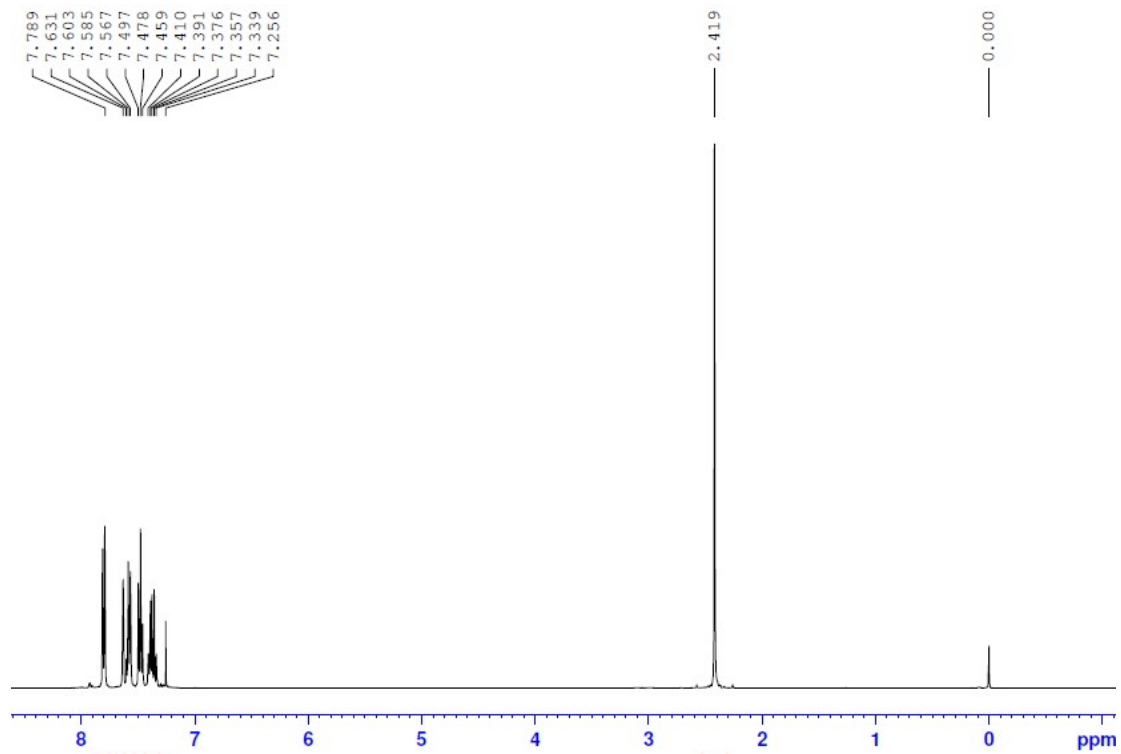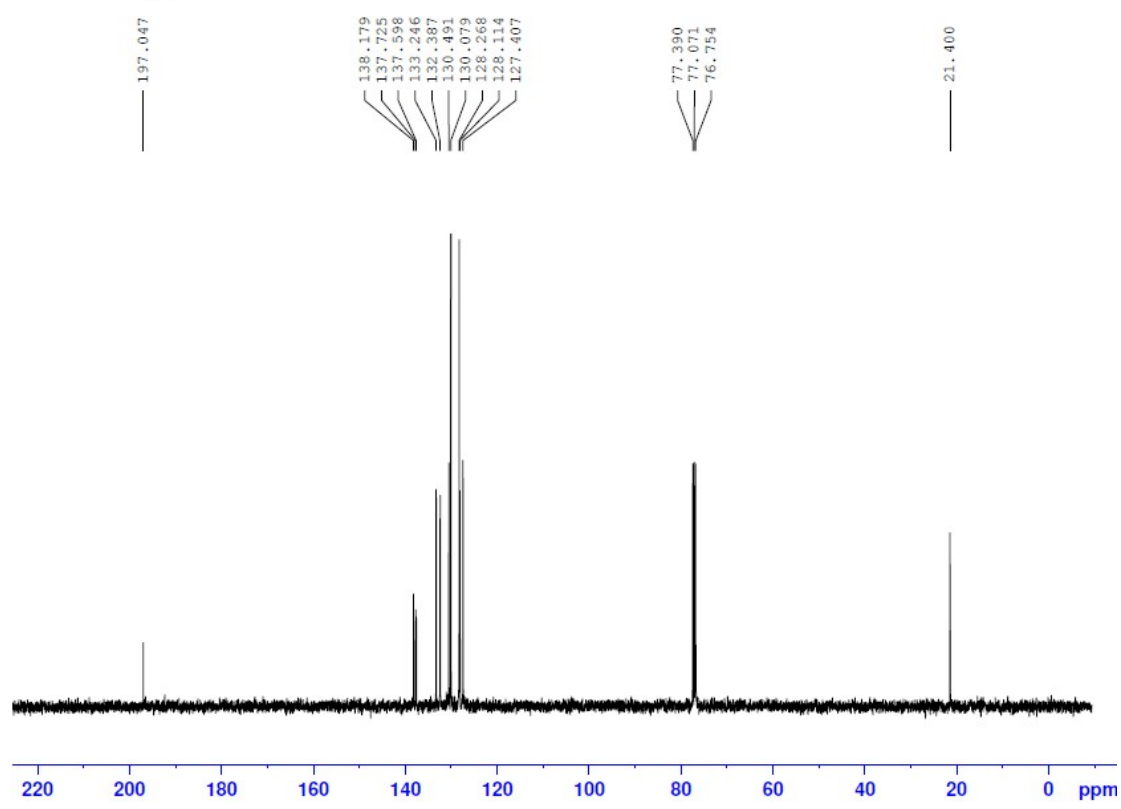



20150715\_APCI+3H #8 RT: 0.11 AV: 1 NL: 9.58E7  
T: FTMS + c APCI corona Full ms [100.00-800.00]

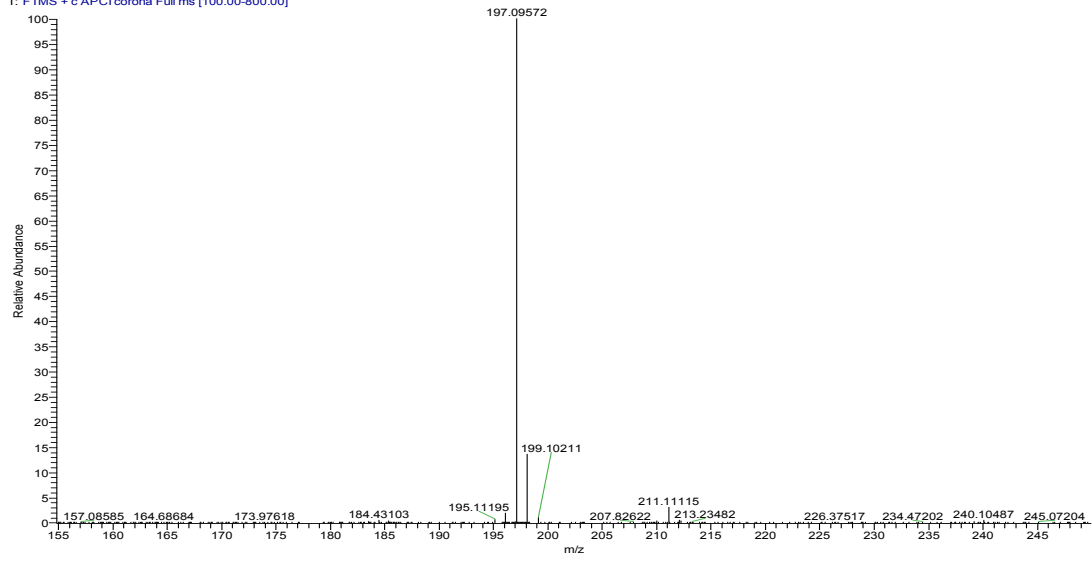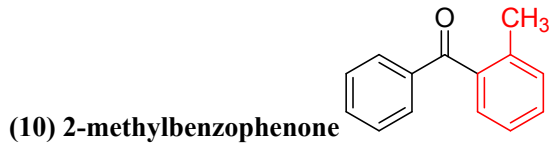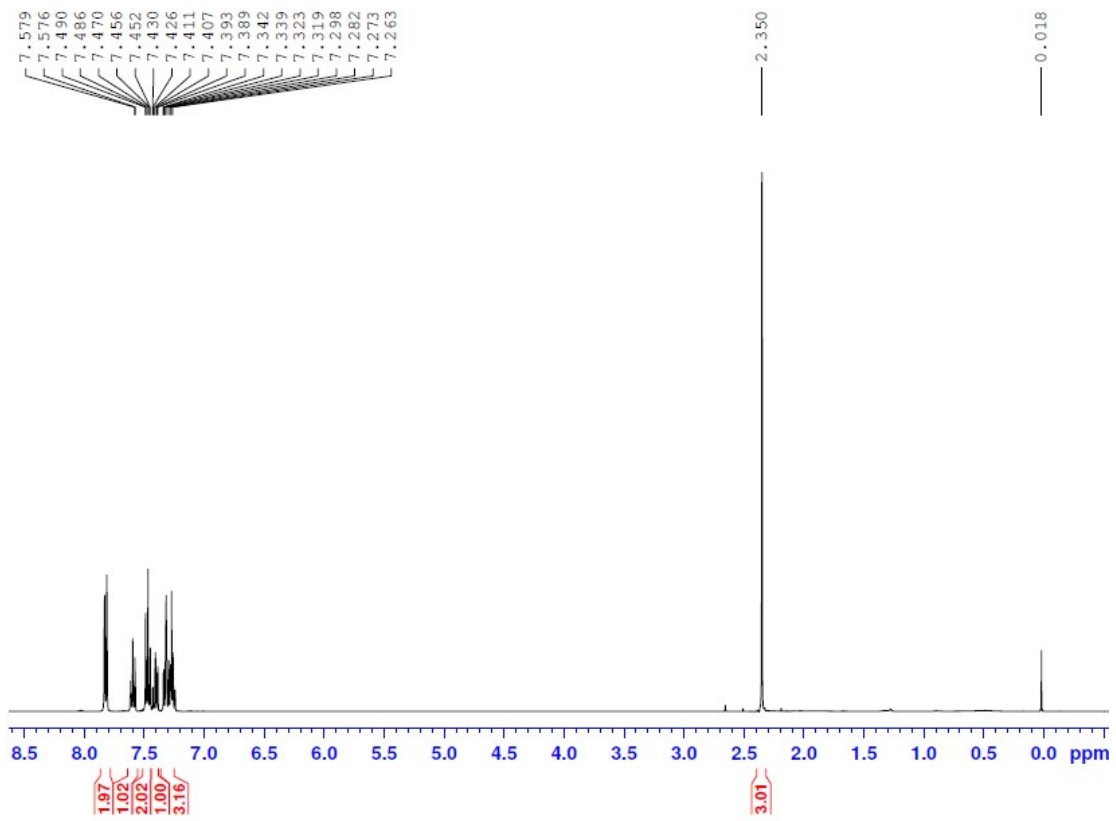

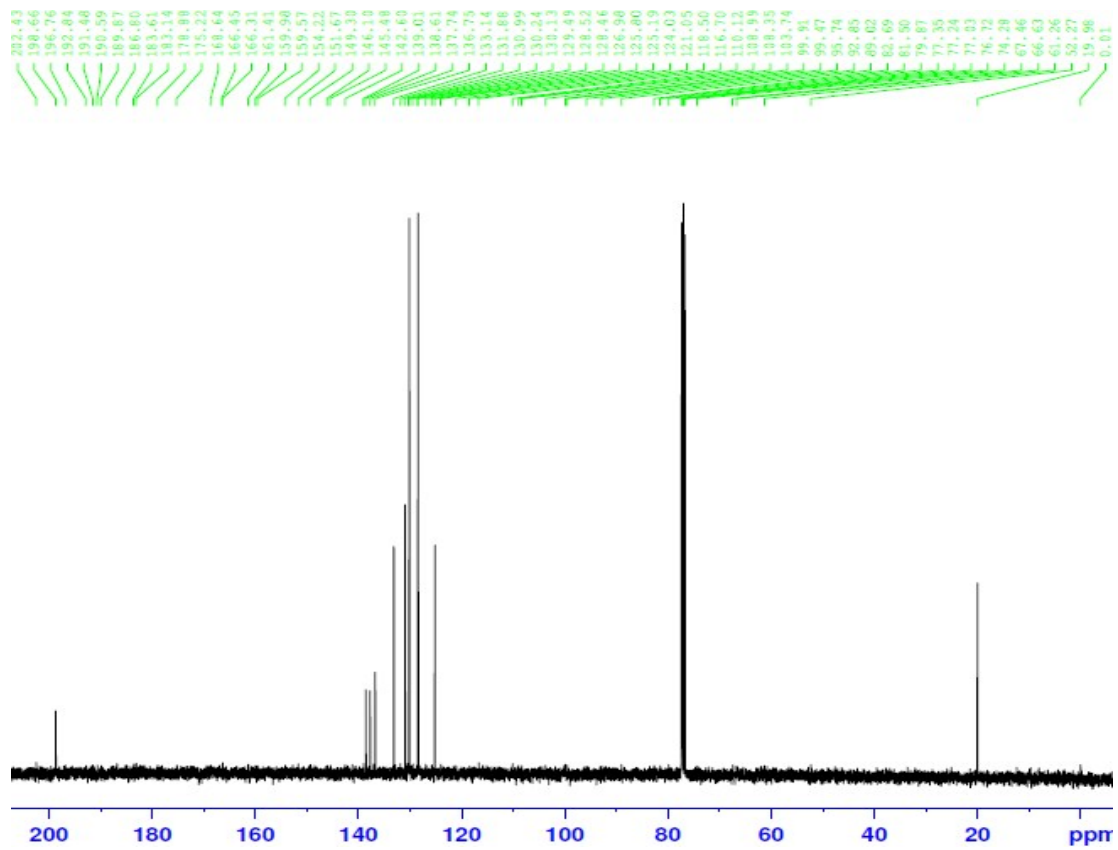

20150715\_APCI-4T#11 RT: 0.15 AV: 1 NL: 9.09E7  
T: FTMS + c APCI corona Full ms [100.00-800.00]

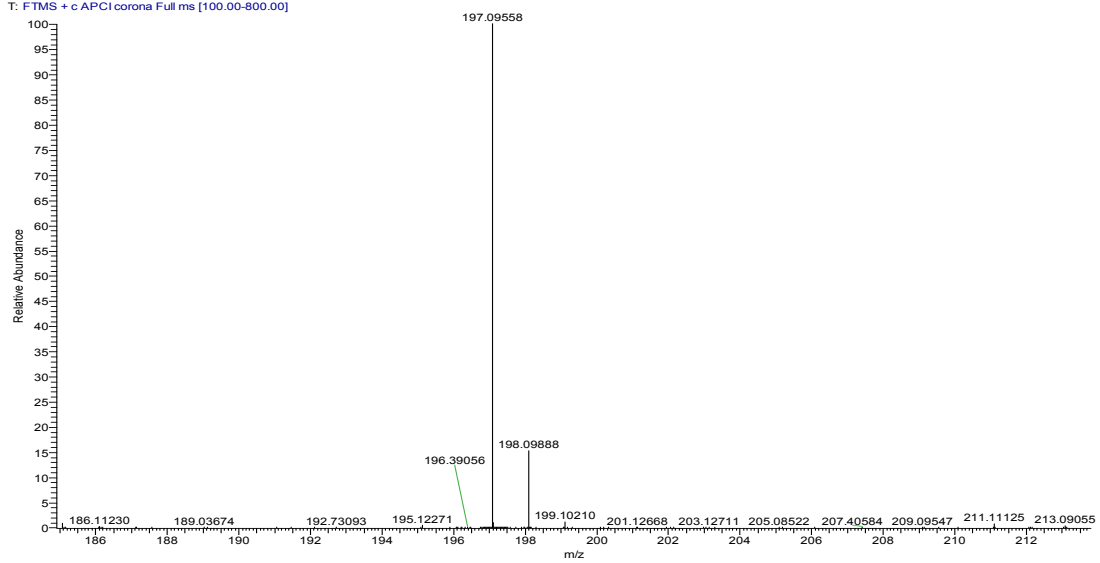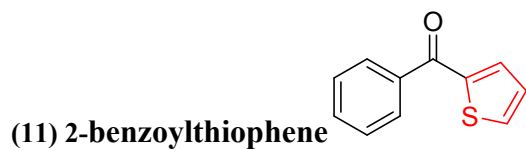

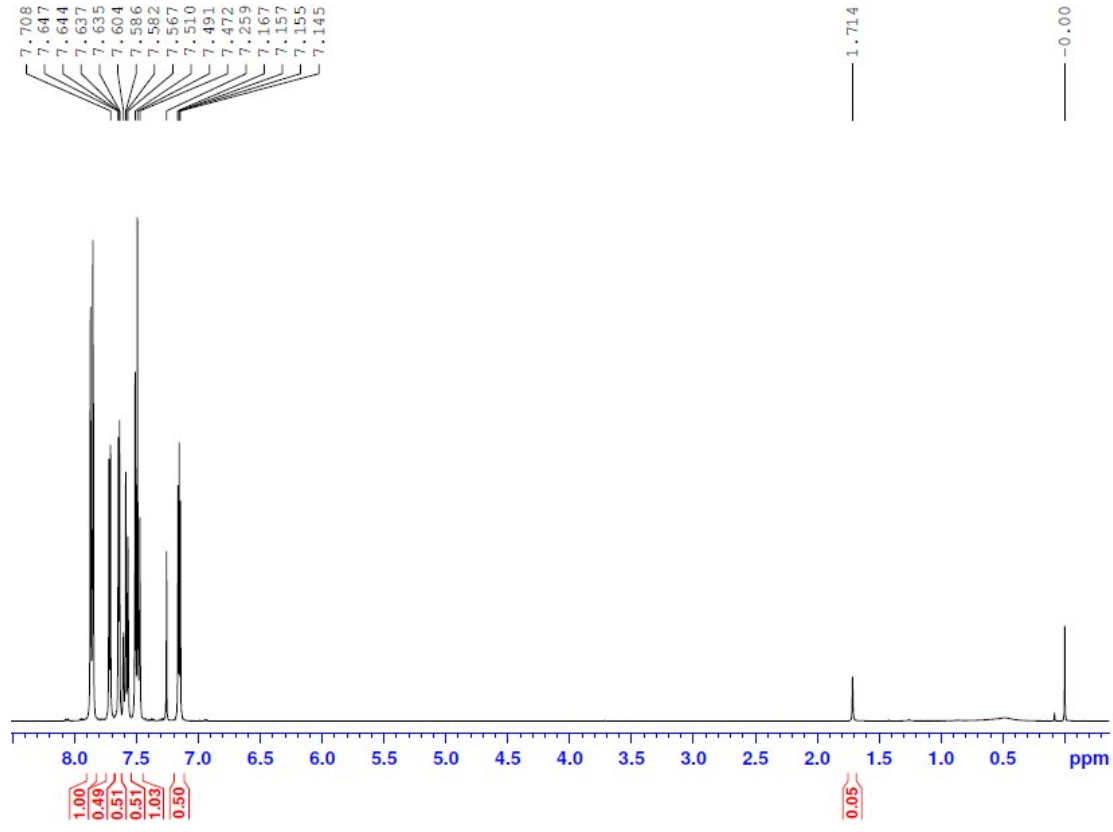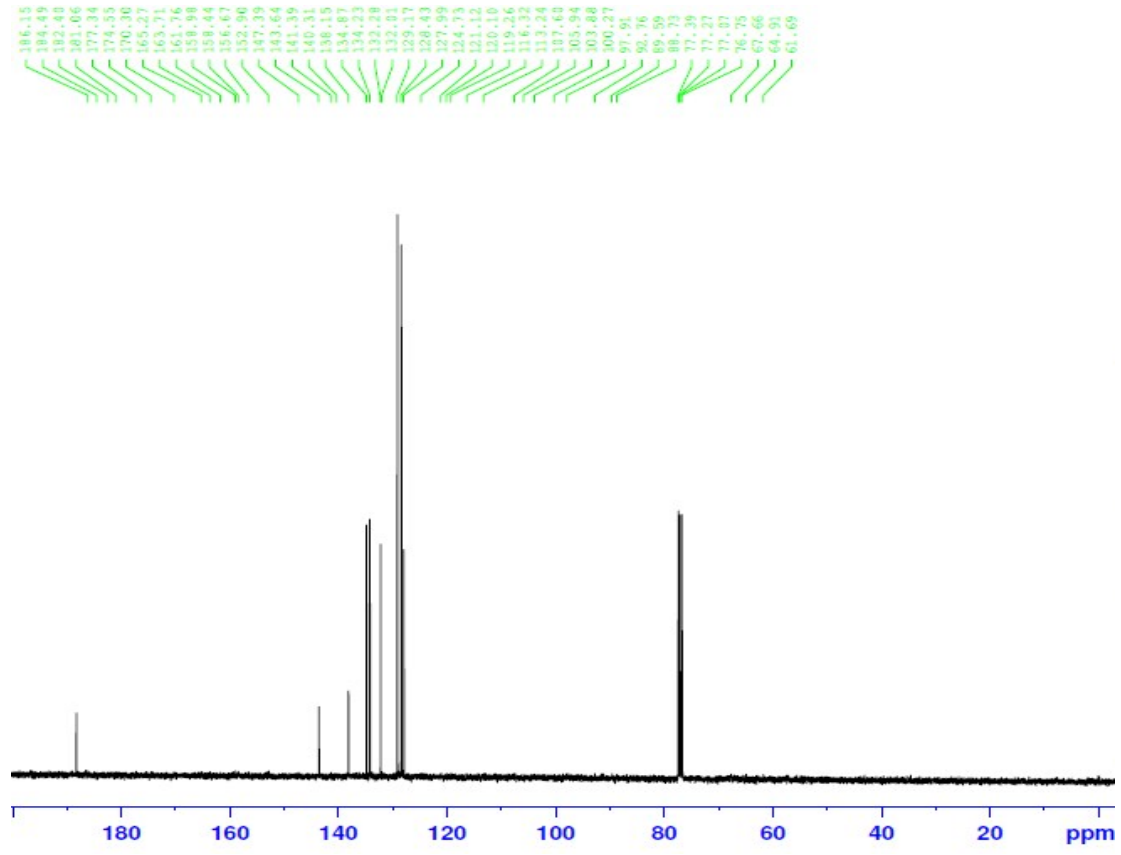

20150715\_APCI+3K #20 RT: 0.28 AV: 1 NL: 8.41E7  
T: FTMS + c APCI corona Full ms [100.00-800.00]

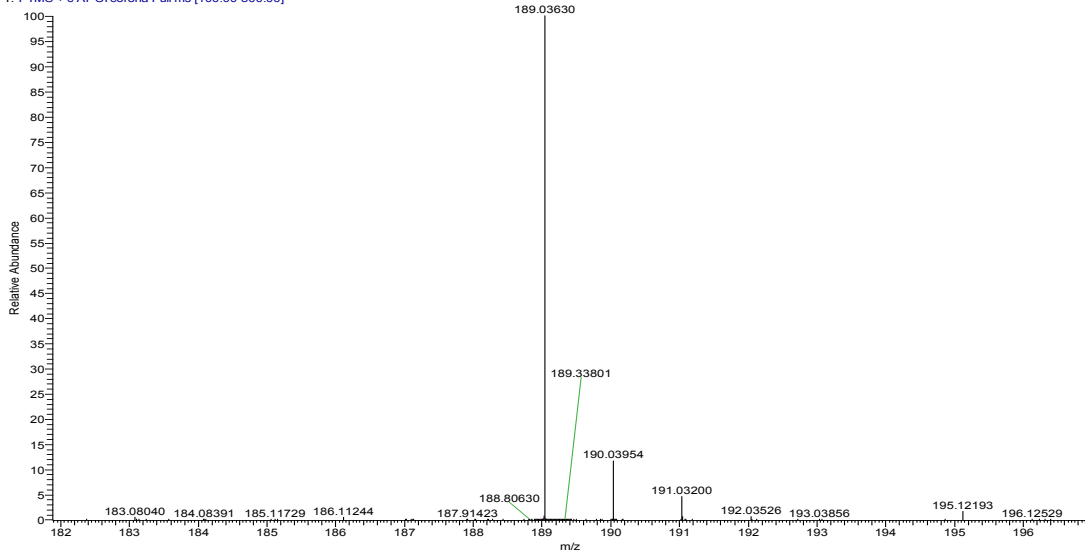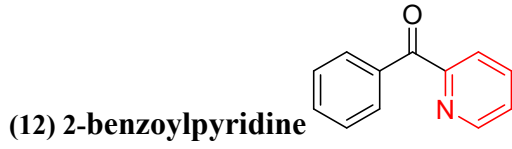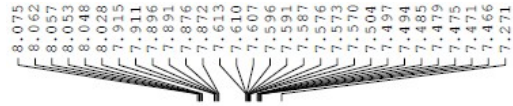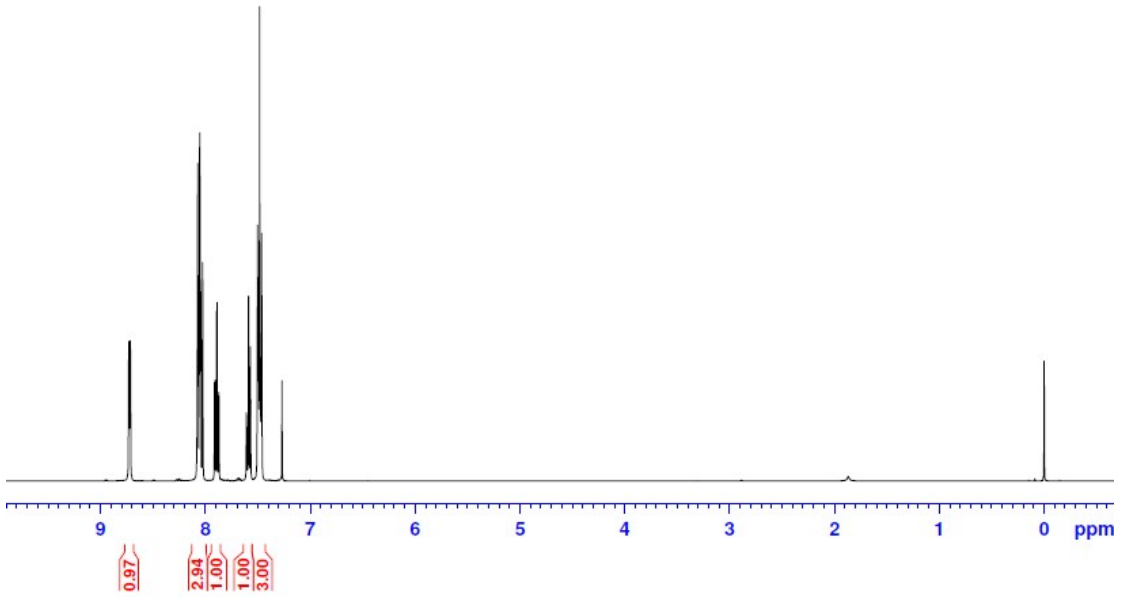

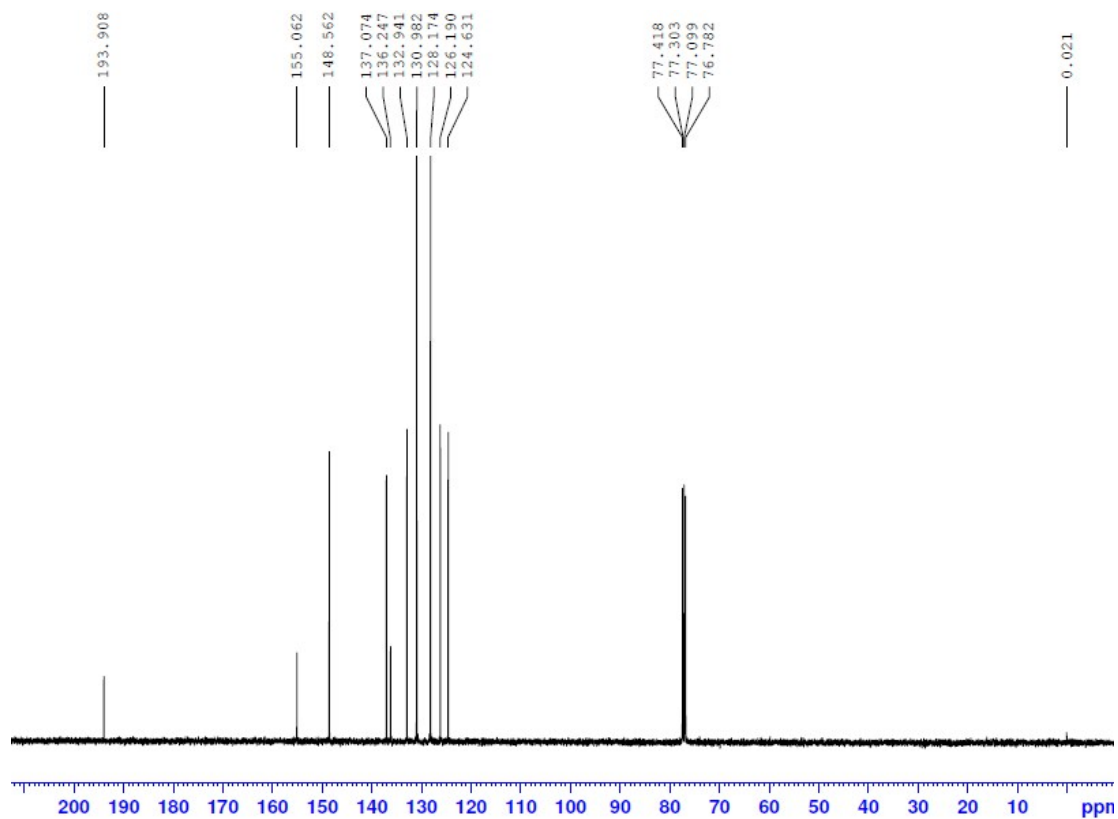

20150708\_ApCH4N#12 RT: 0.15 AV: 1 NL: 3.15E8  
T: FTMS + c ESI Full ms [100.00-800.00]

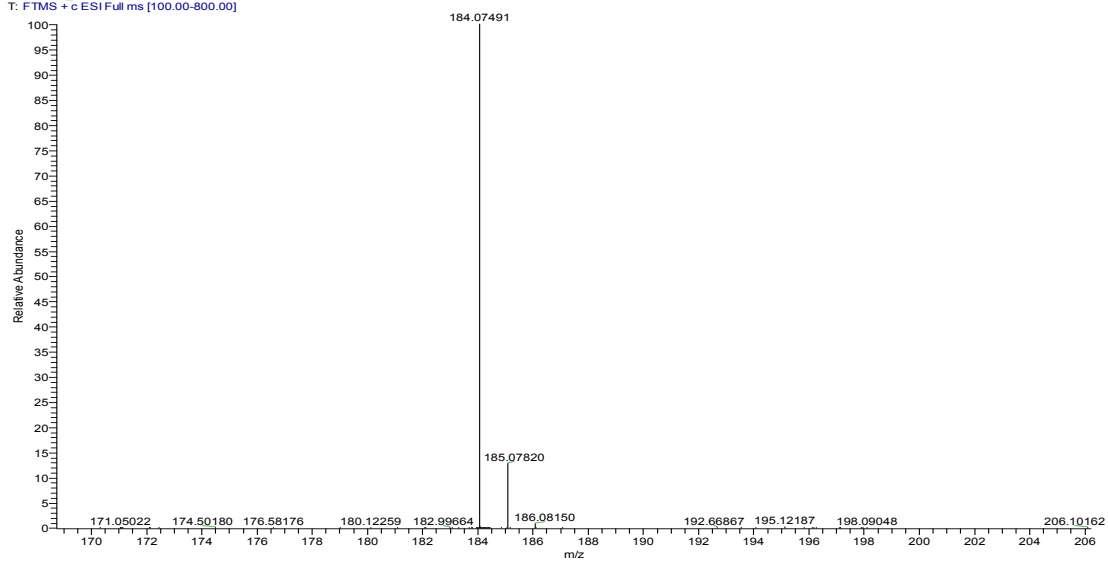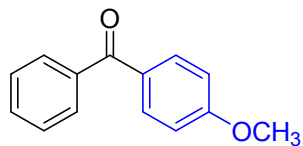

(13) 4-methoxy-benzophenone

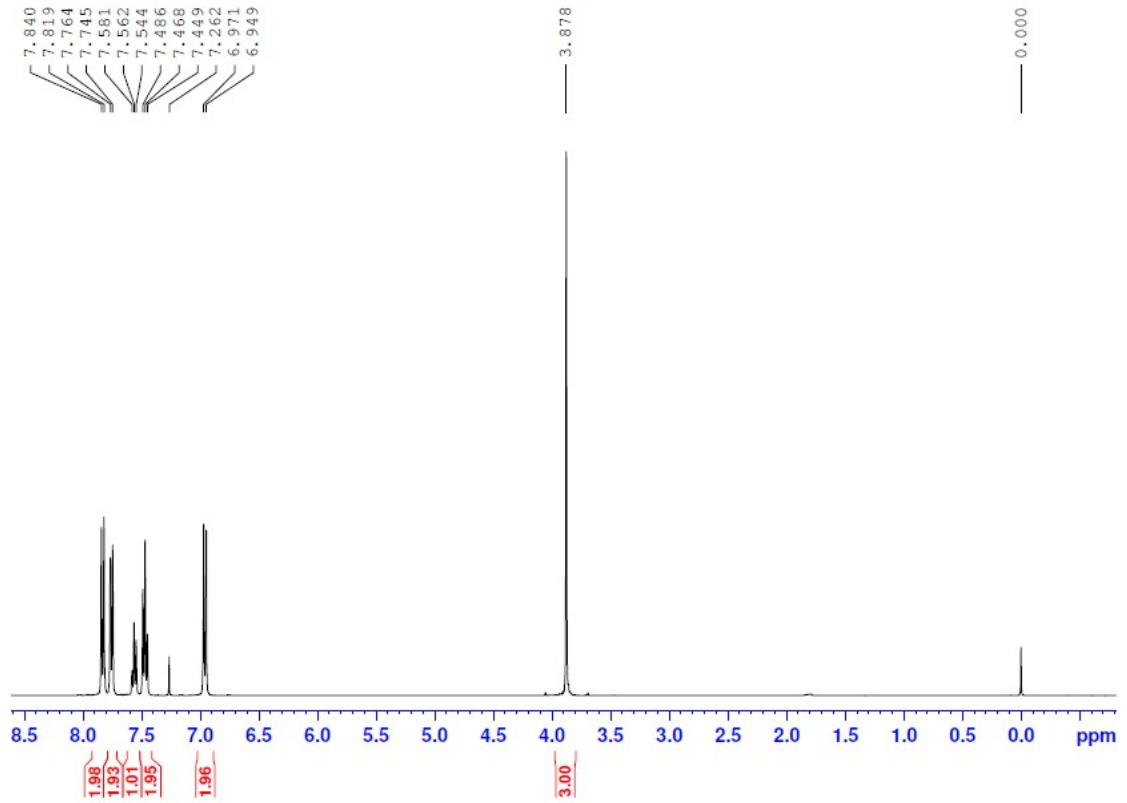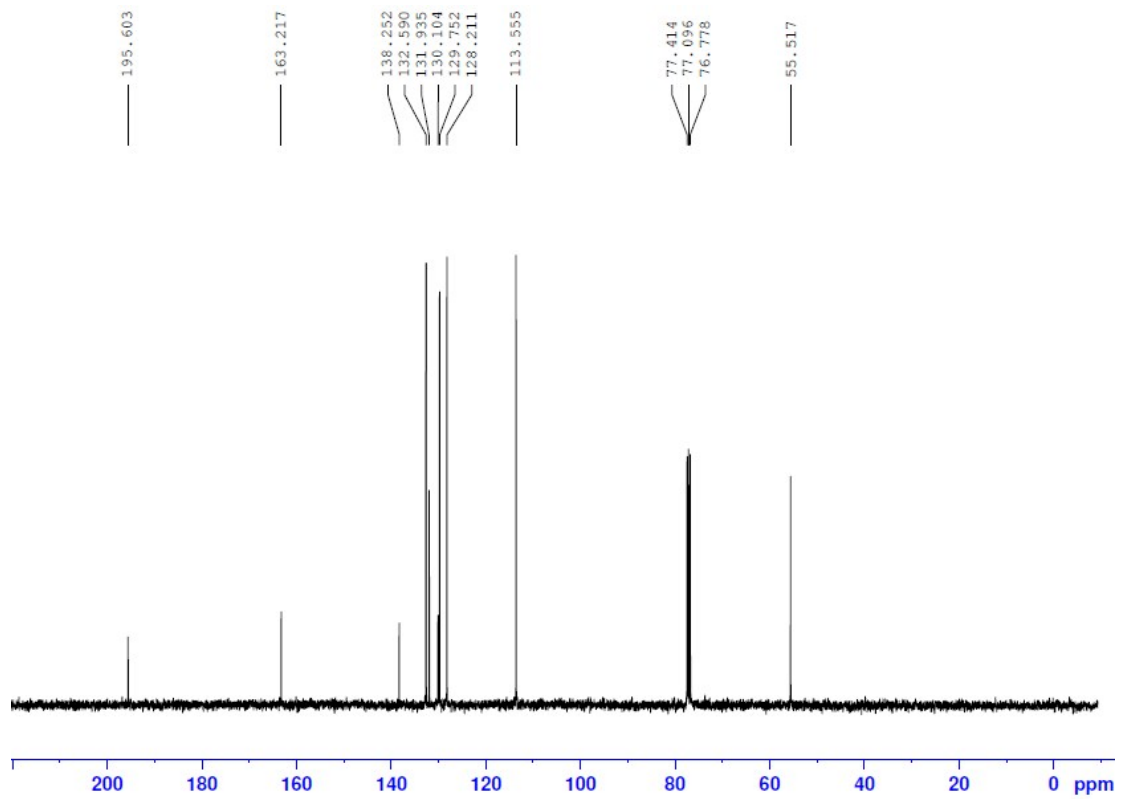

20150715\_APC4B #9 RT: 0.11 AV: 1 NL: 4.40E8  
T: FTMS + c APC1 corona Full ms [100.00-800.00]

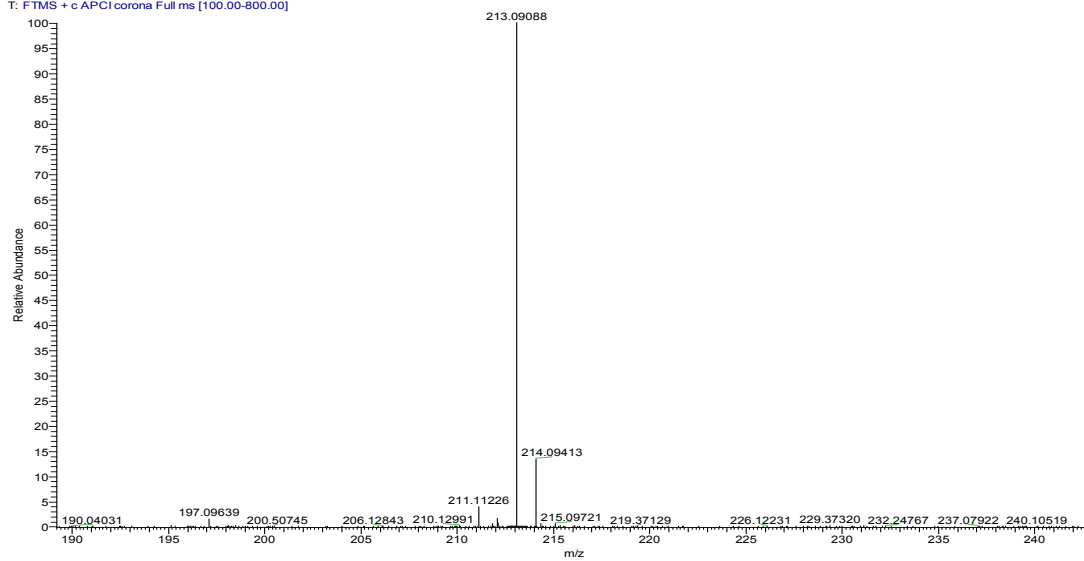

(14) 4-bromo-benzophenone

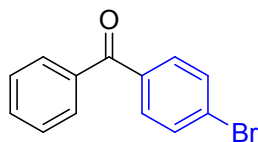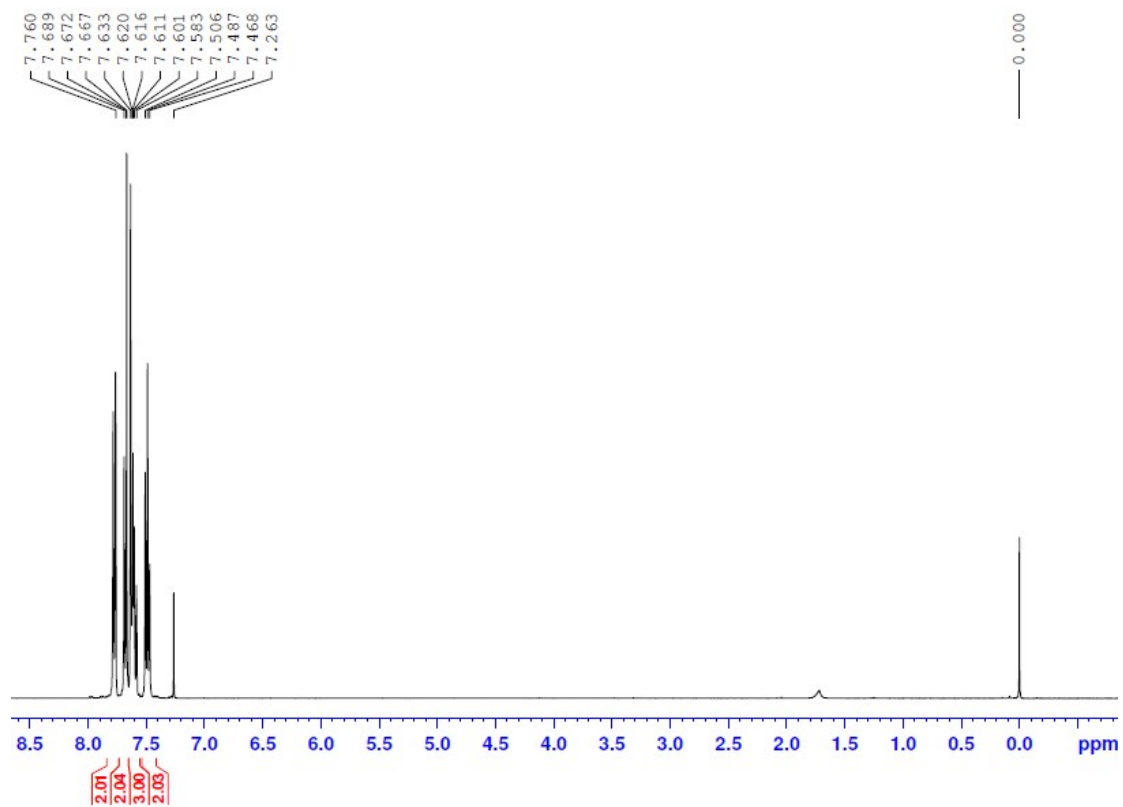

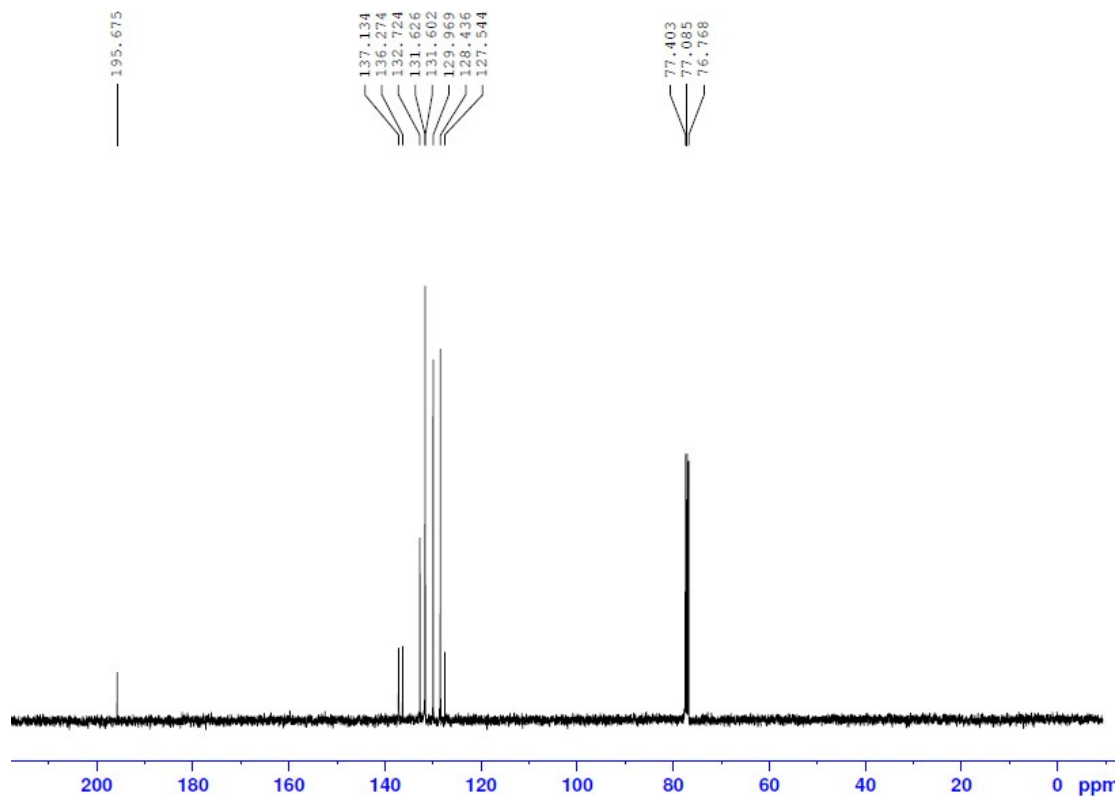

20150715\_APC4D #23 RT: 0.32 AV: 1 NL: 4.23E6  
 T: FTMS + c APC1 corona Full ms [100.00-800.00]

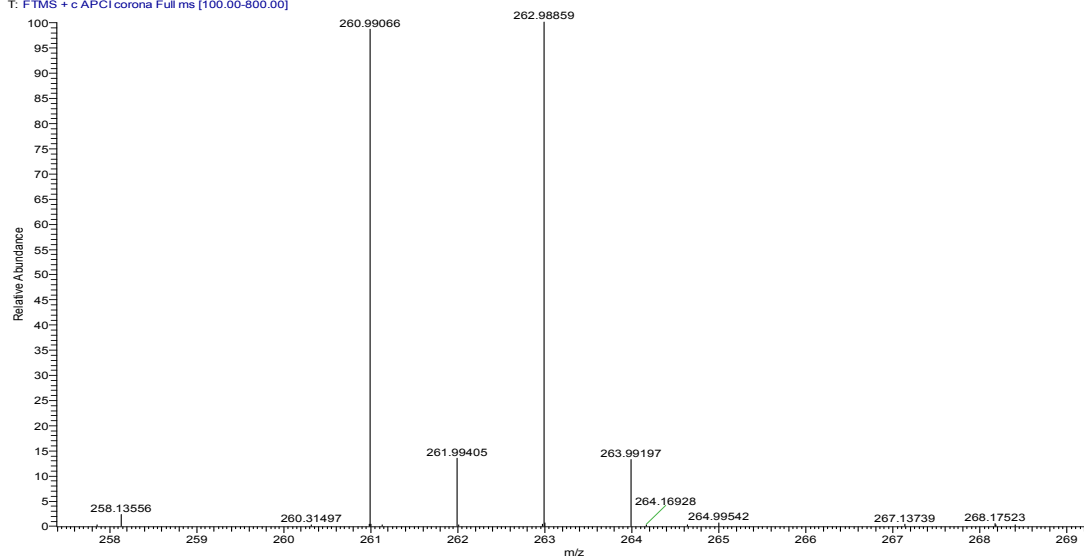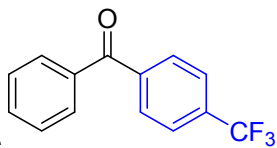

(15) 4-trifluoromethyl-benzophenone



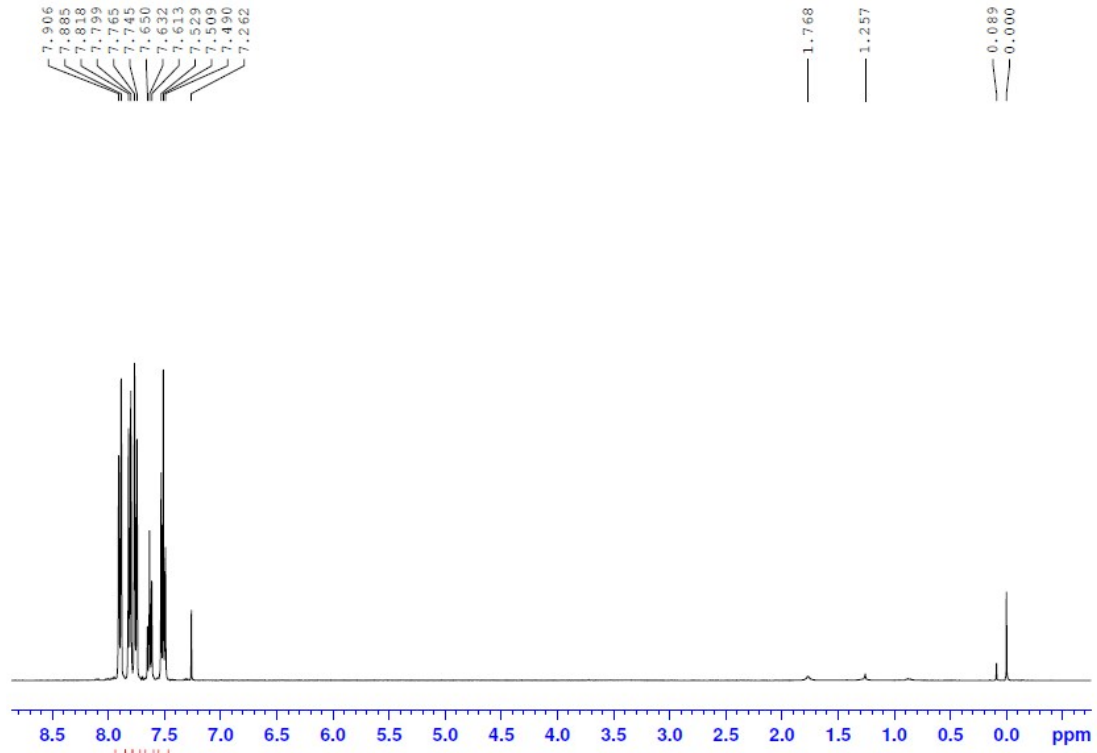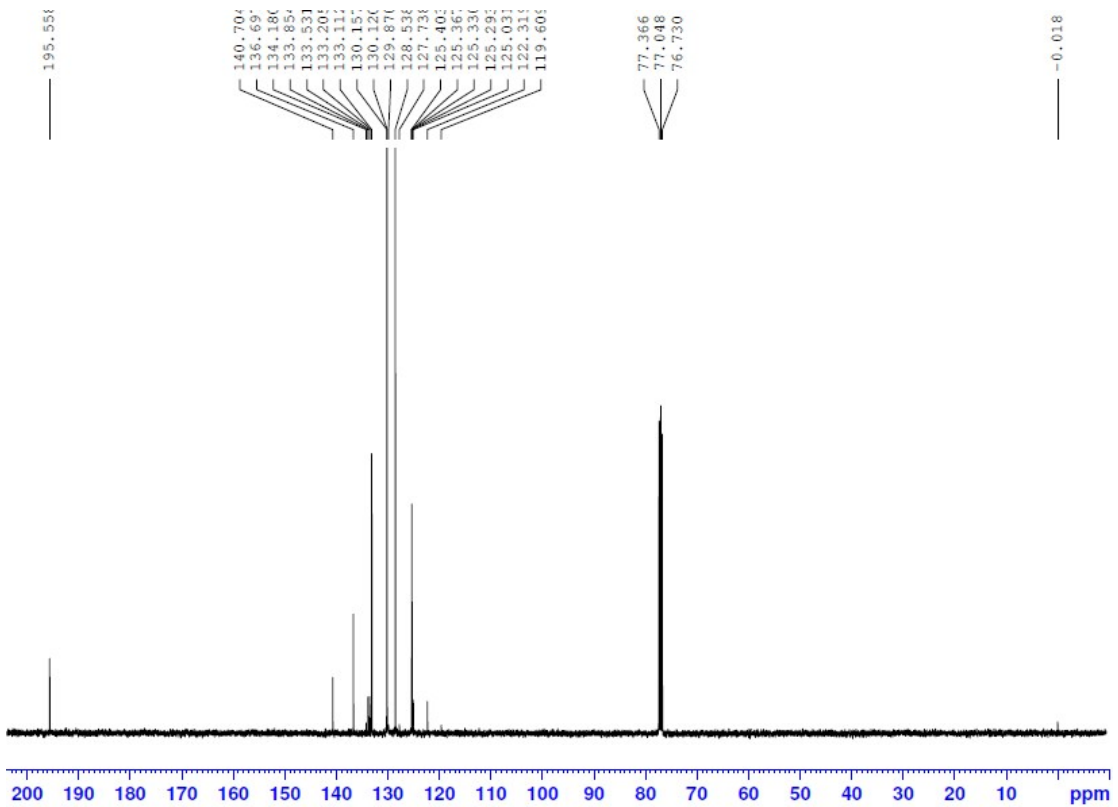

20150715\_APC4E #29 RT: 0.42 AV: 1 NL: 2.36E5  
T: FTMS + c APC1 corona Full ms [100.00-800.00]

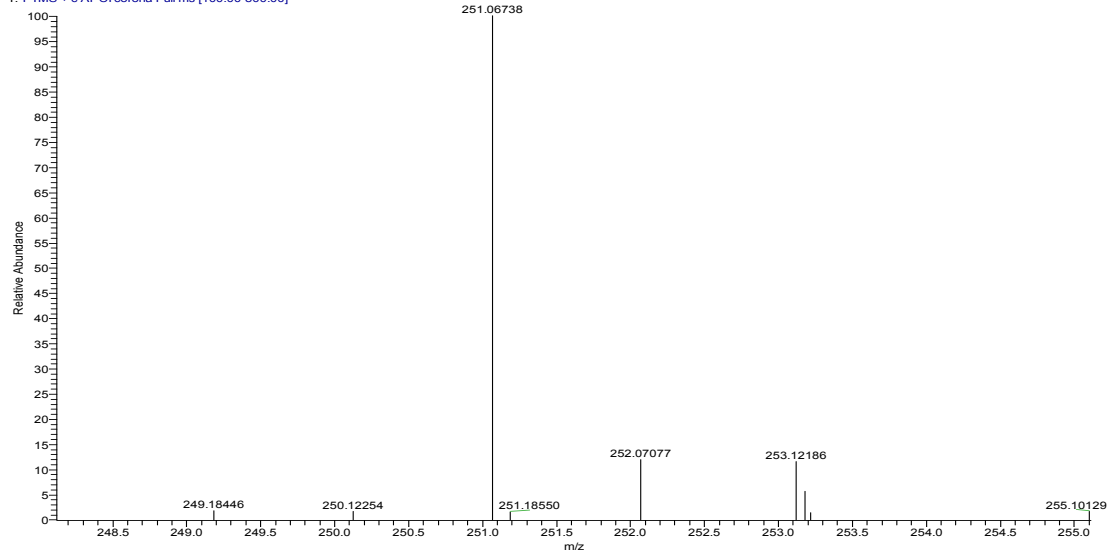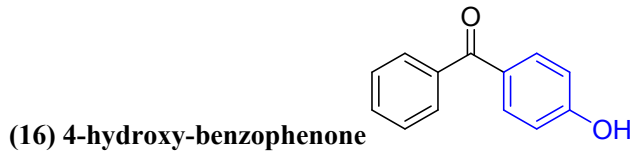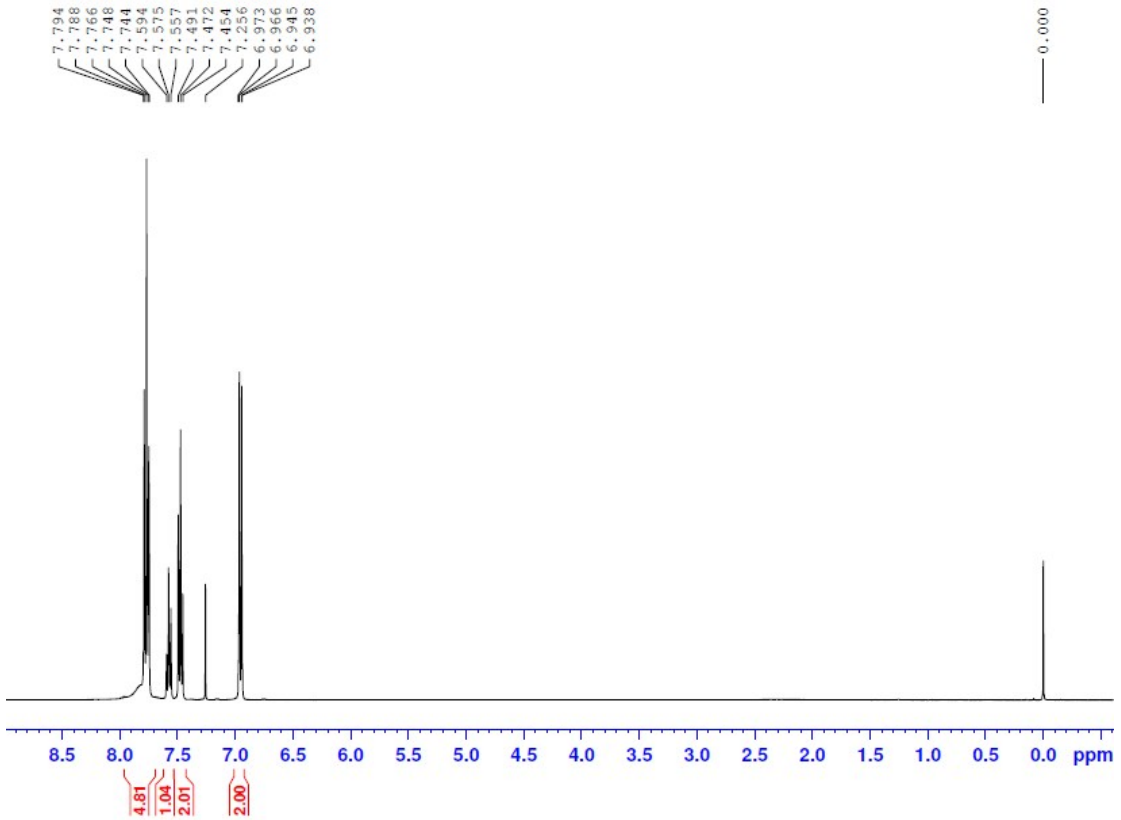

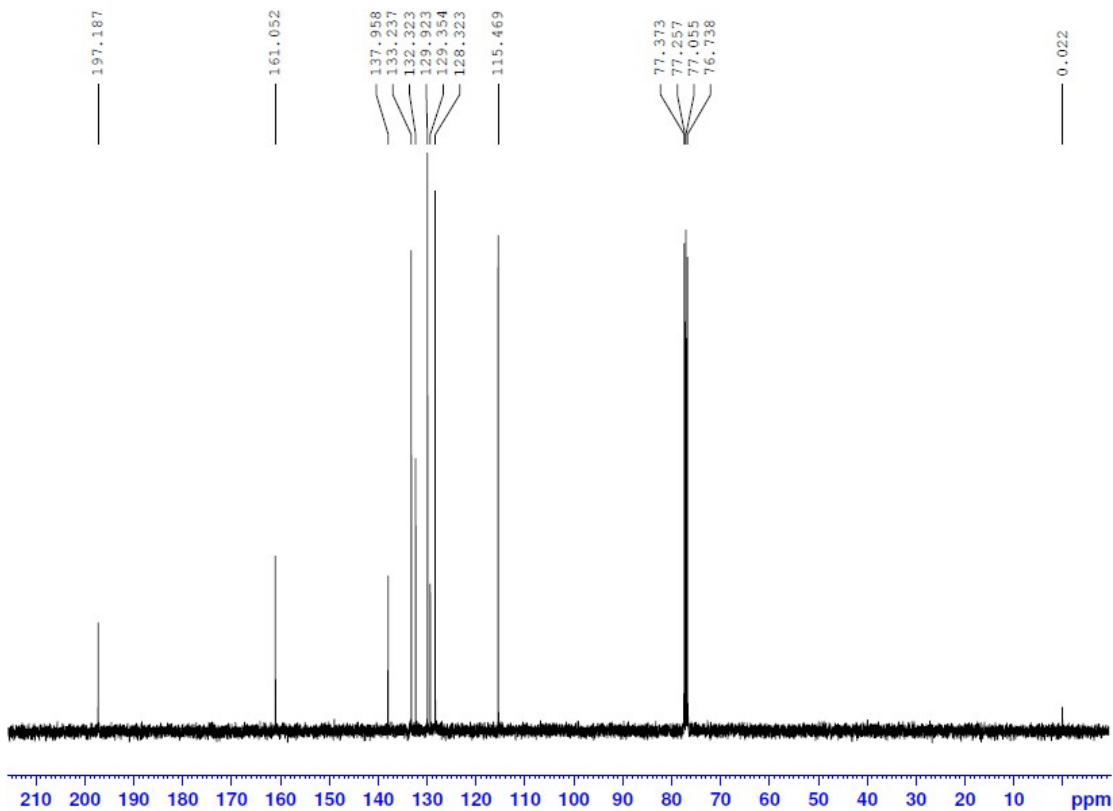

20150715\_ApCH4F #10 RT: 0.14 AV: 1 NL: 2.34E8  
 T: FTMS + c APC1 corona Full ms [100.00-800.00]

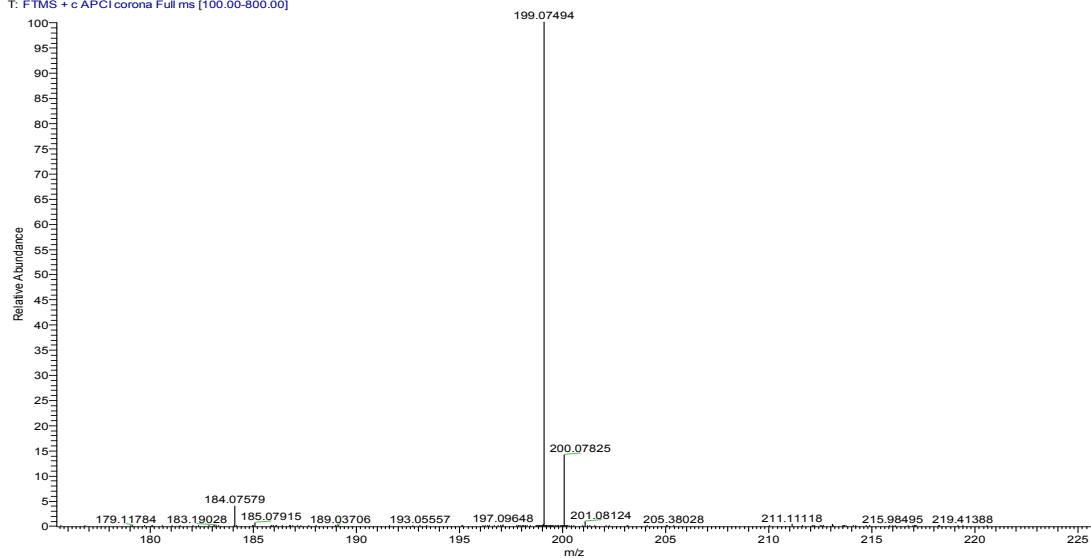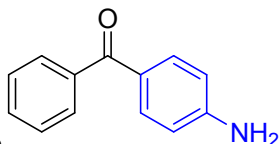

(17) 4-aminobenzophenone

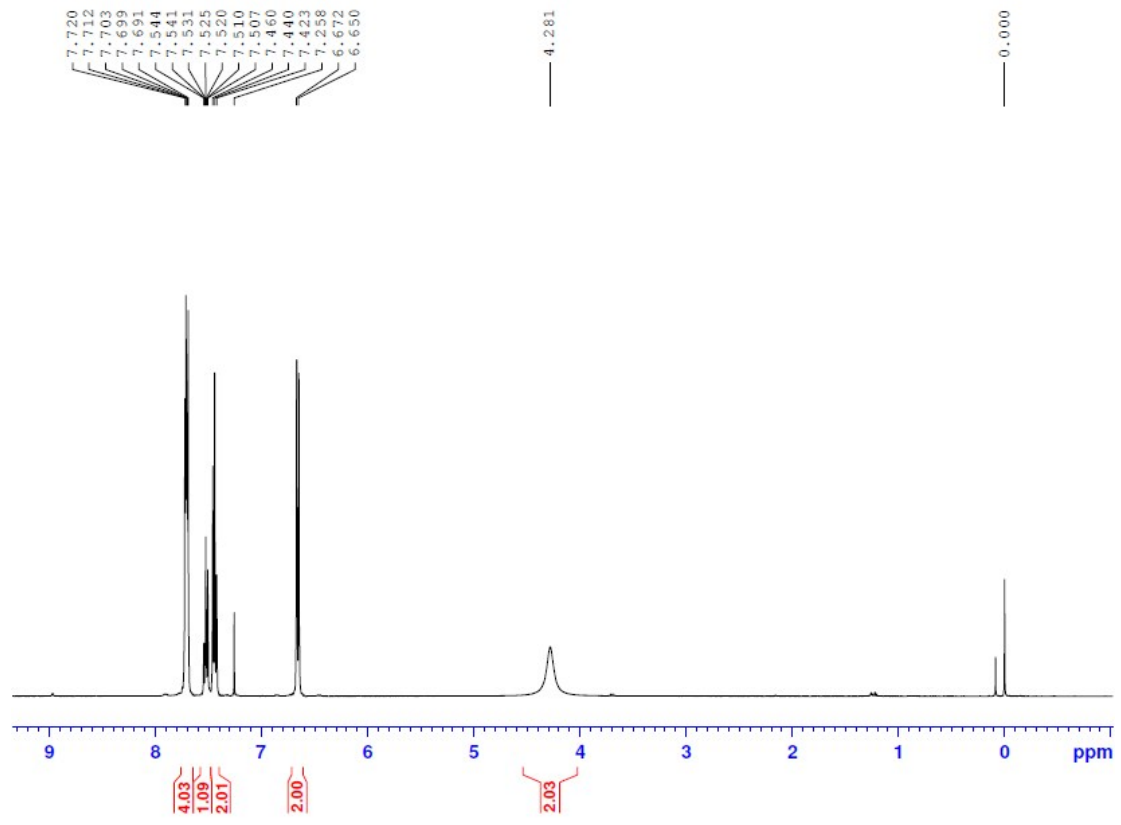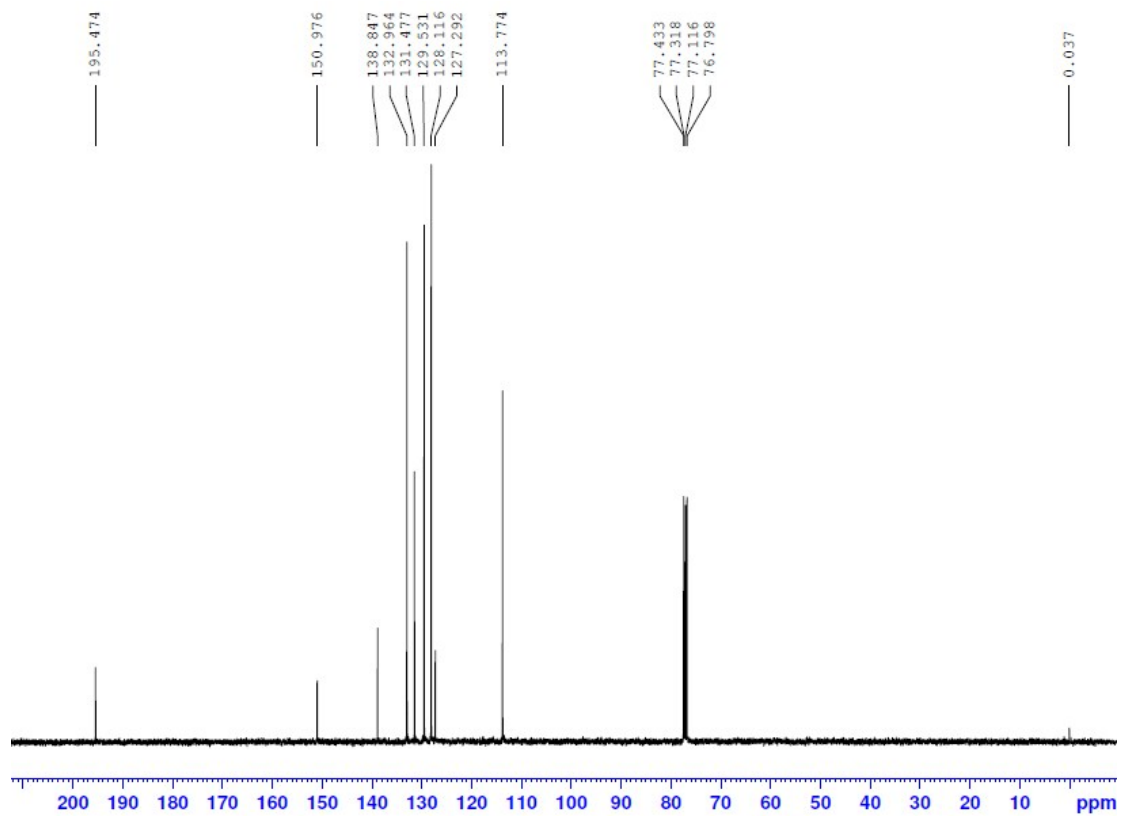

20150715\_APC4G#8 RT: 0.11 AV: 1 NL: 5.93E7  
T: FTMS + c APC1 corona Full ms [100.00-800.00]

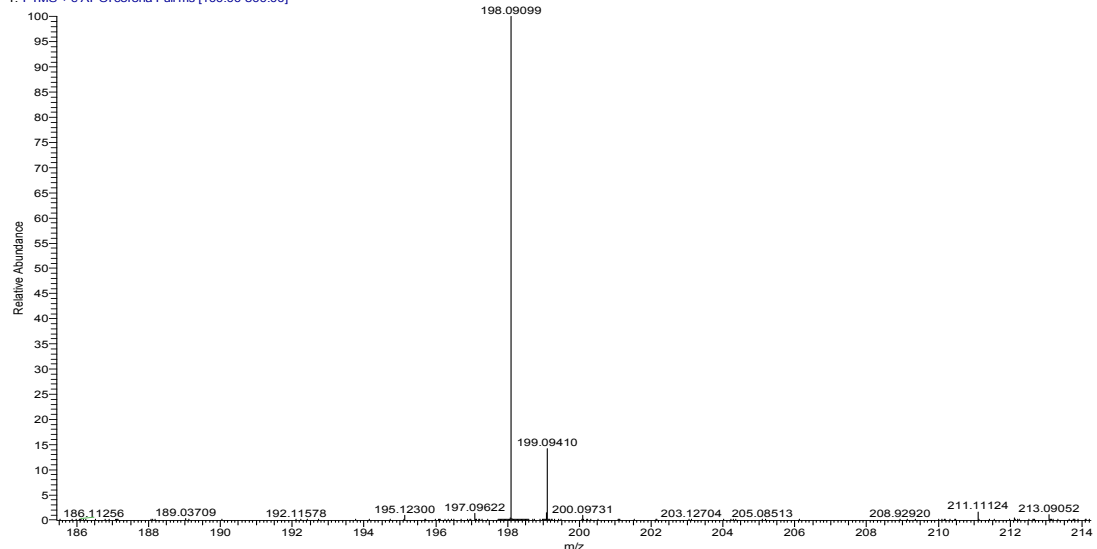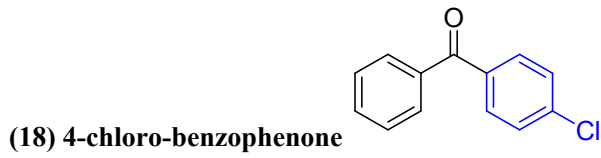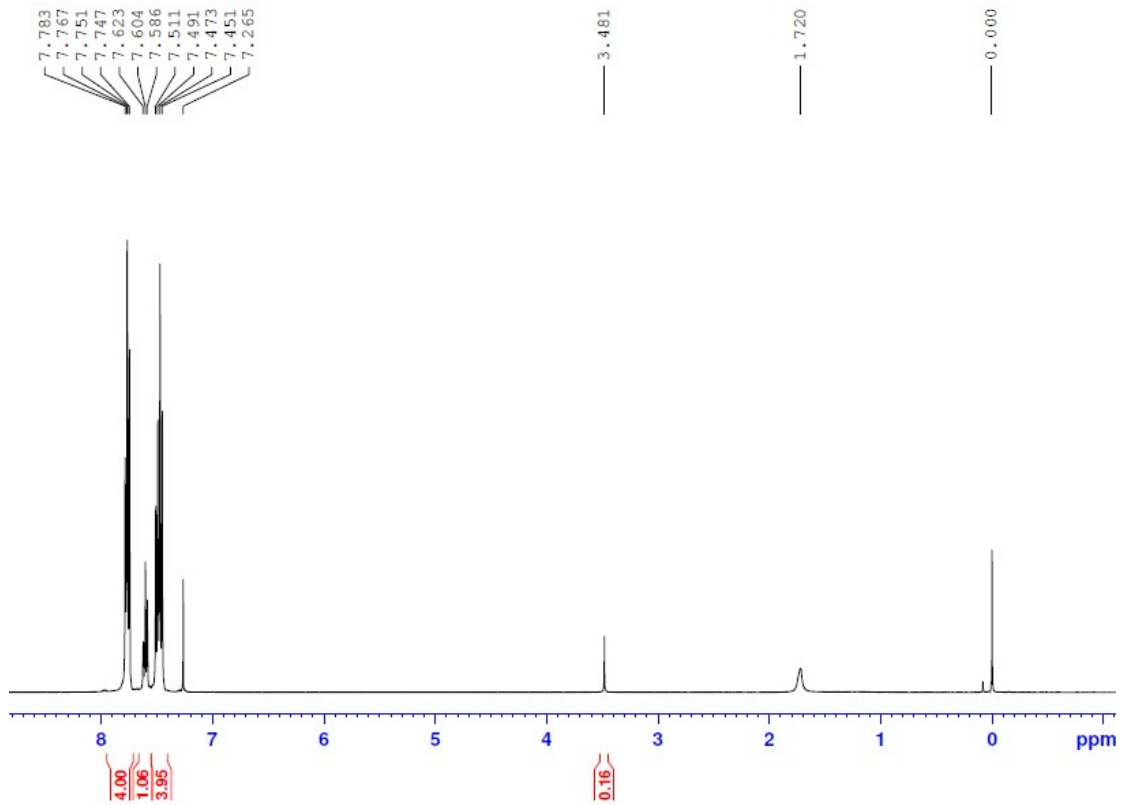

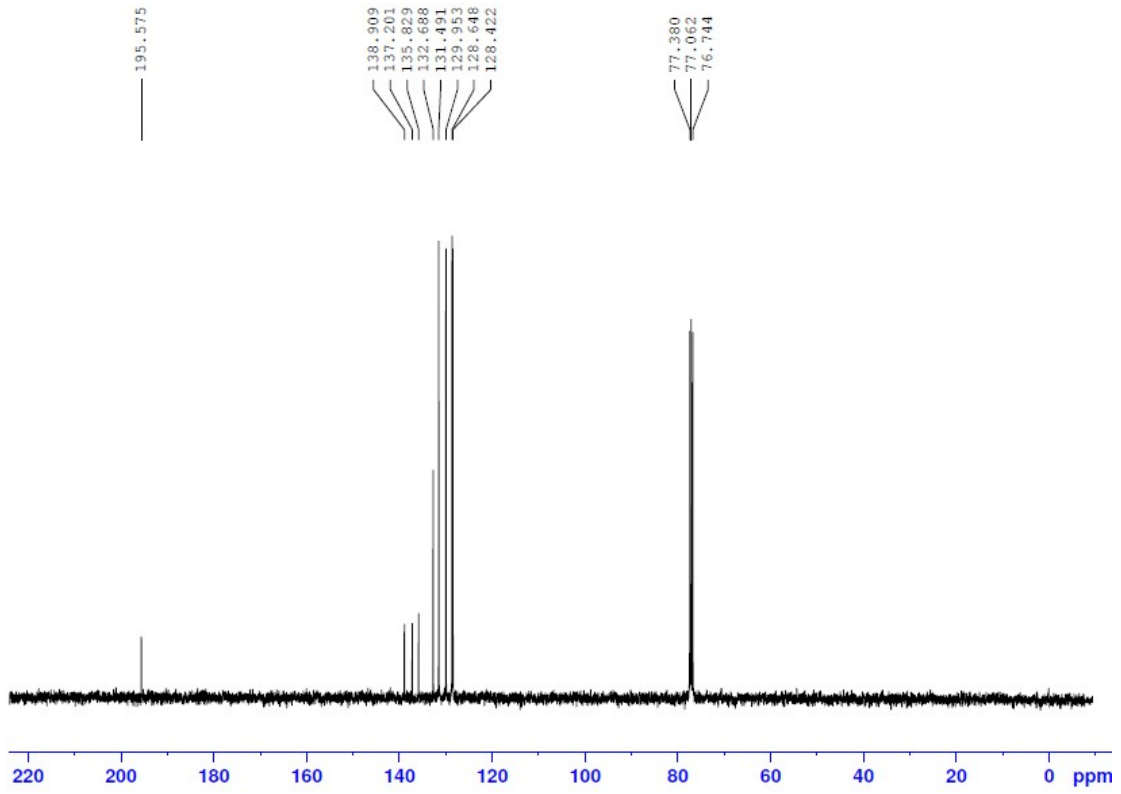

20150715\_APCI+4J #9 RT: 0.13 AV: 1 NL: 1.19E8  
 T: FTMS + c.APCI.corona Full ms [100.00-800.00]

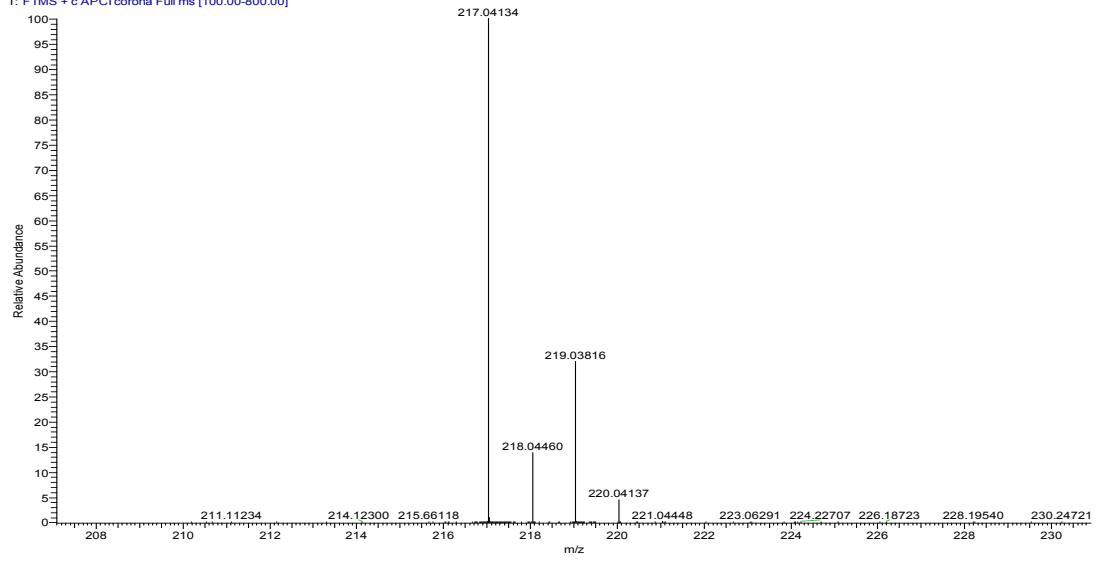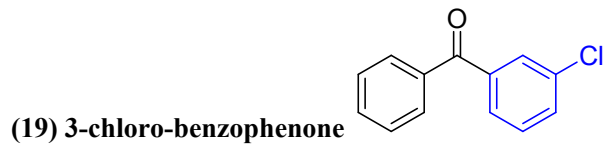

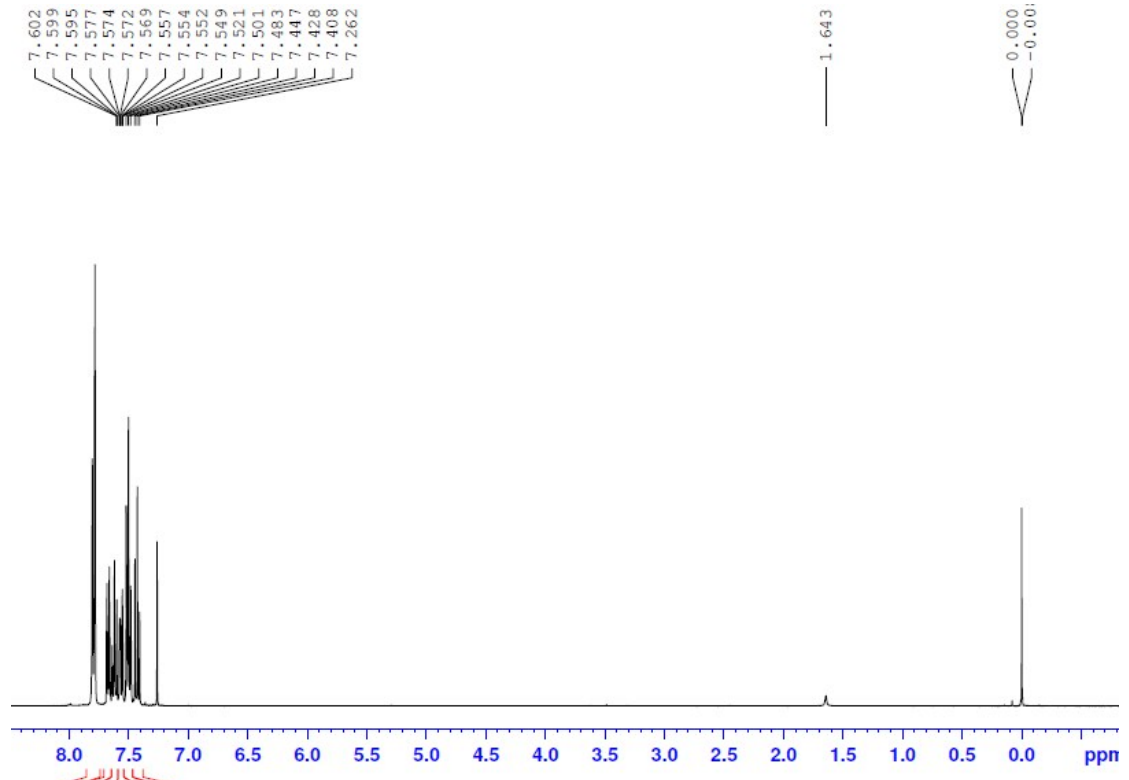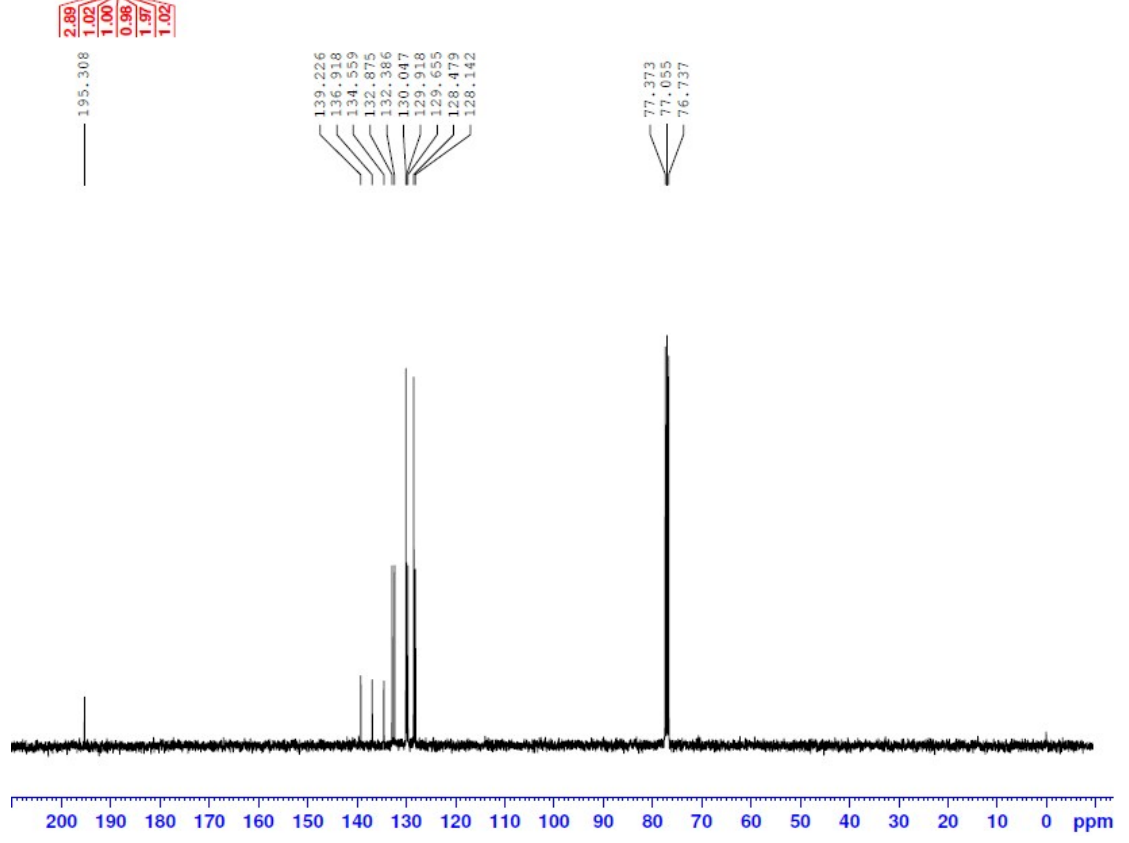

20150715\_APC4H#11 RT: 0.14 AV: 1 NL: 1.46E7  
T: FTMS + c APC1 corona Full ms [100.00-800.00]

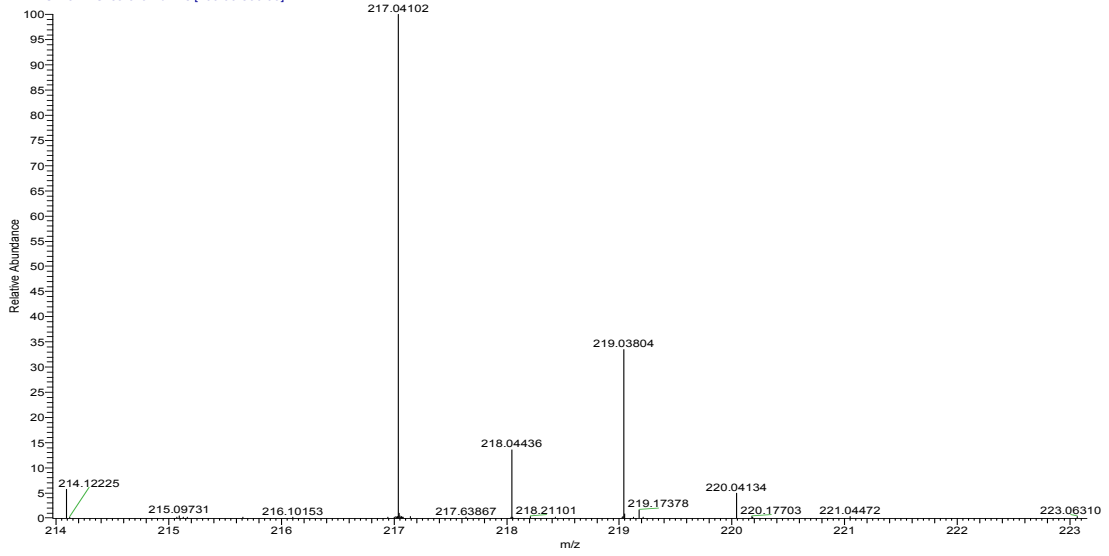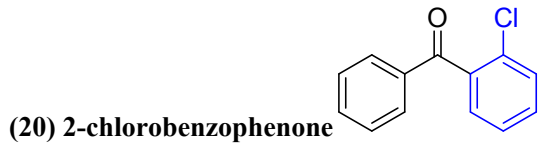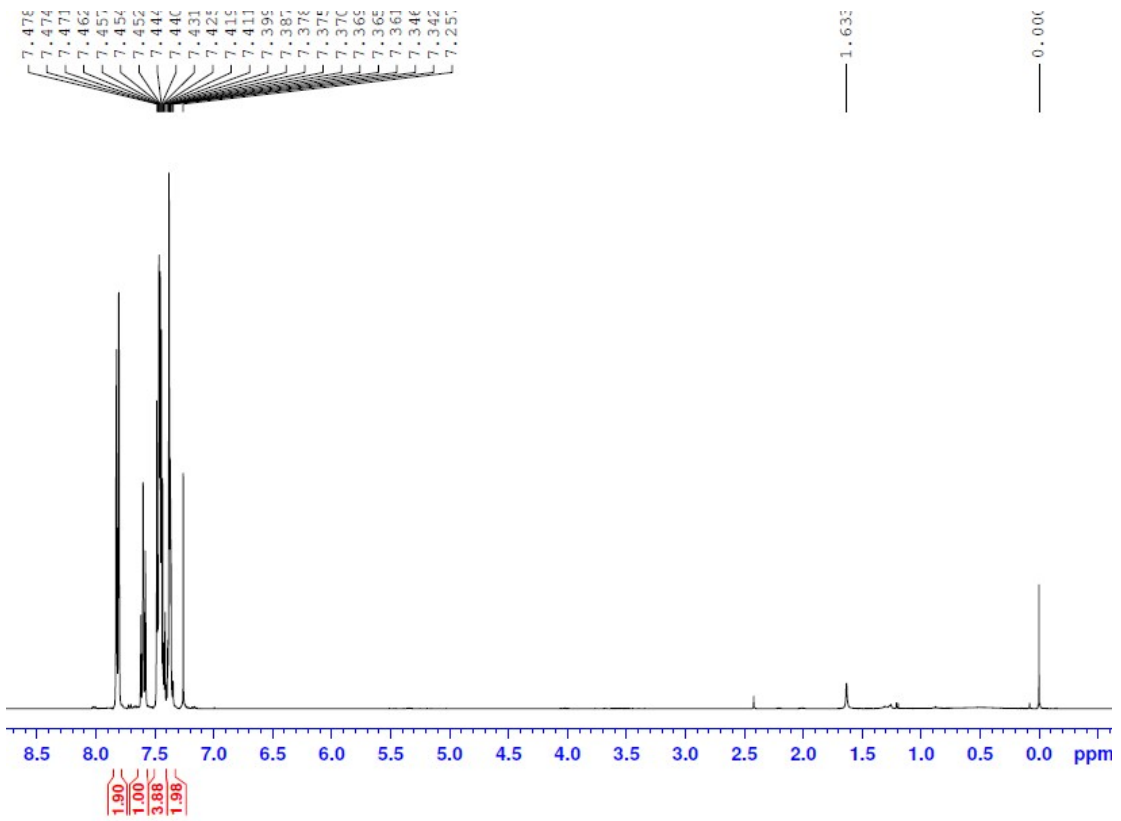



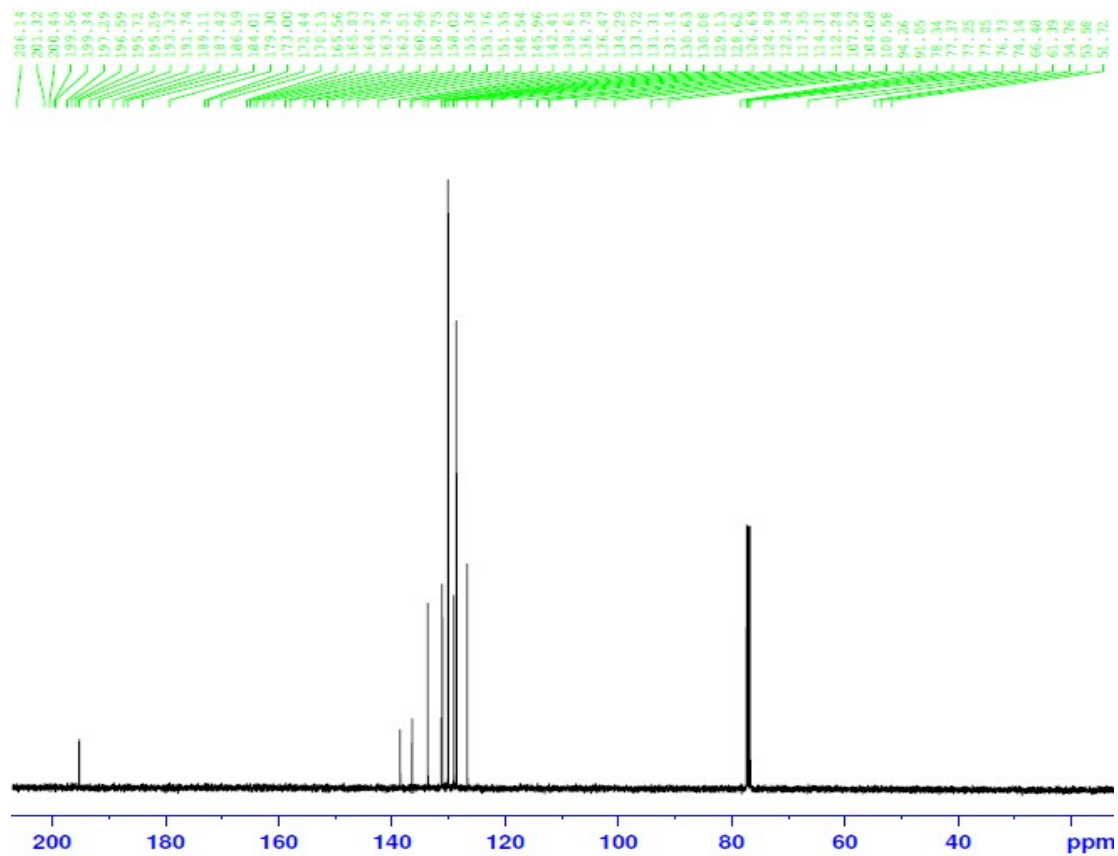

20150715\_APCI-HI#29 RT: 0.43 AV: 1 NL: 1.19E6  
T: FTMS + c APCI corona Full ms [100.00-800.00]

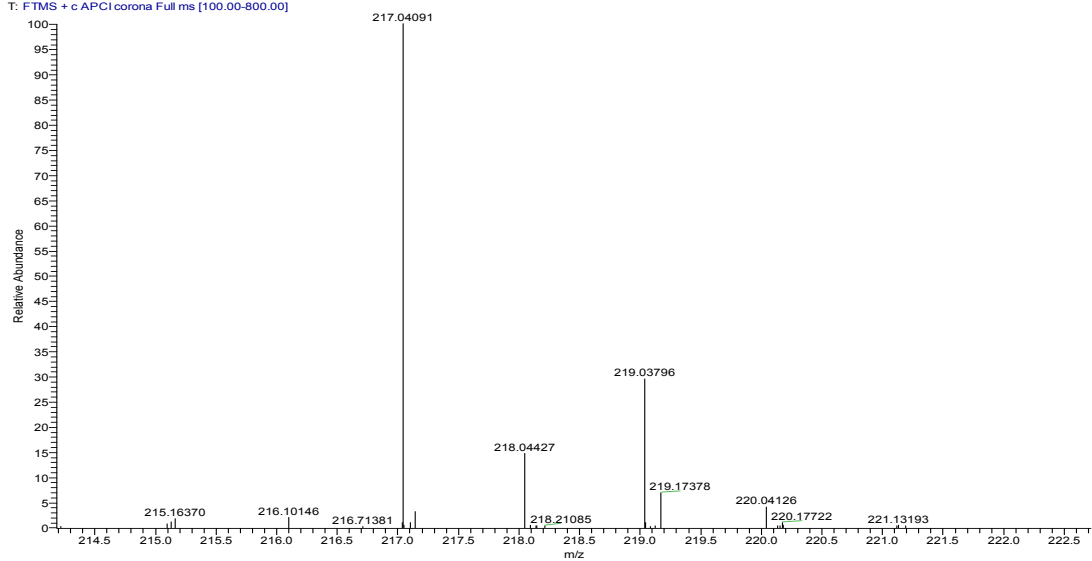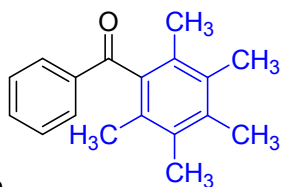

(21) 2,3,4,5,6-pentamethyl-benzophenone

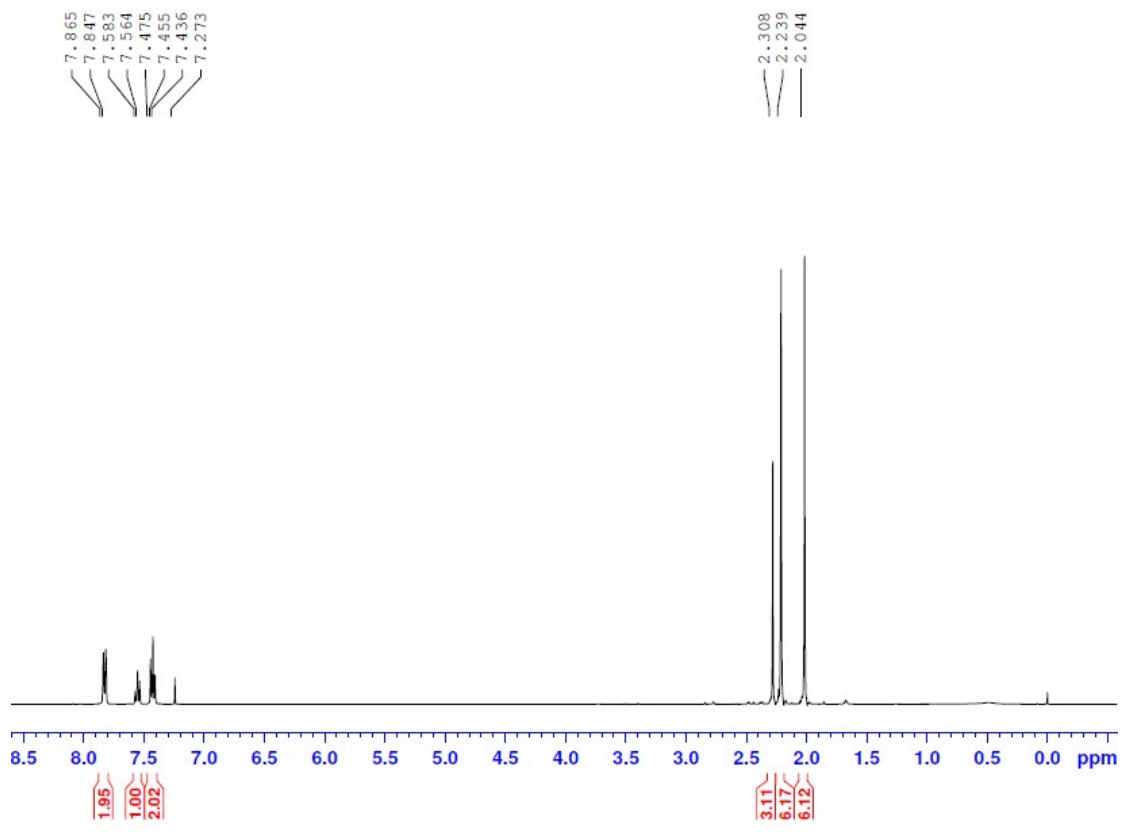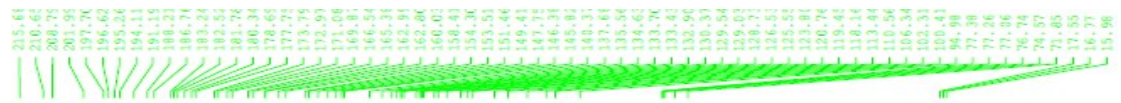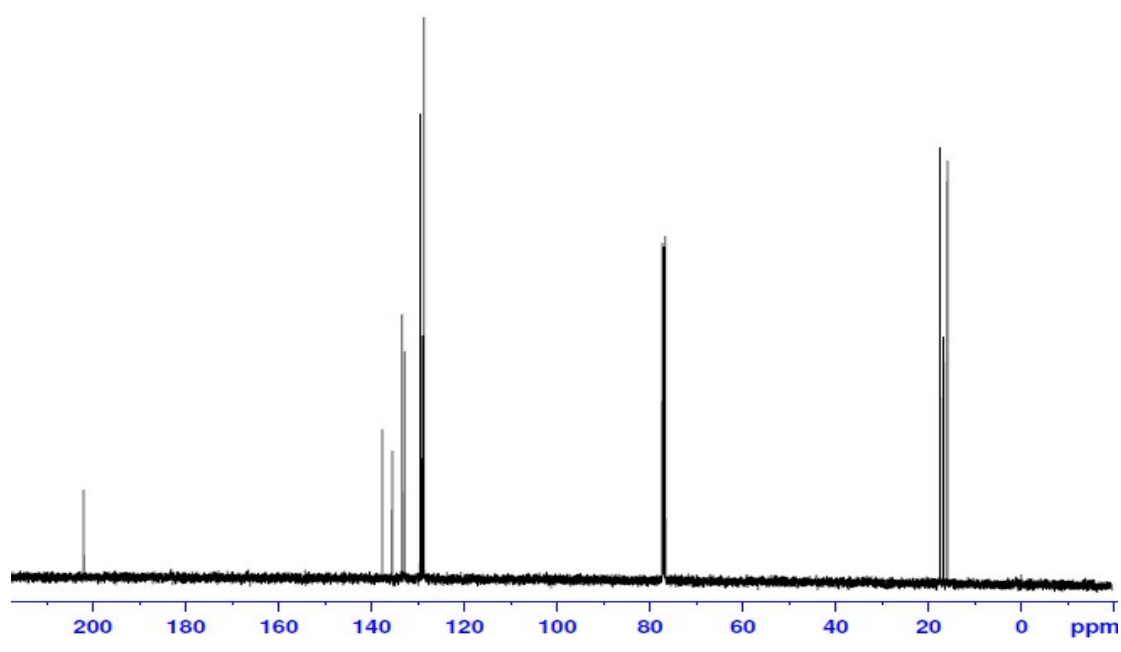

20150715\_APC4K #9 RT: 0.11 AV: 1 NL: 9.67E7  
T: FTMS + c APCI corona Full ms [100.00-800.00]

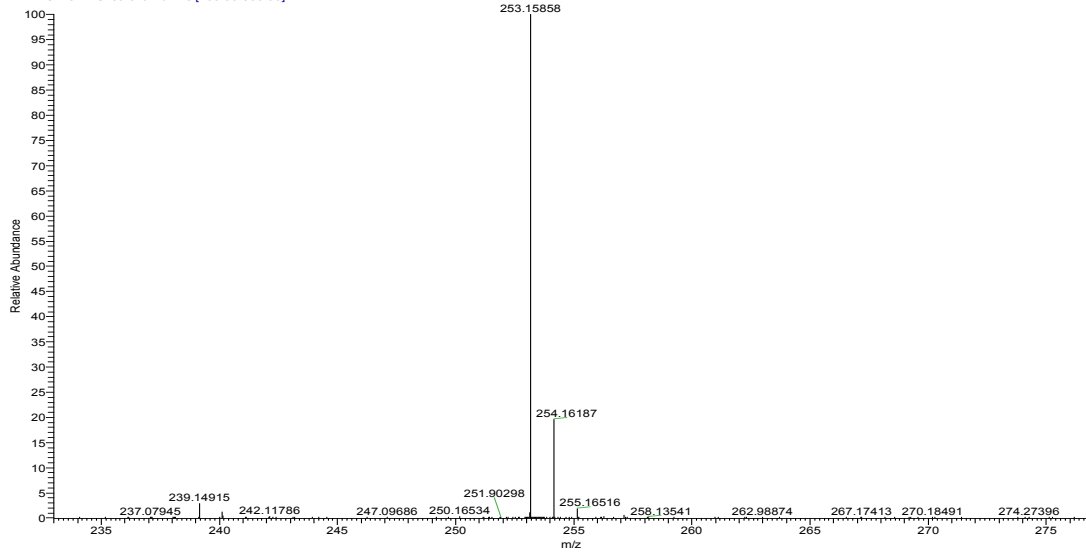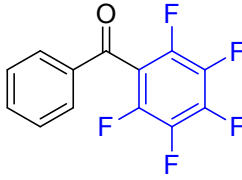

(22) 2,3,4,5,6-perfluorobenzophenone

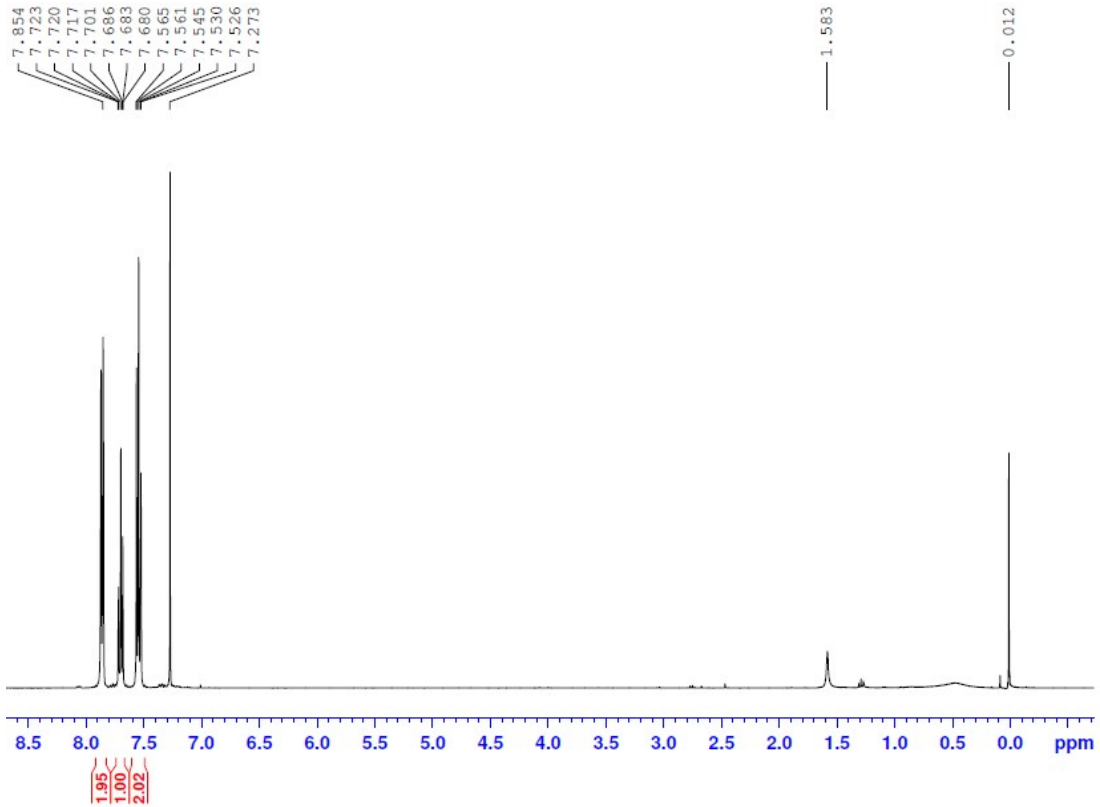

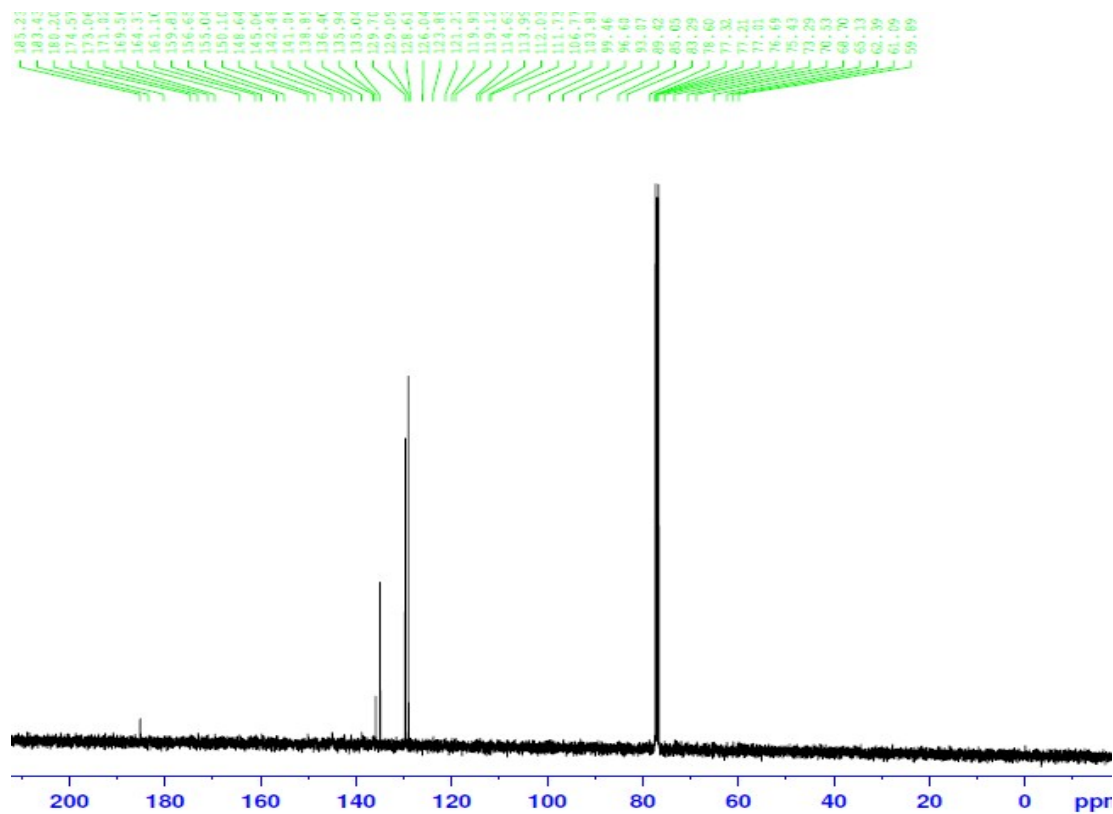

20150710\_ApCH-4L #12 RT: 0.15 AV: 1 NL: 1.10E7  
T: FTMS + c ESI Full ms [100.00-800.00]

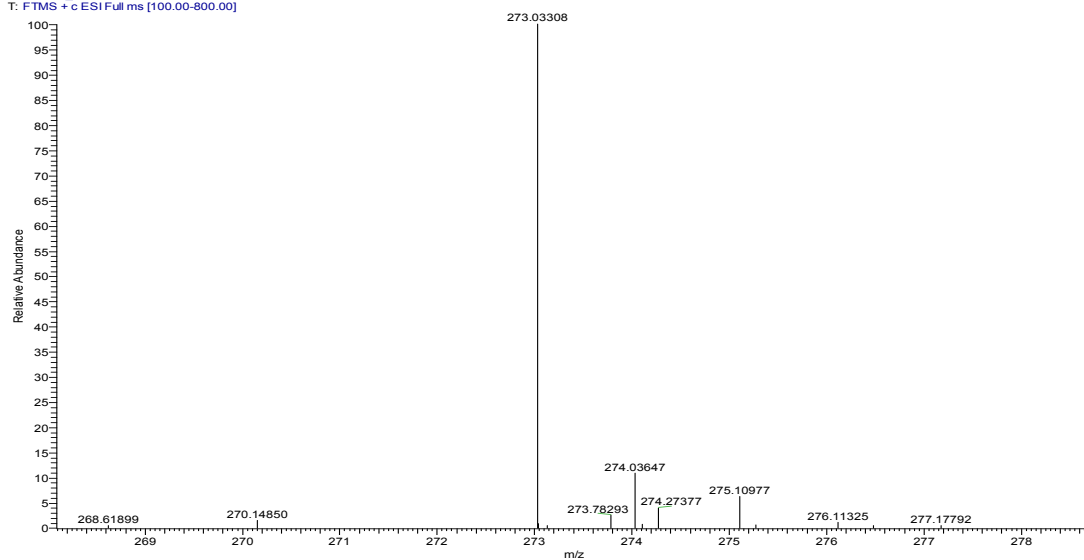

(23) 1-naphthyl-benzophenone

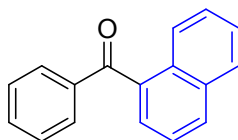

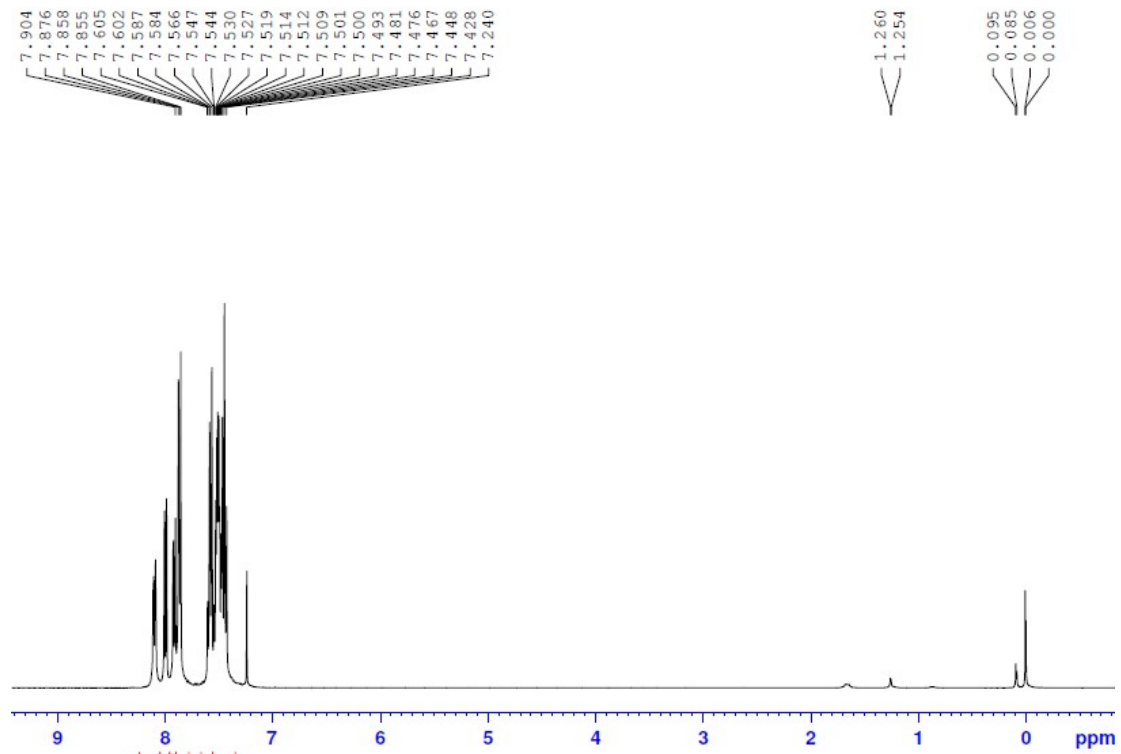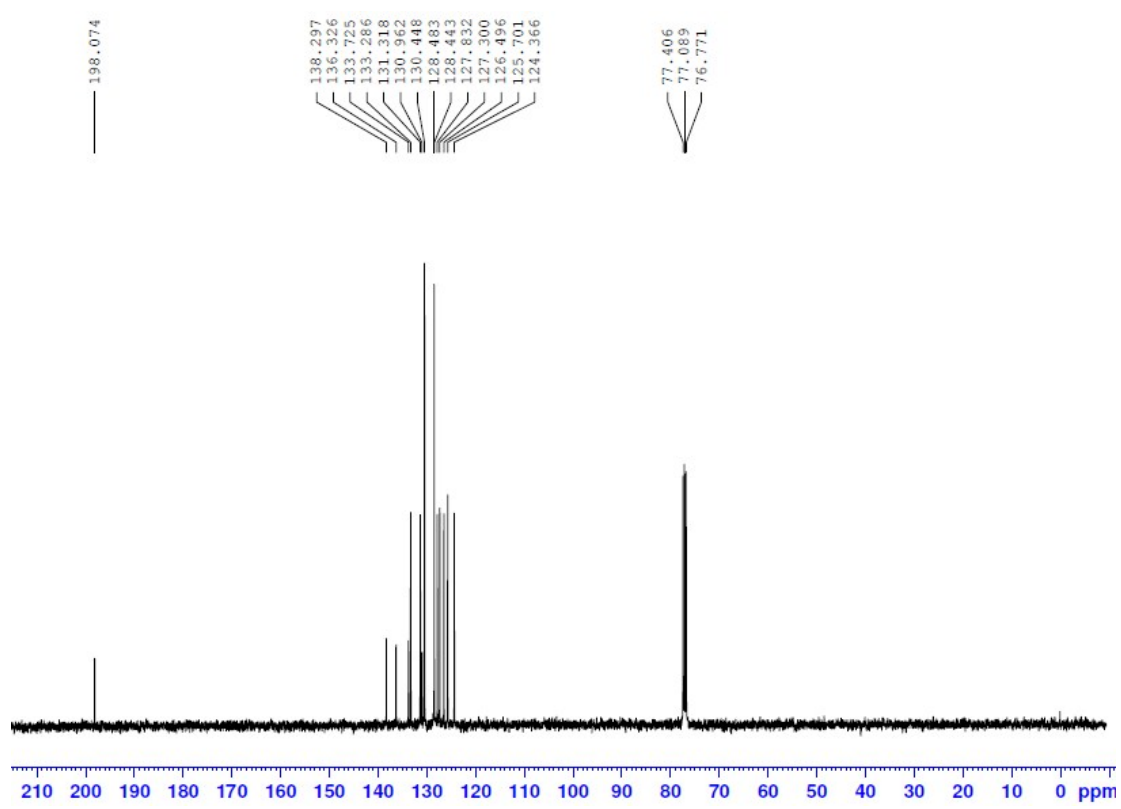

20150715\_APC4M#8 RT: 0.10 AV: 1 NL: 7.86E7  
T: FTMS + c APCI corona Full ms [100.00-800.00]

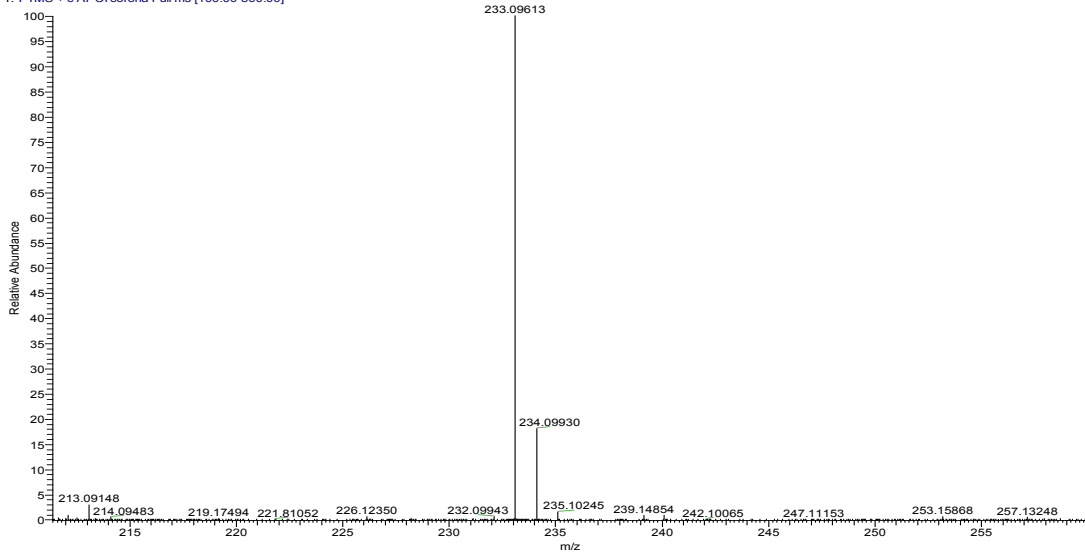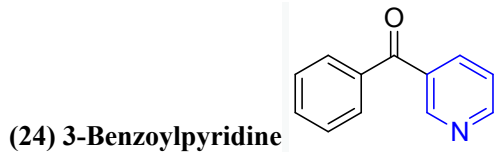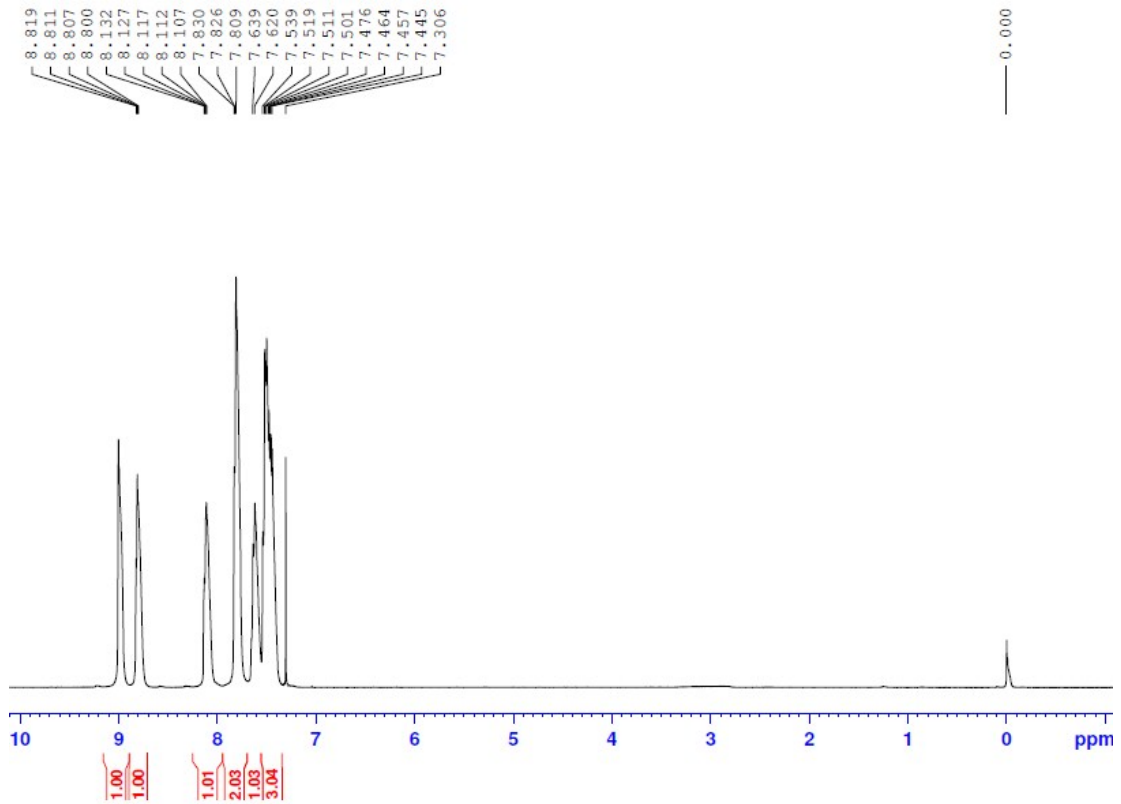

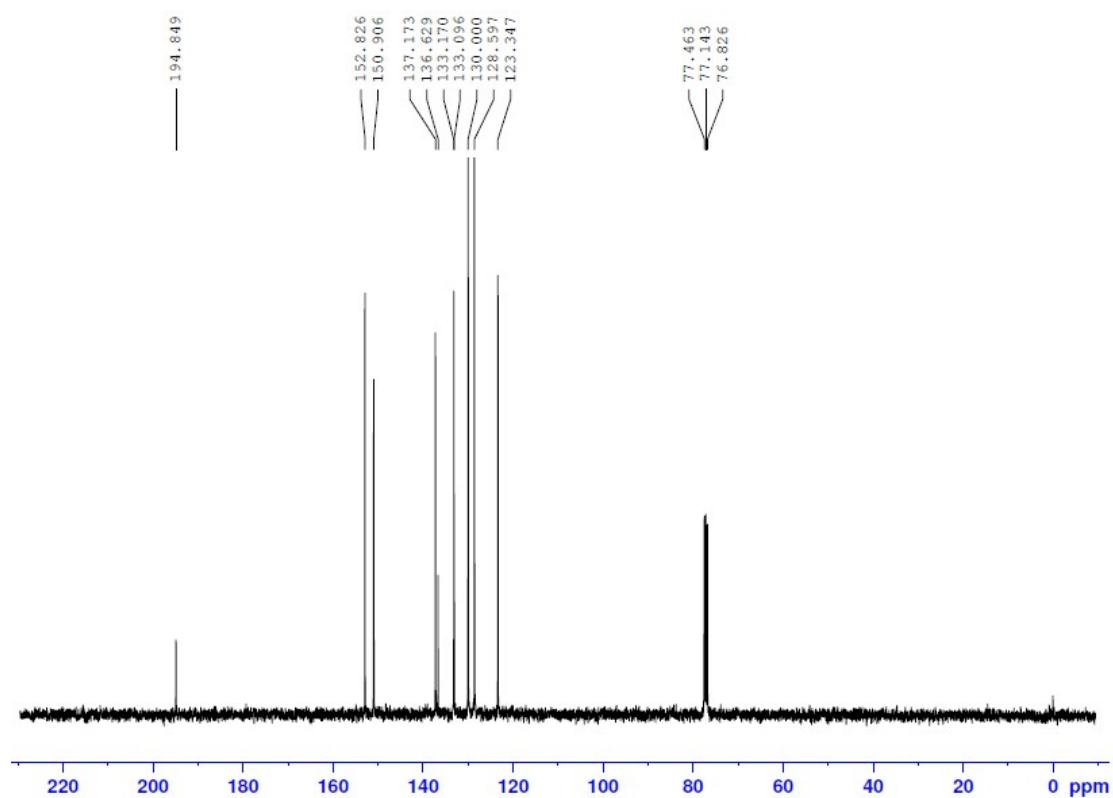

20150715\_APCH3L #12 RT: 0.16 AV: 1 NL: 3.43E9  
 T: FTMS + c APC1 corona Full ms [100.00-800.00]

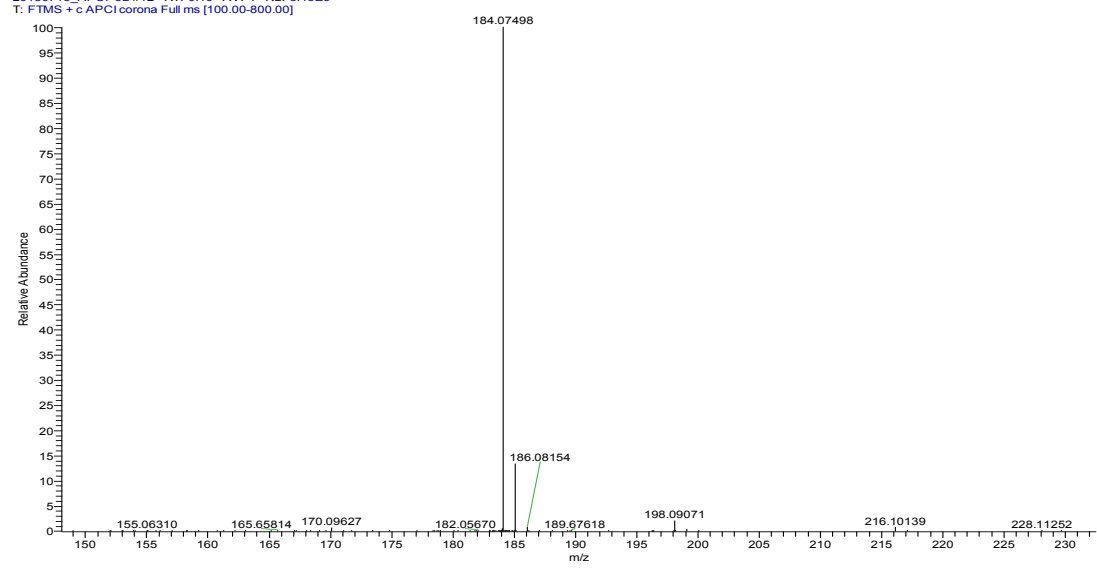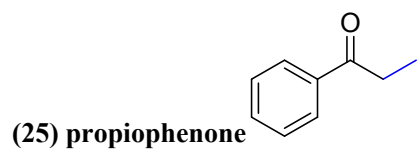

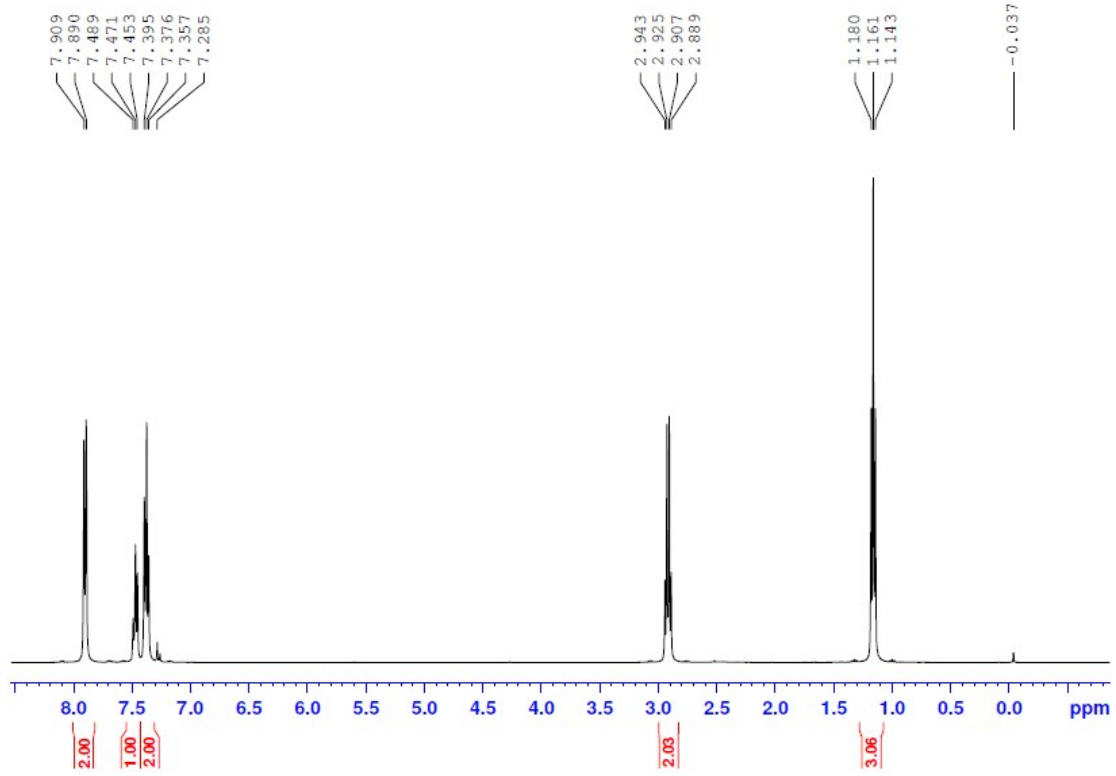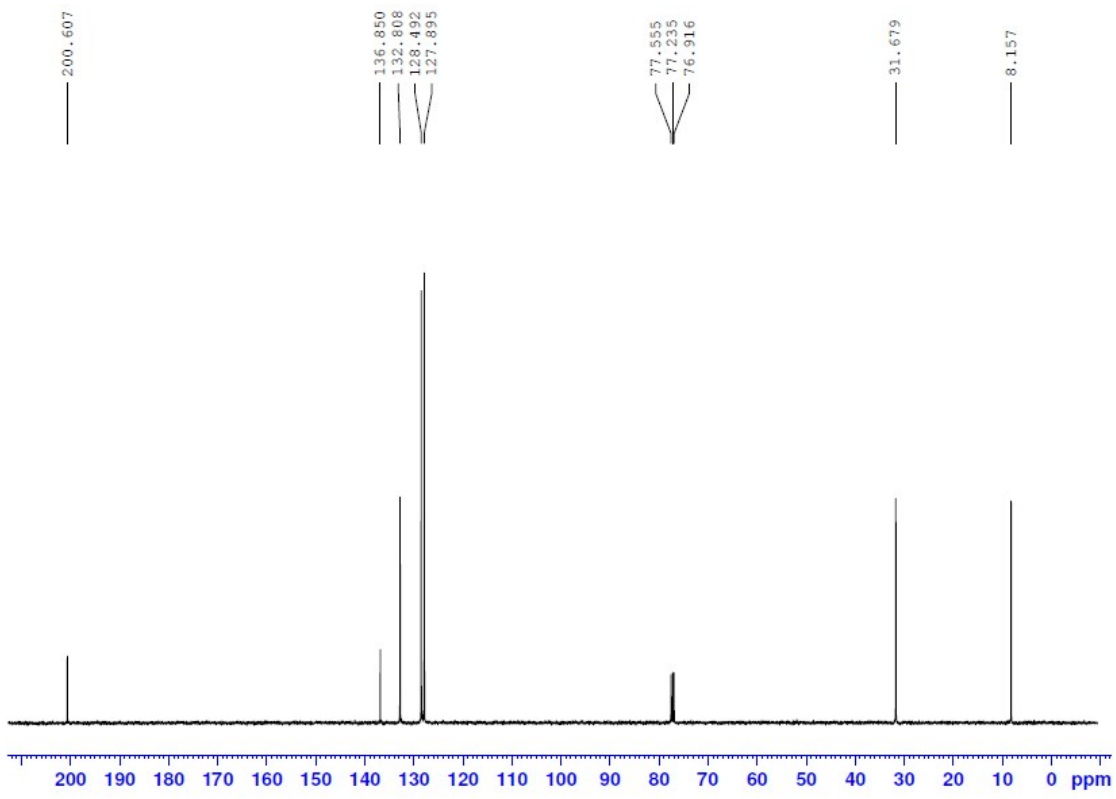



20150709\_ApCh4O #7 RT: 0.09 AV: 1 NL: 1.25E8  
T: FTMS + c APCI corona Full ms [100.00-800.00]

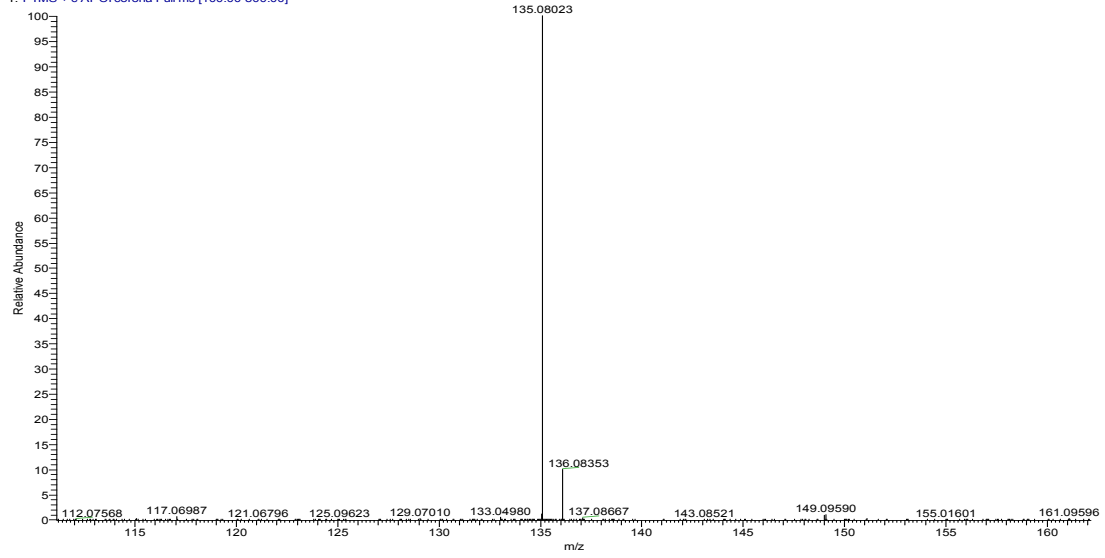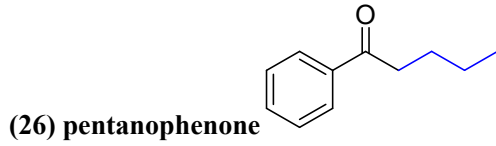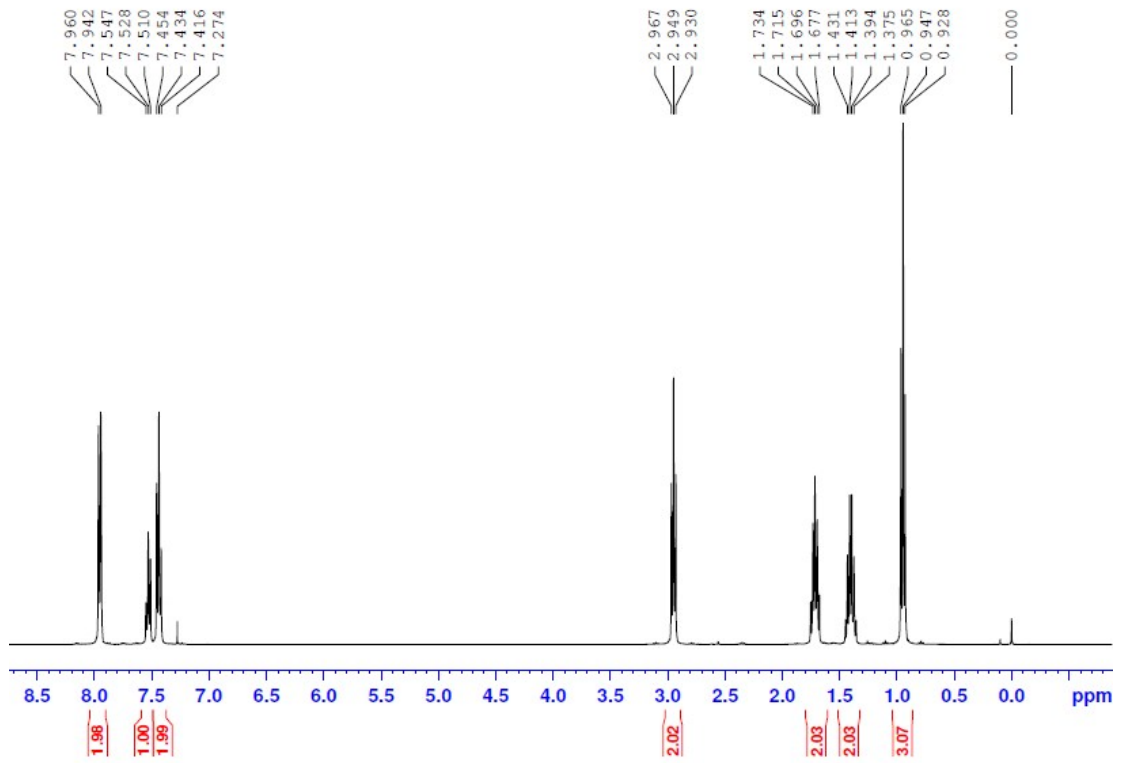

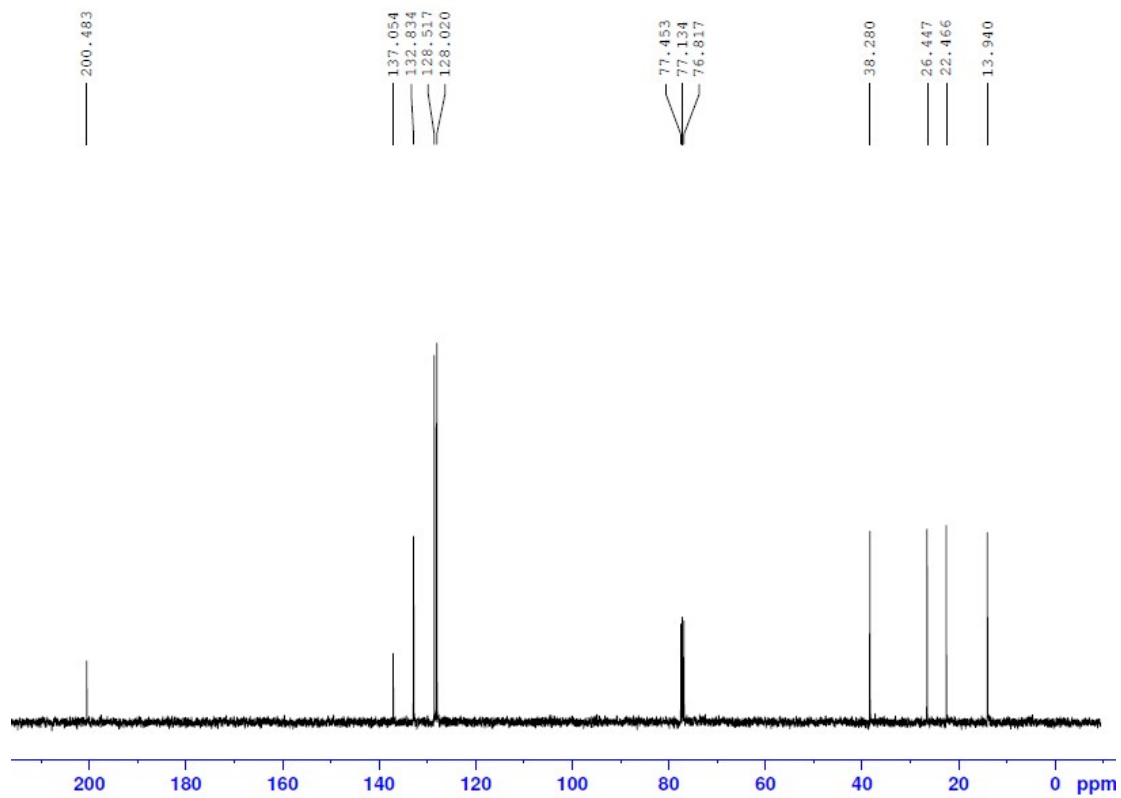

20150708\_APCI4P #24 RT: 0.32 AV: 1 NL: 1.90E7  
T: FTMS + c ESI Full ms [100.00-800.00]

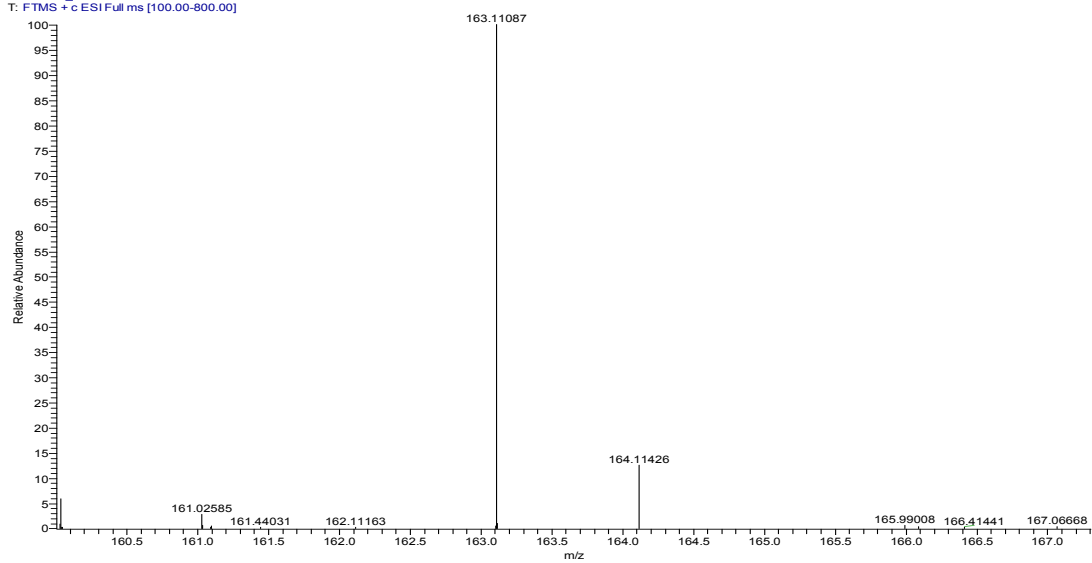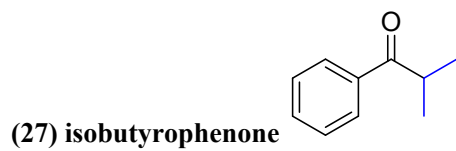

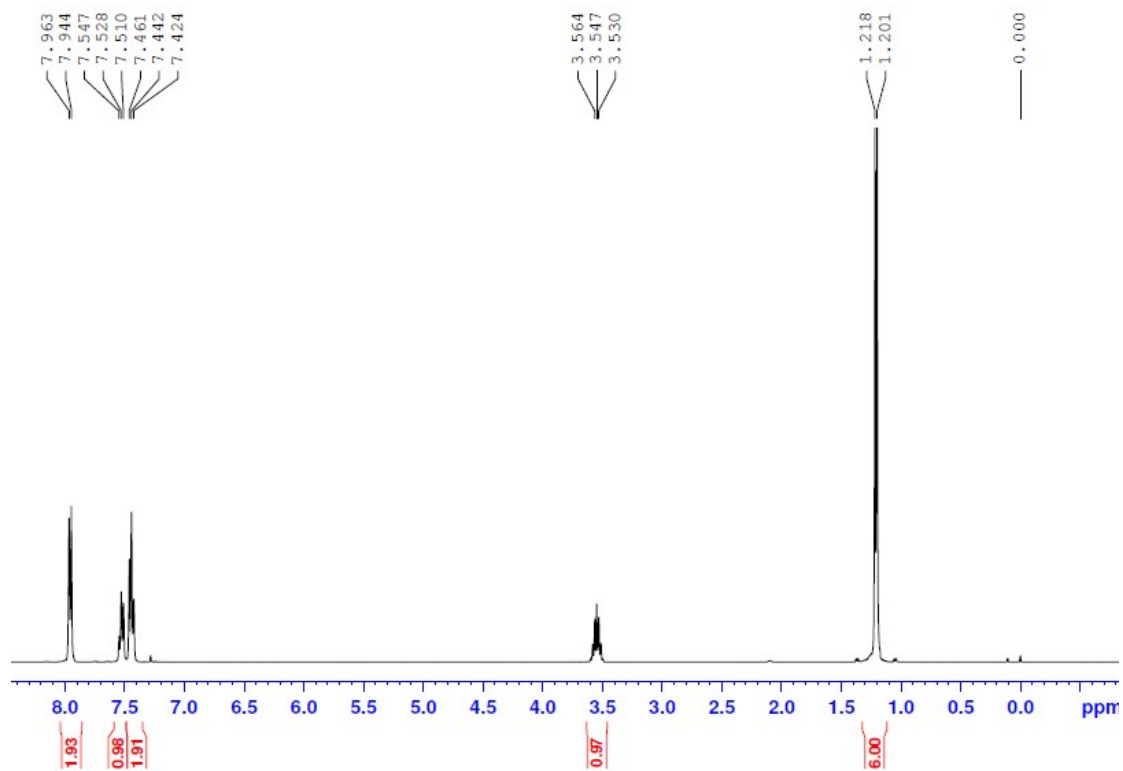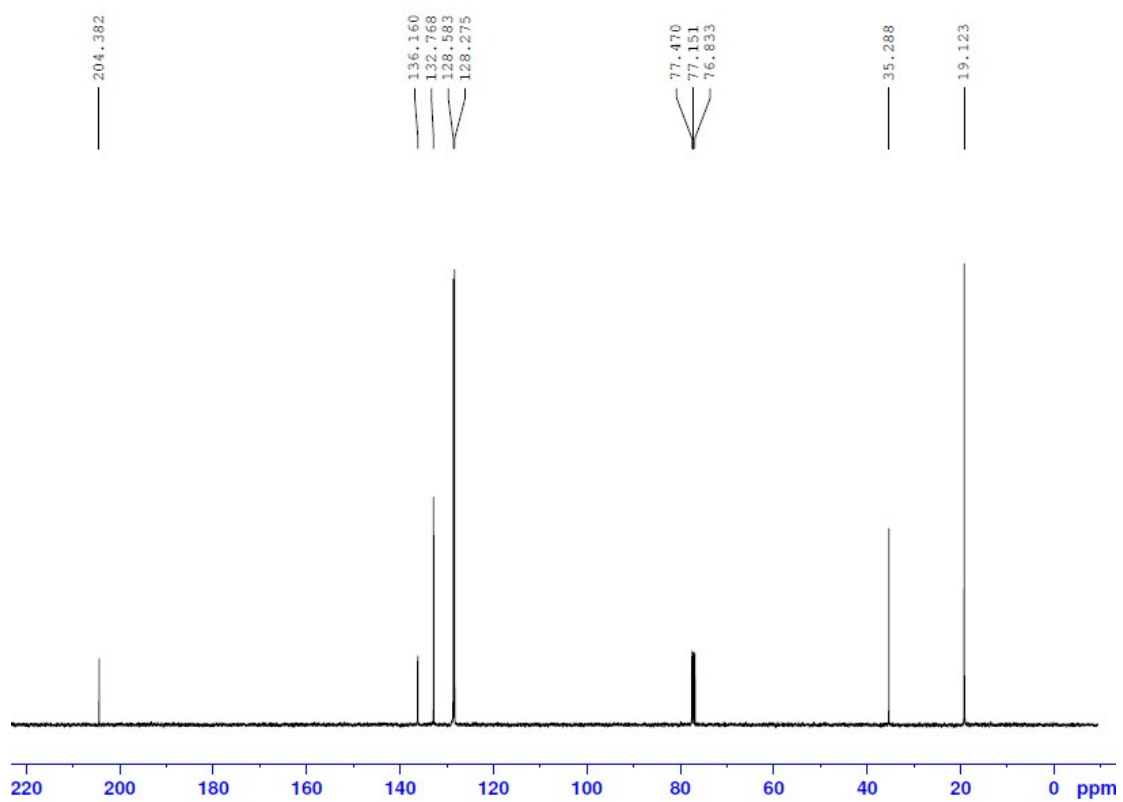

20150708\_ApCH4Q#14 RT: 0.18 AV: 1 NL: 1.73E7  
T: FTMS + c ESI Full ms [100.00-800.00]

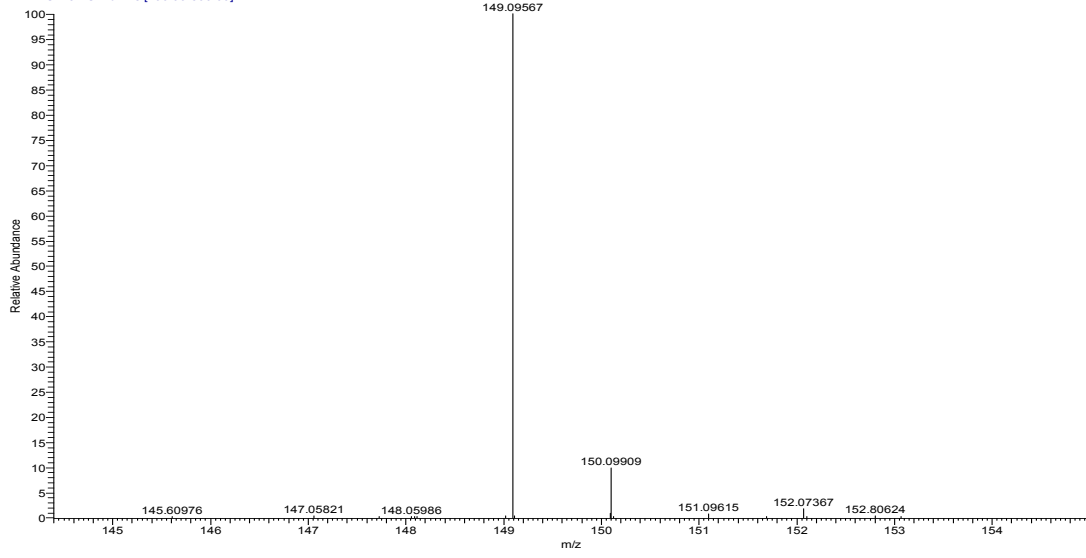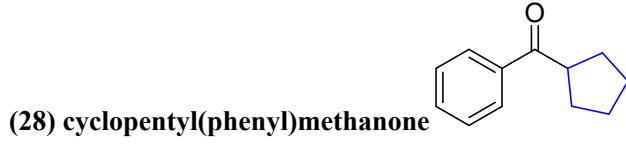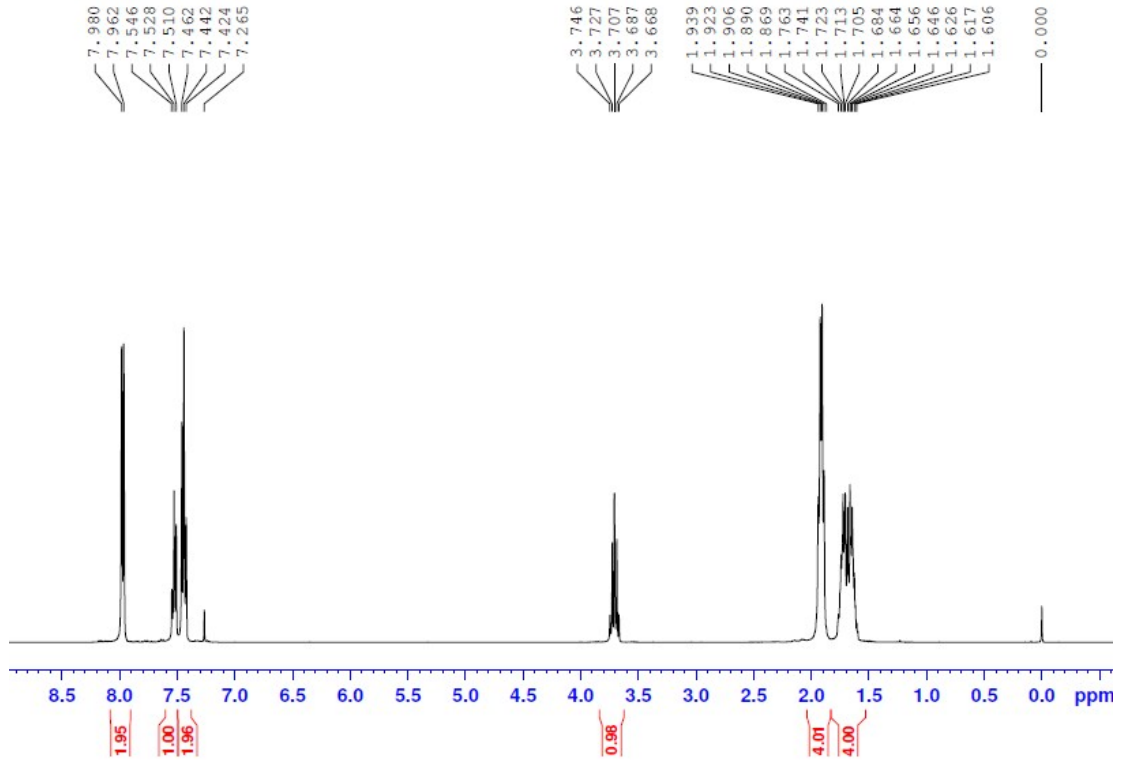

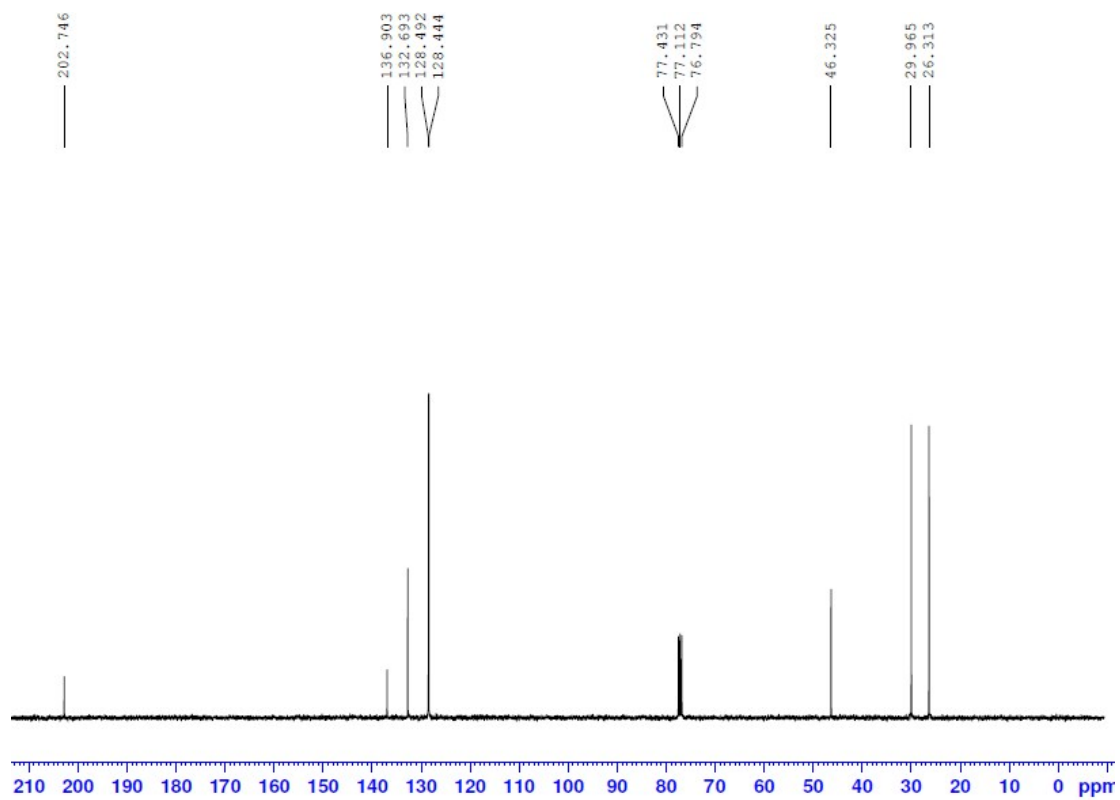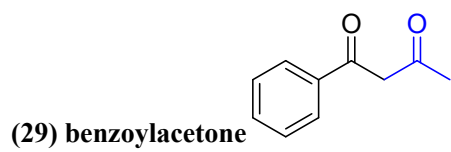

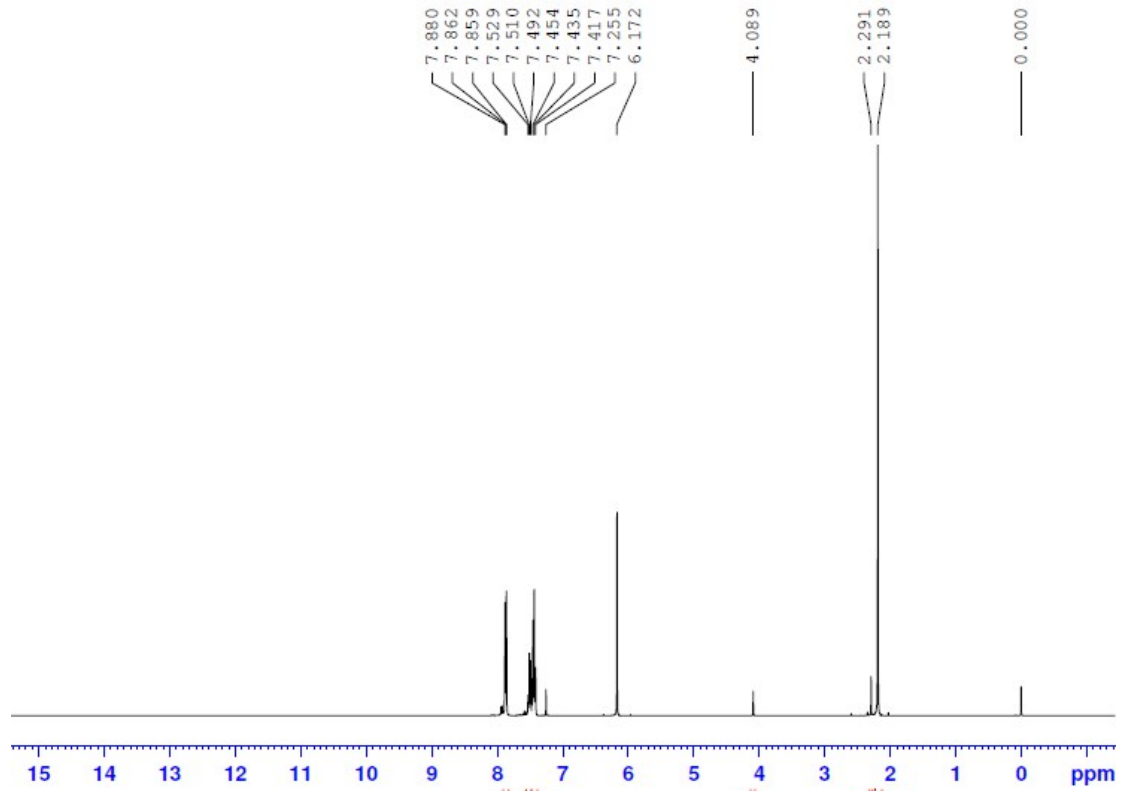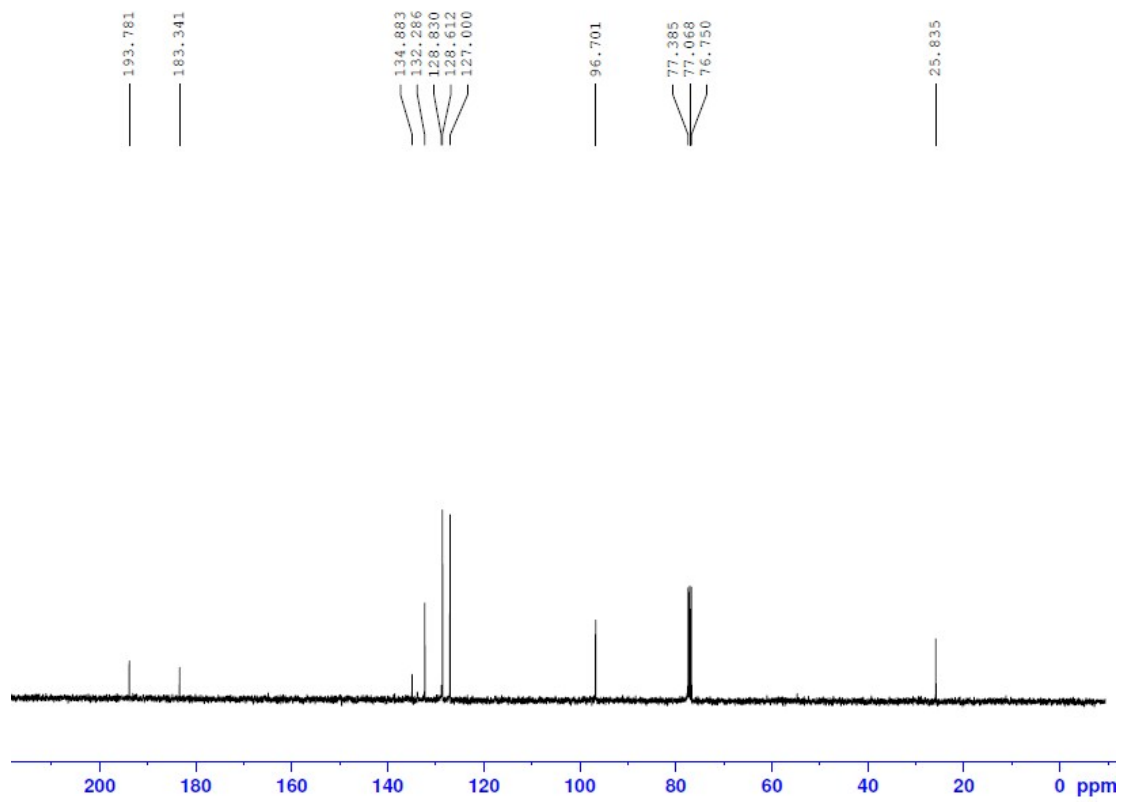

20150708\_APC44P #24 RT: 0.32 AV: 1 NL: 1.90E7  
T: FTMS + c ESI Full ms [100.00-800.00]

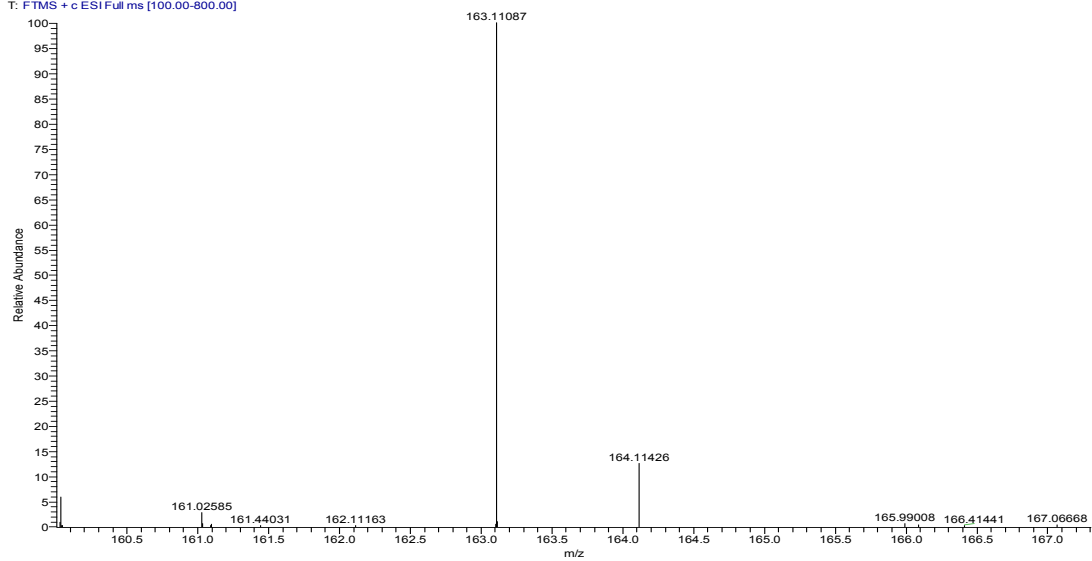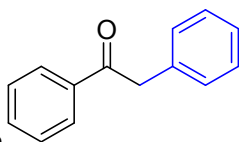

(30) 1,2-diphenylethanone

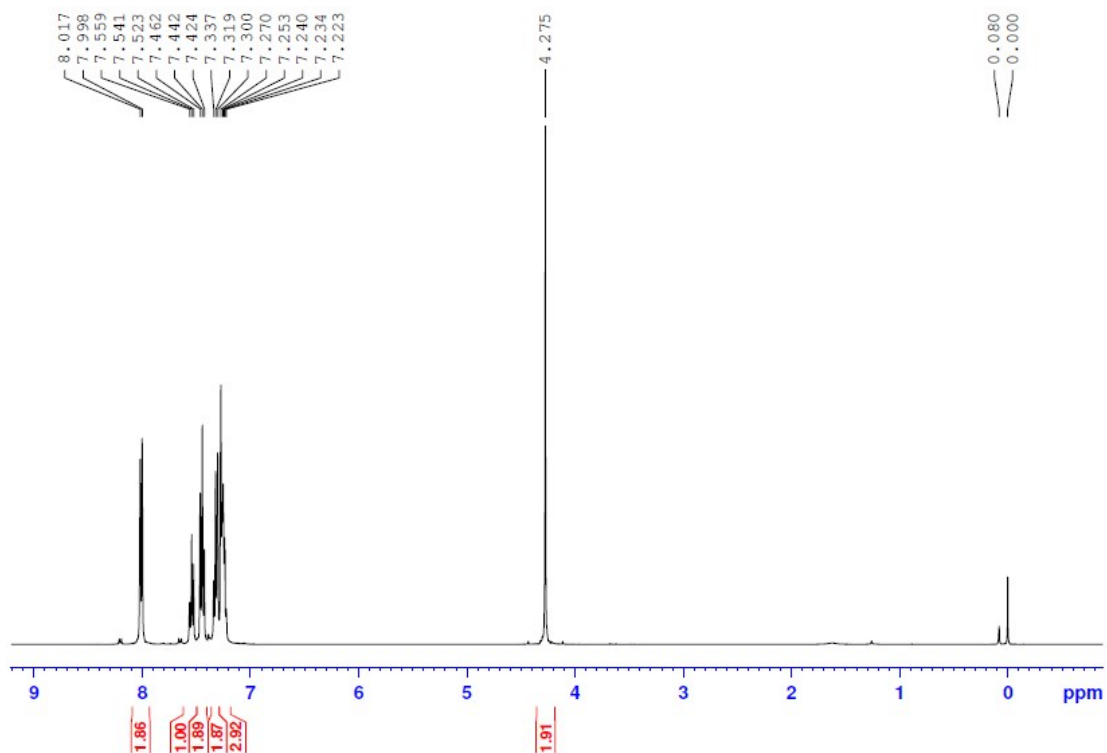

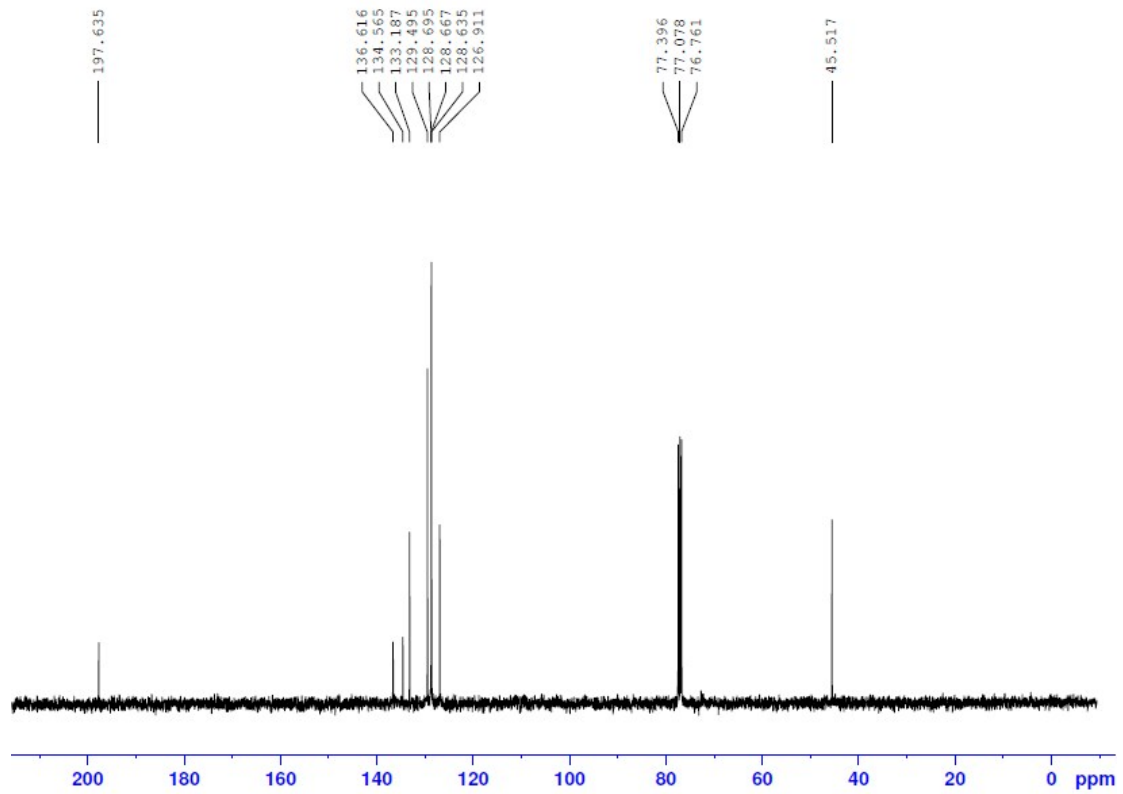

20150709\_APCH-3J #8 RT: 0.10 AV: 1 NL: 1.07E9  
 T: FTMS + c APCI corona Full ms [100.00-800.00]

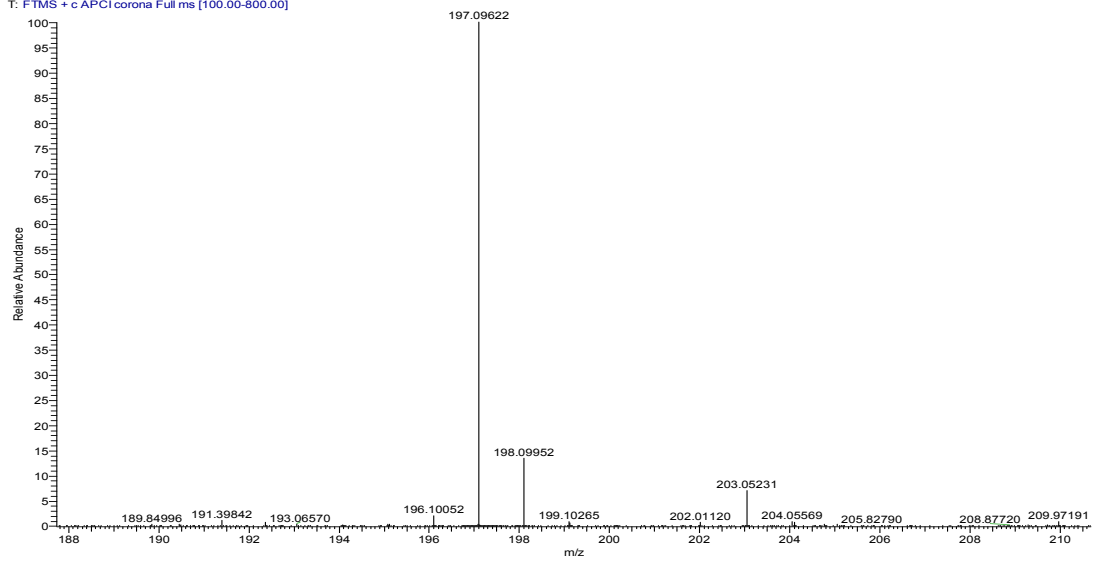

Supplement: c6qo00634e1.pdf [file c6qo00634e1.pdf]
